# Supplementary material
Source: PubMed Central journal article supplement (PMC2692646)

Total Synthesis of the  $\alpha$ -Glucosidase Inhibitors  
Schulzeine A, B and C and a Structural Revision of  
Schulzeine A

*Edward G. Bowen and Duncan J. Wardrop\**

Department of Chemistry, University of Illinois at Chicago,  
845 West Taylor Street, Chicago, IL 60607-7061.

***Supporting Information, Part 2***

\*Corresponding author:  
Tel: 312-355-1035  
Fax: 312-996-0431  
E-mail: wardropd@uic.edu

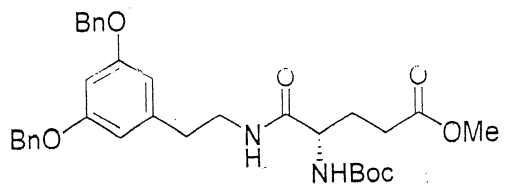

24

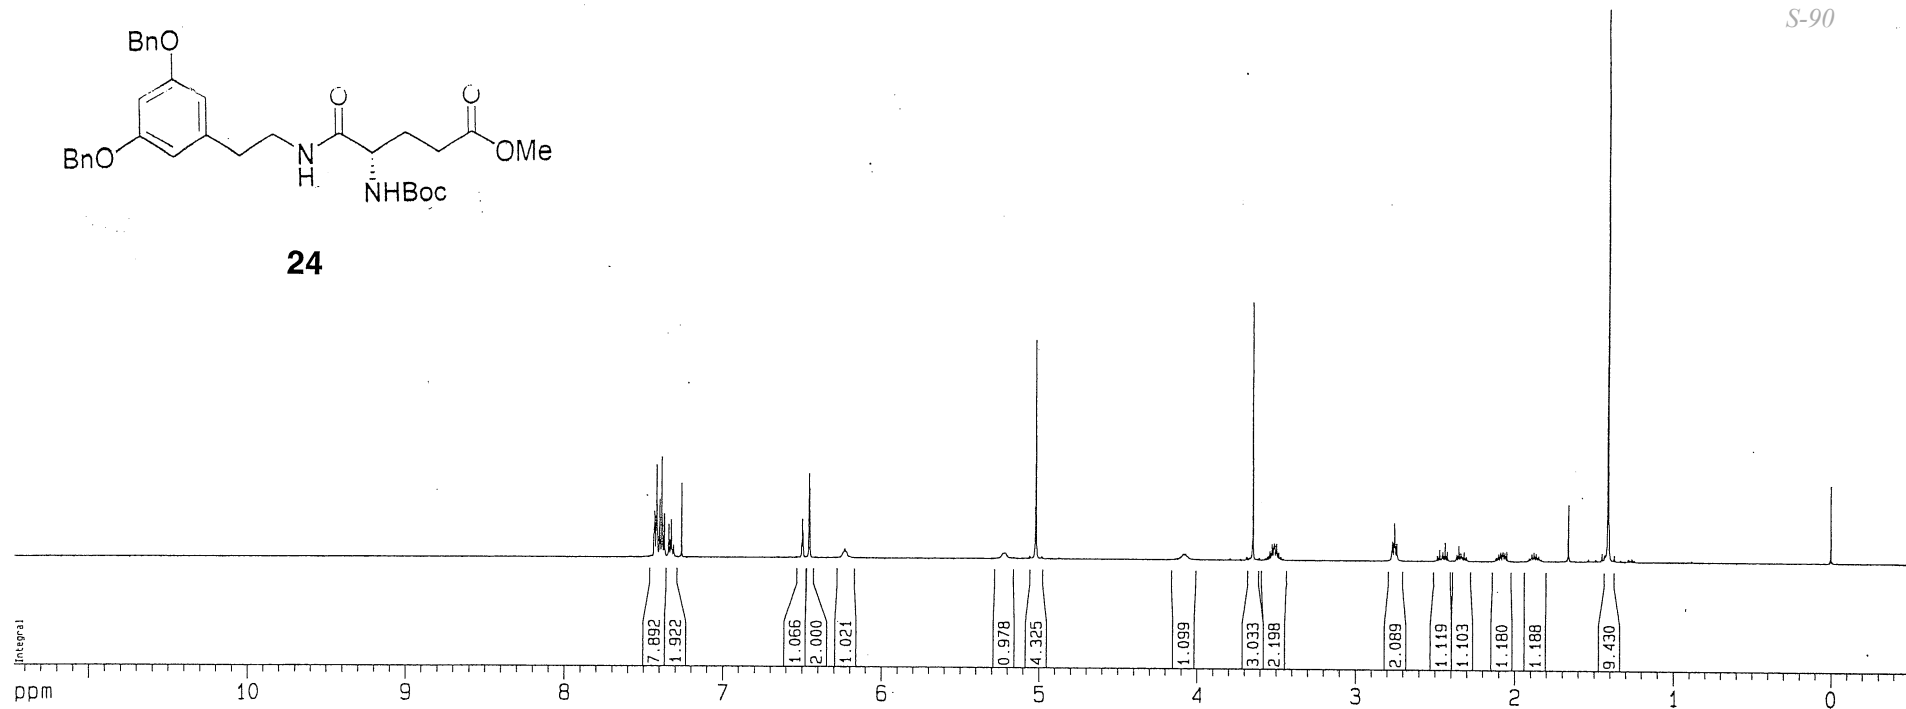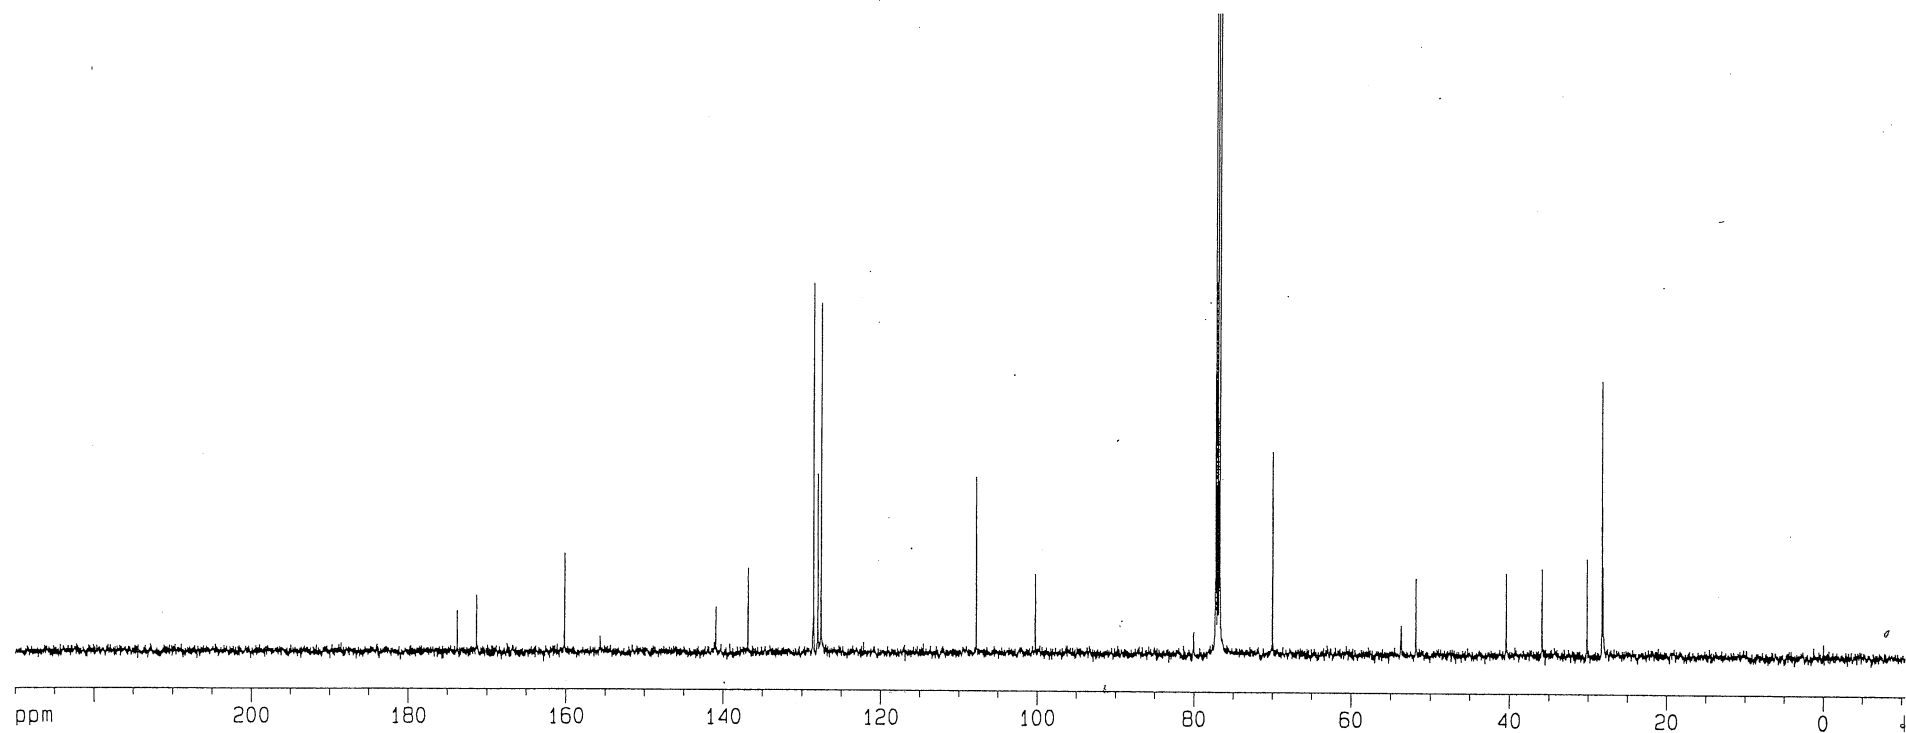

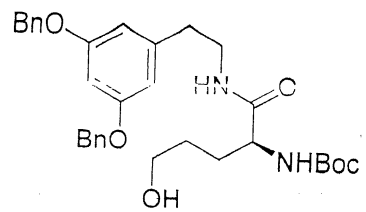**6**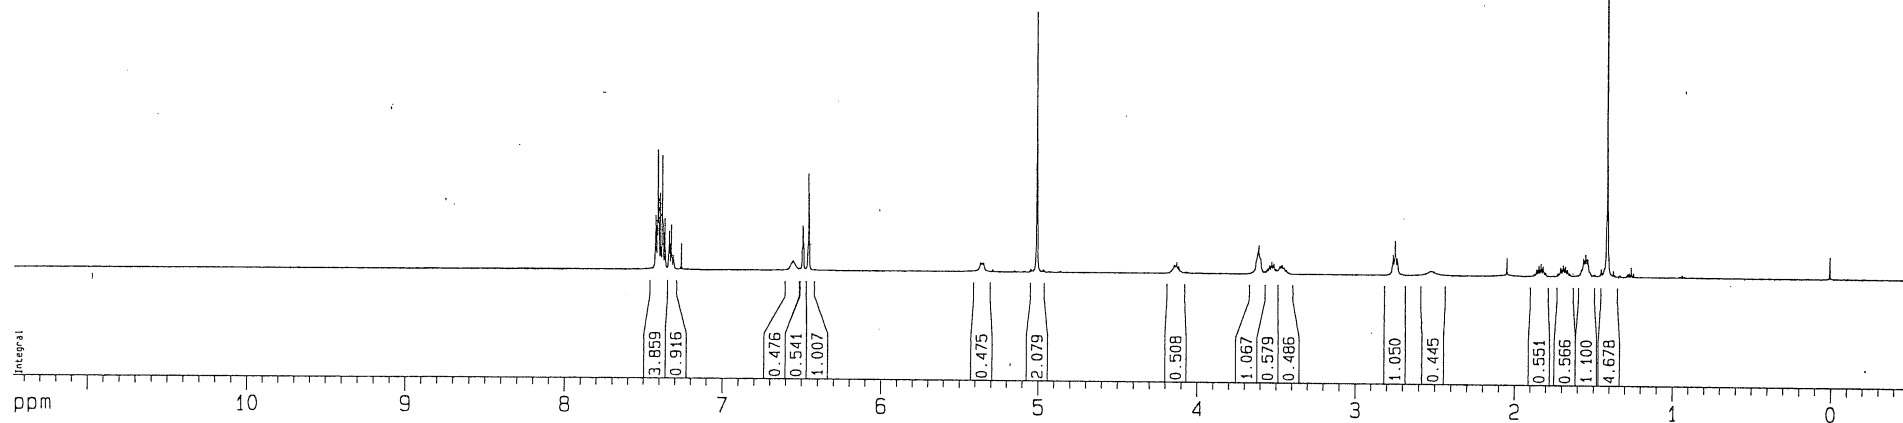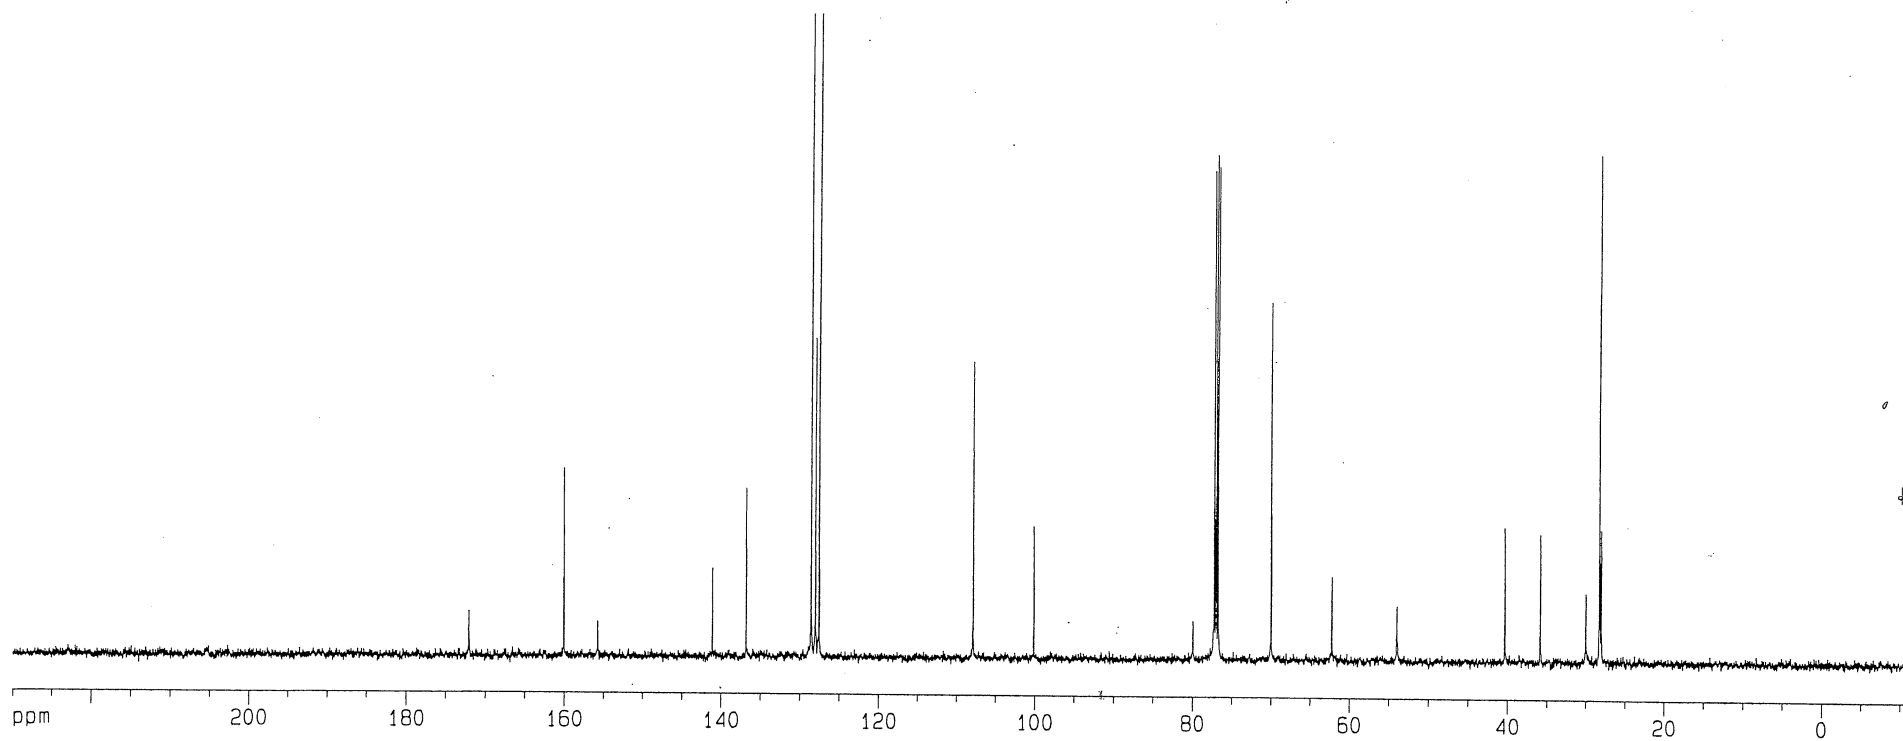

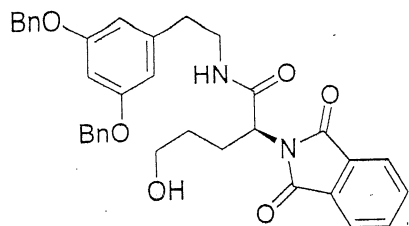**7**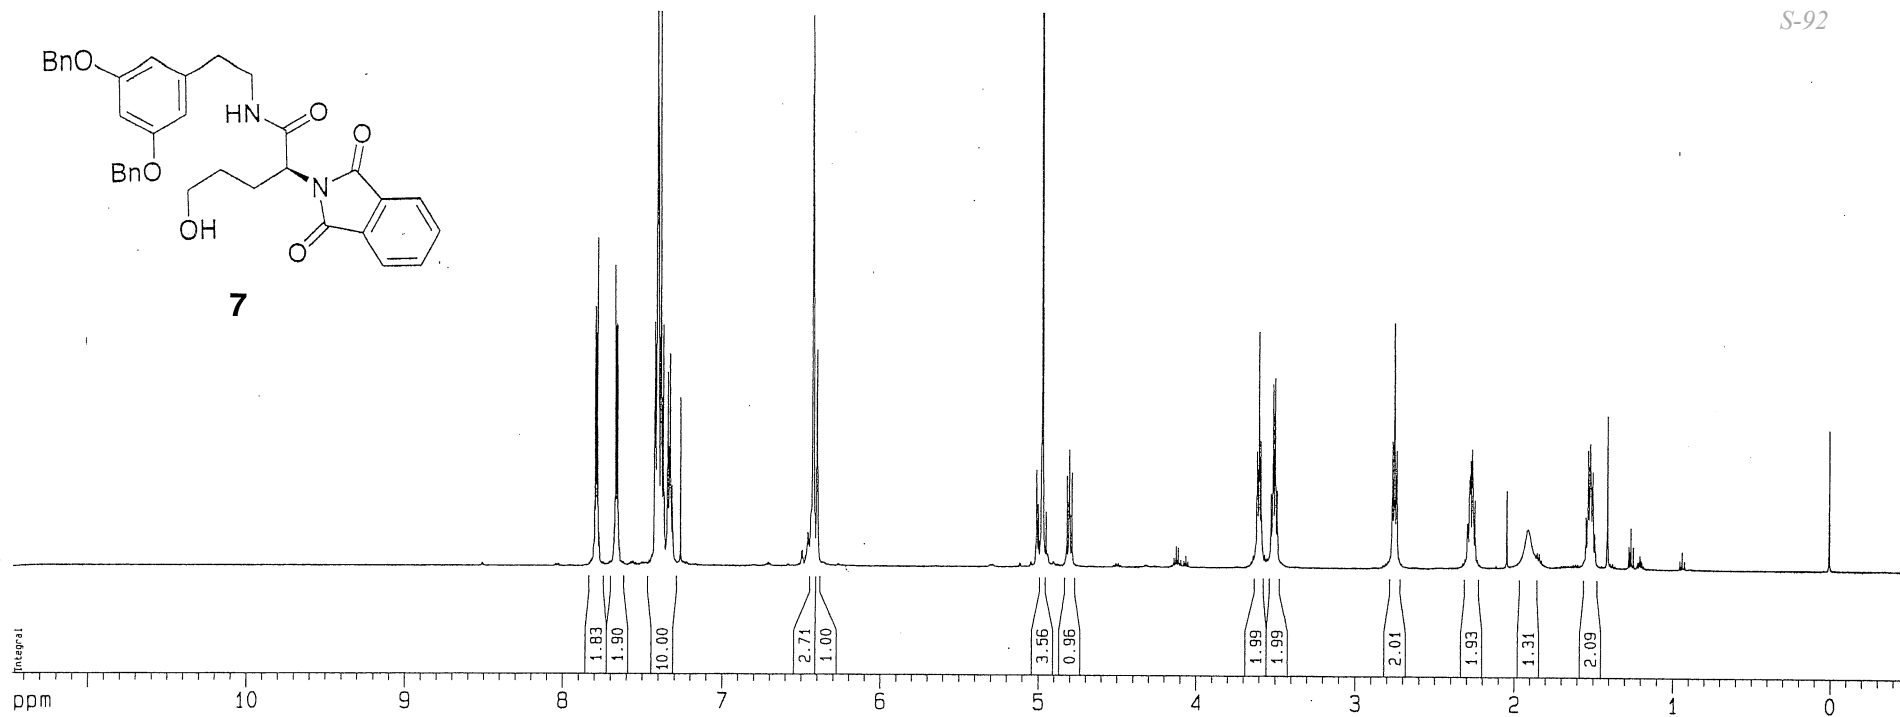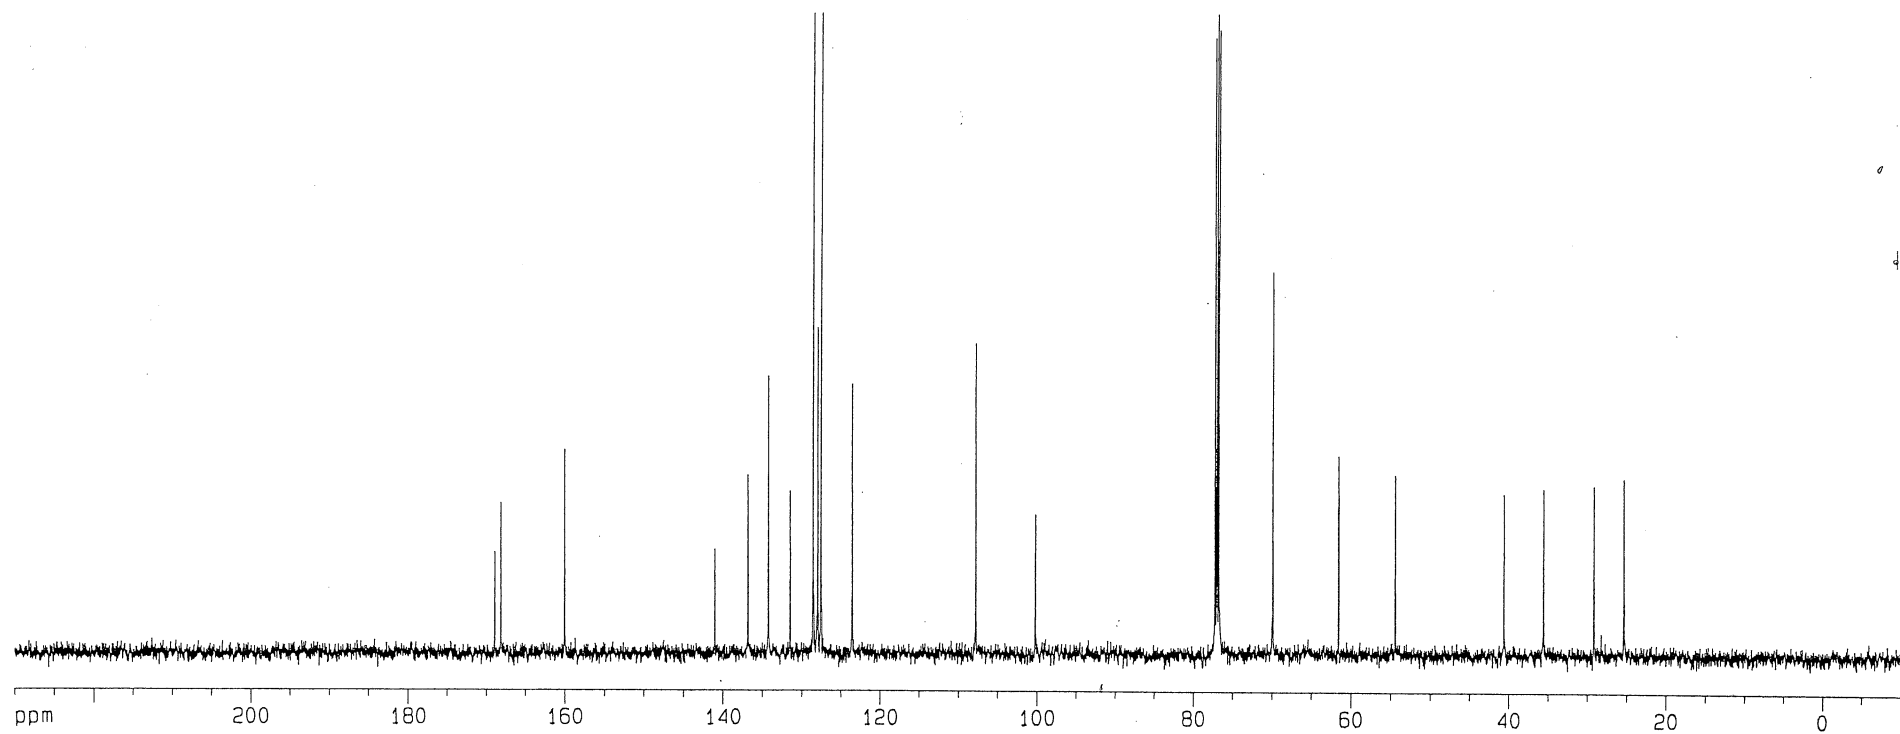

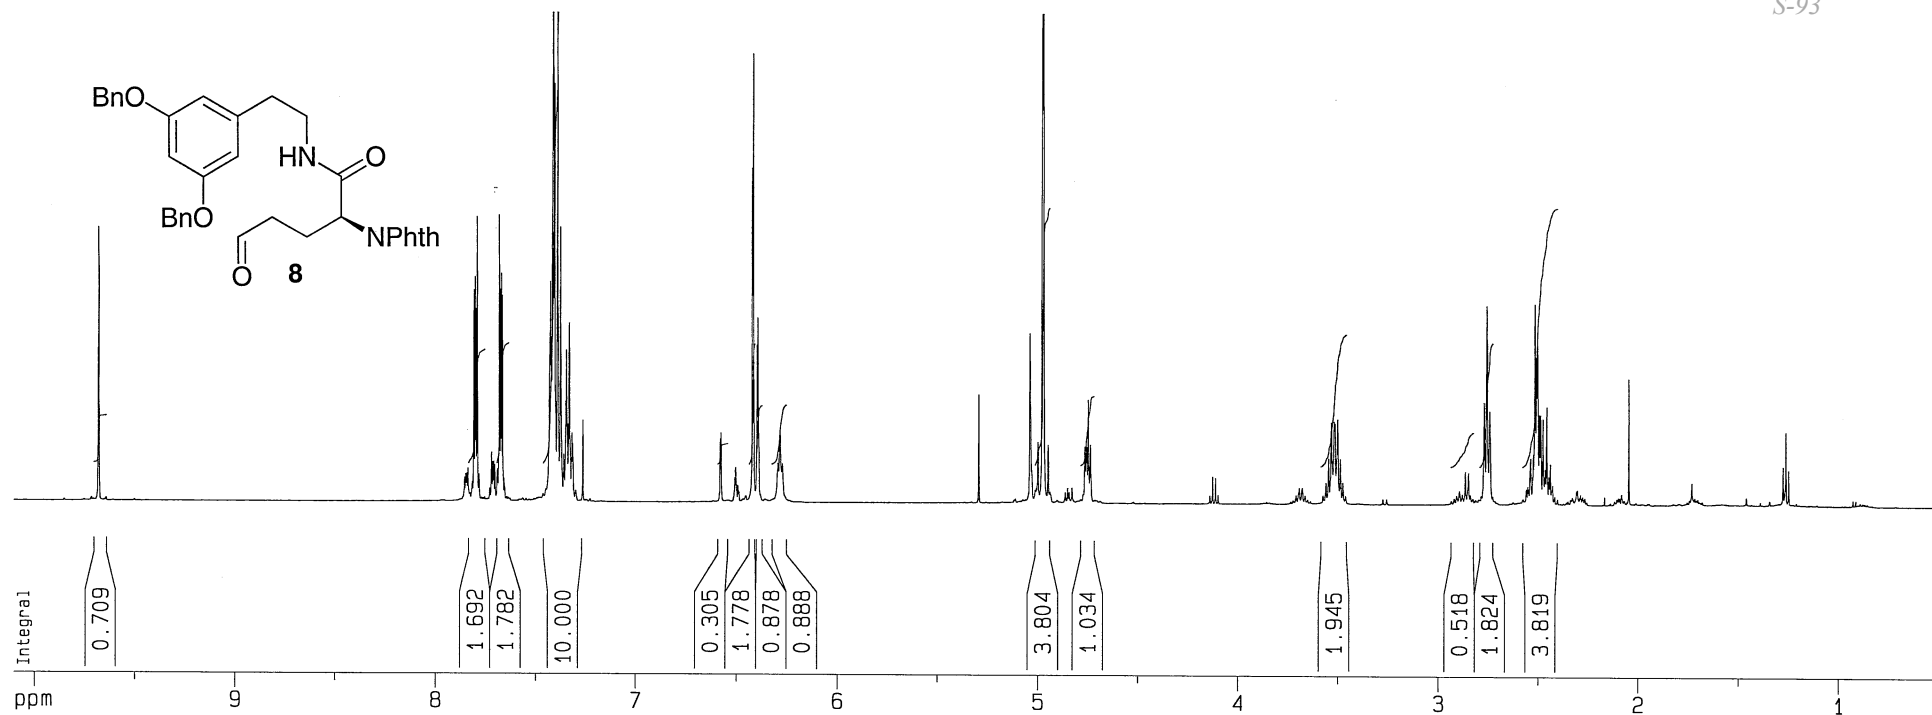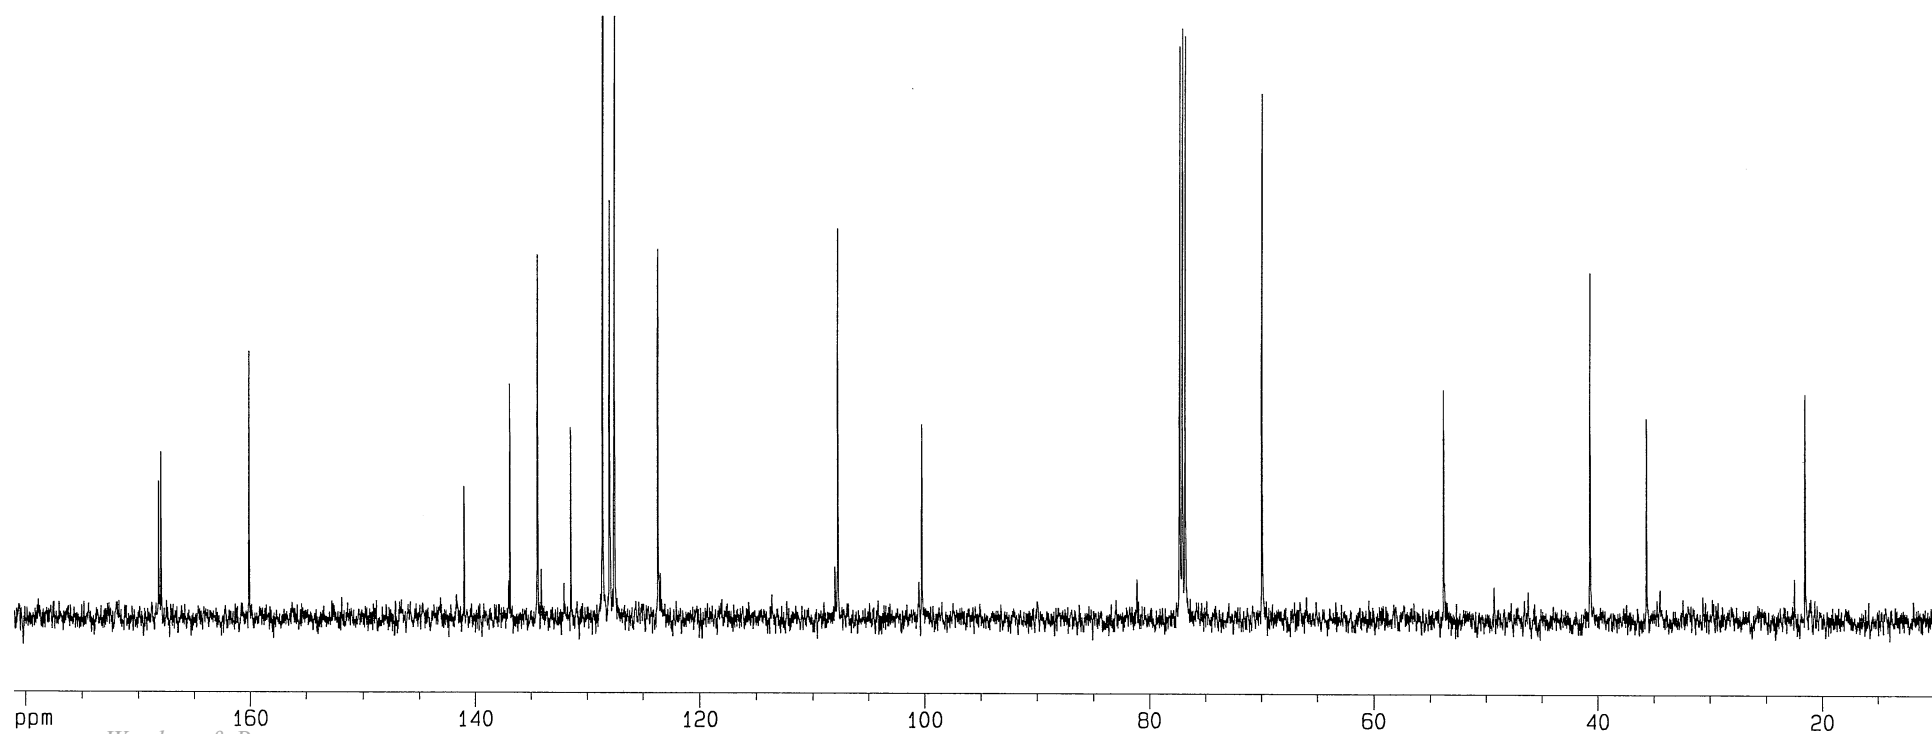

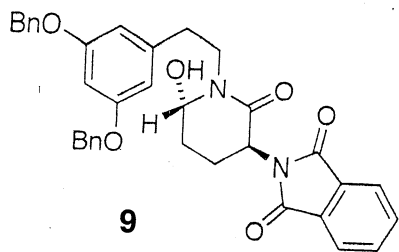

9

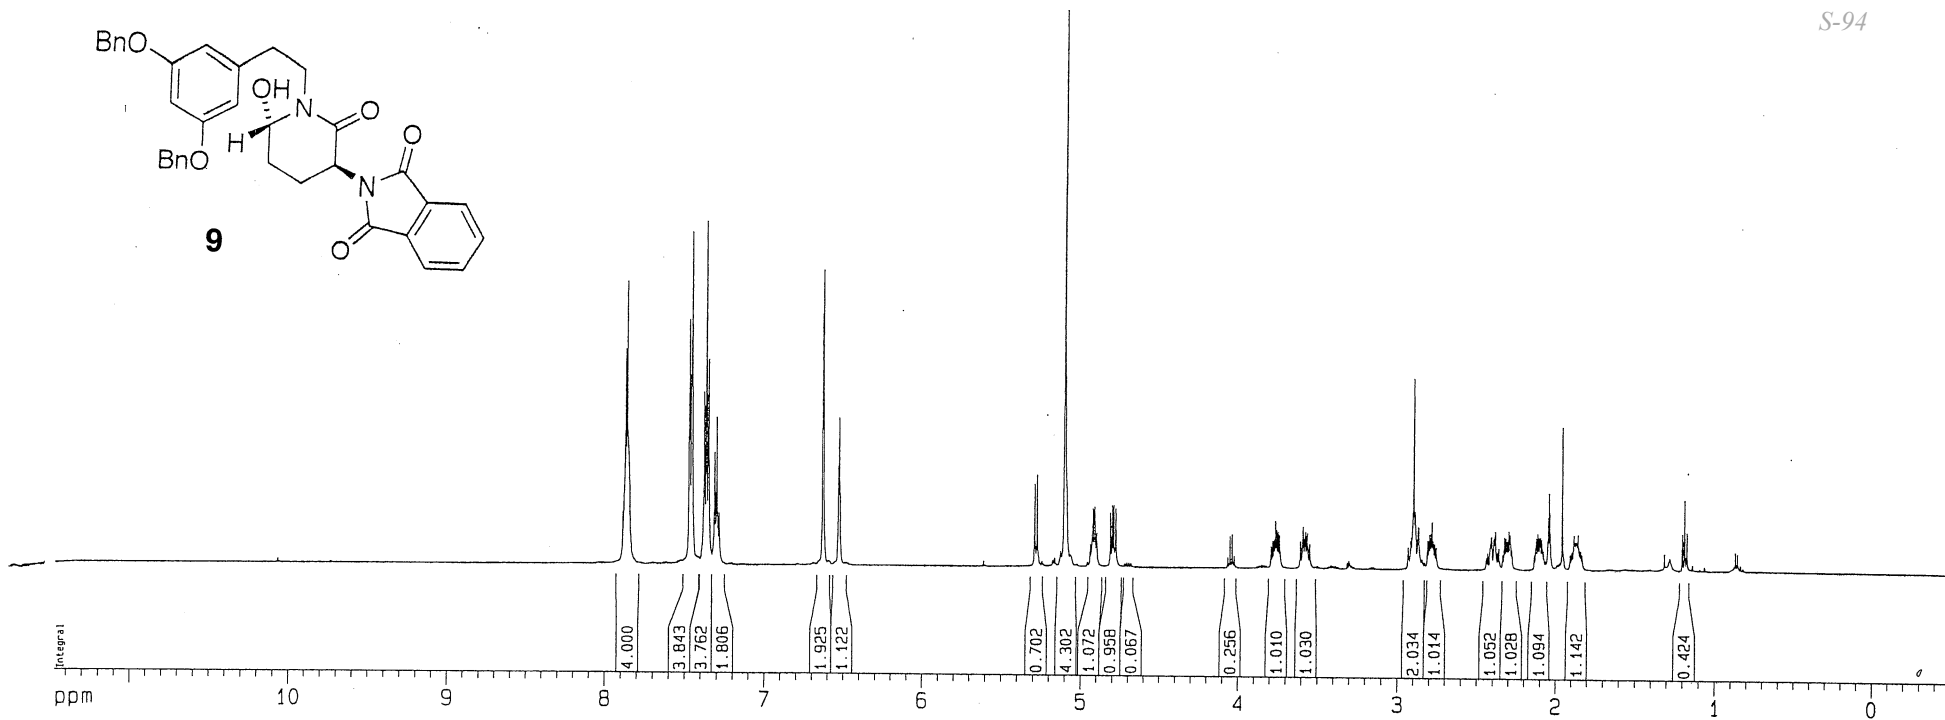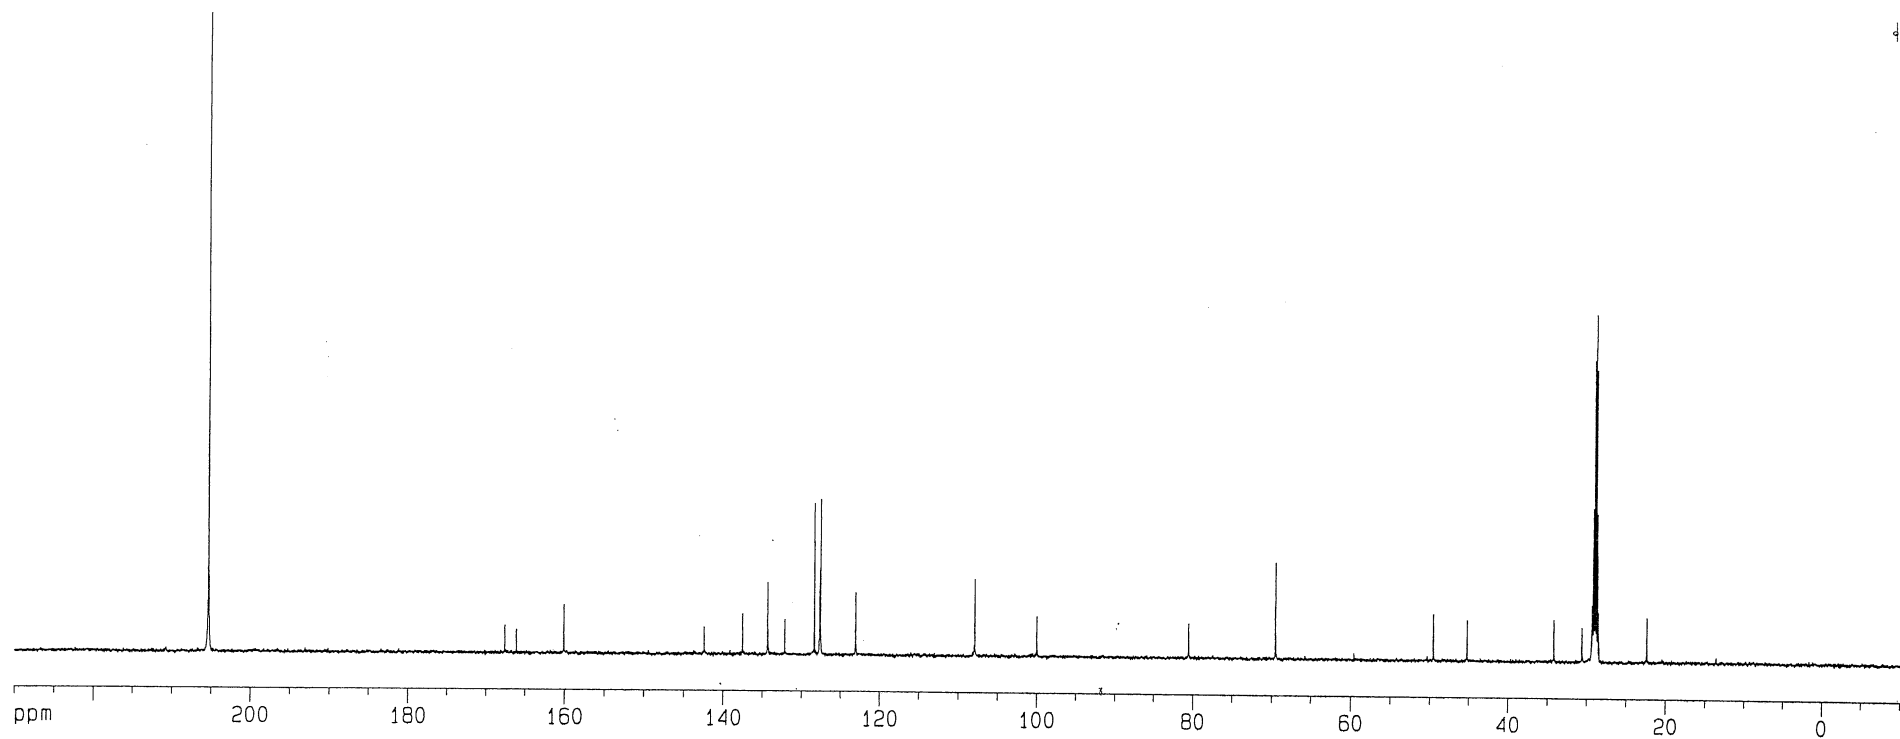

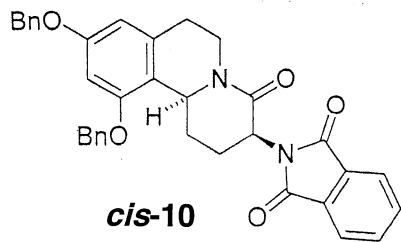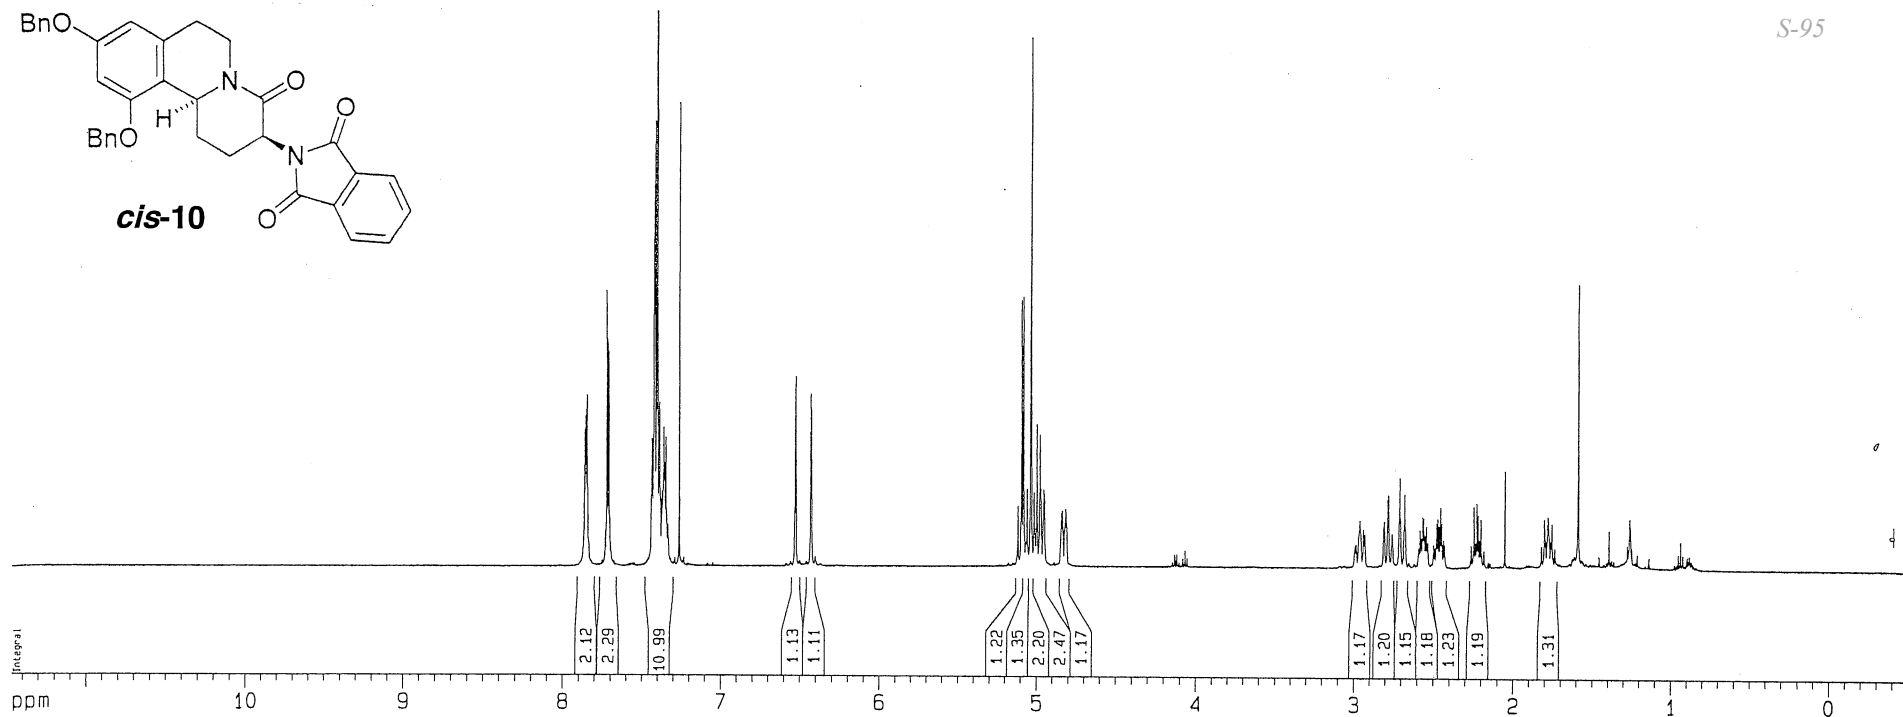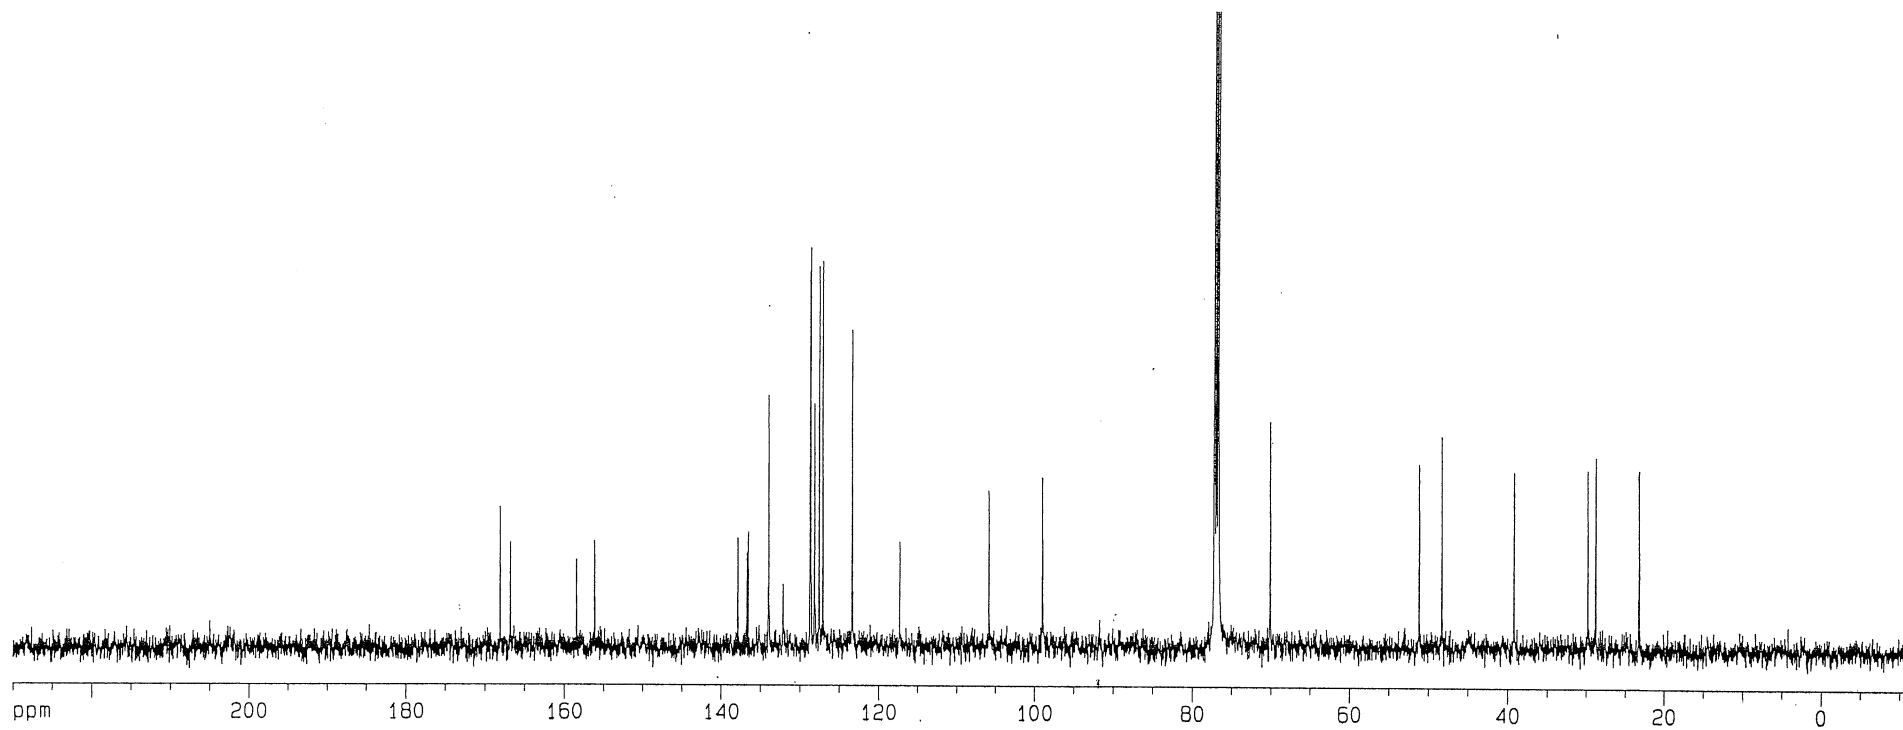

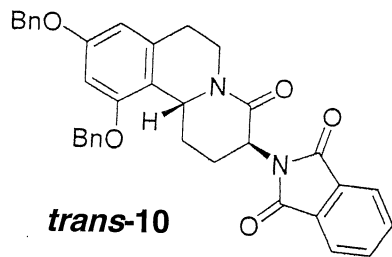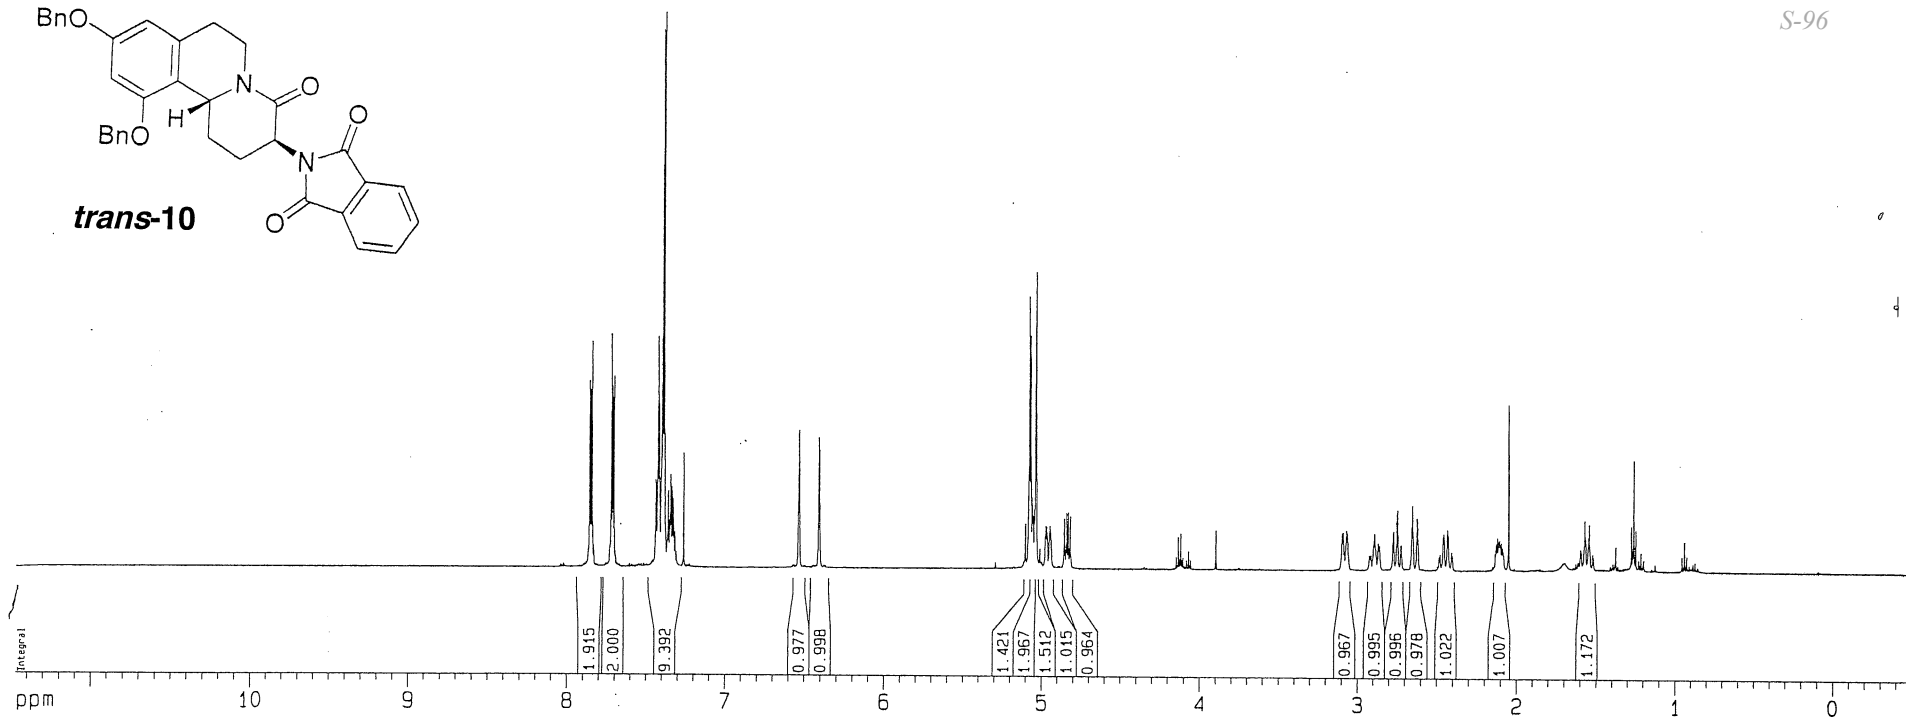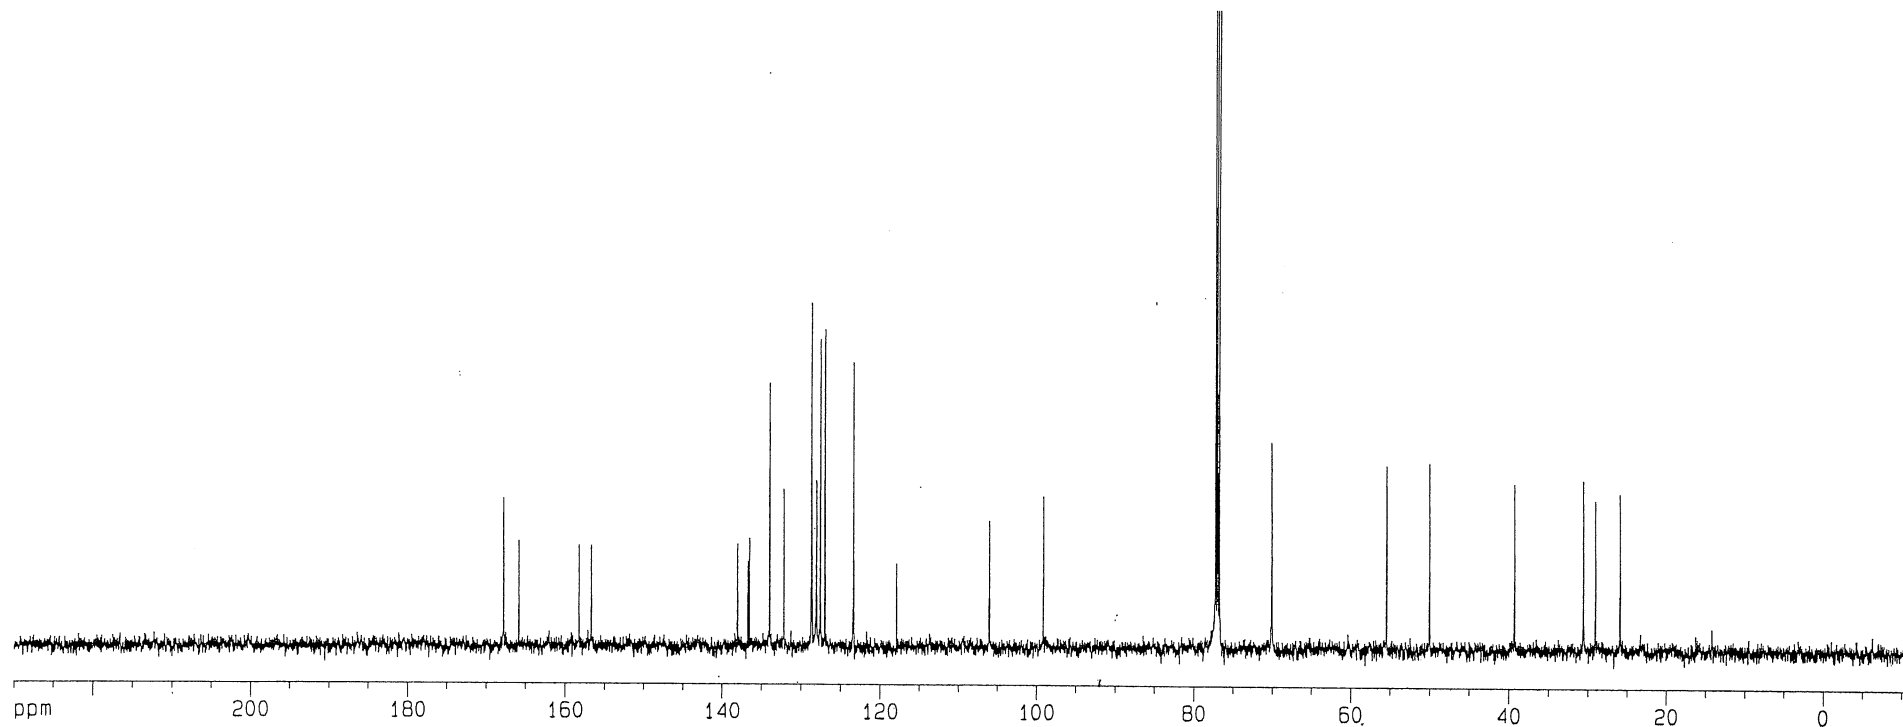



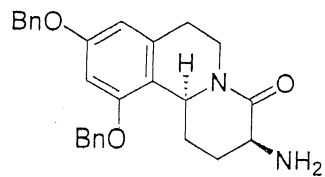***cis*-12**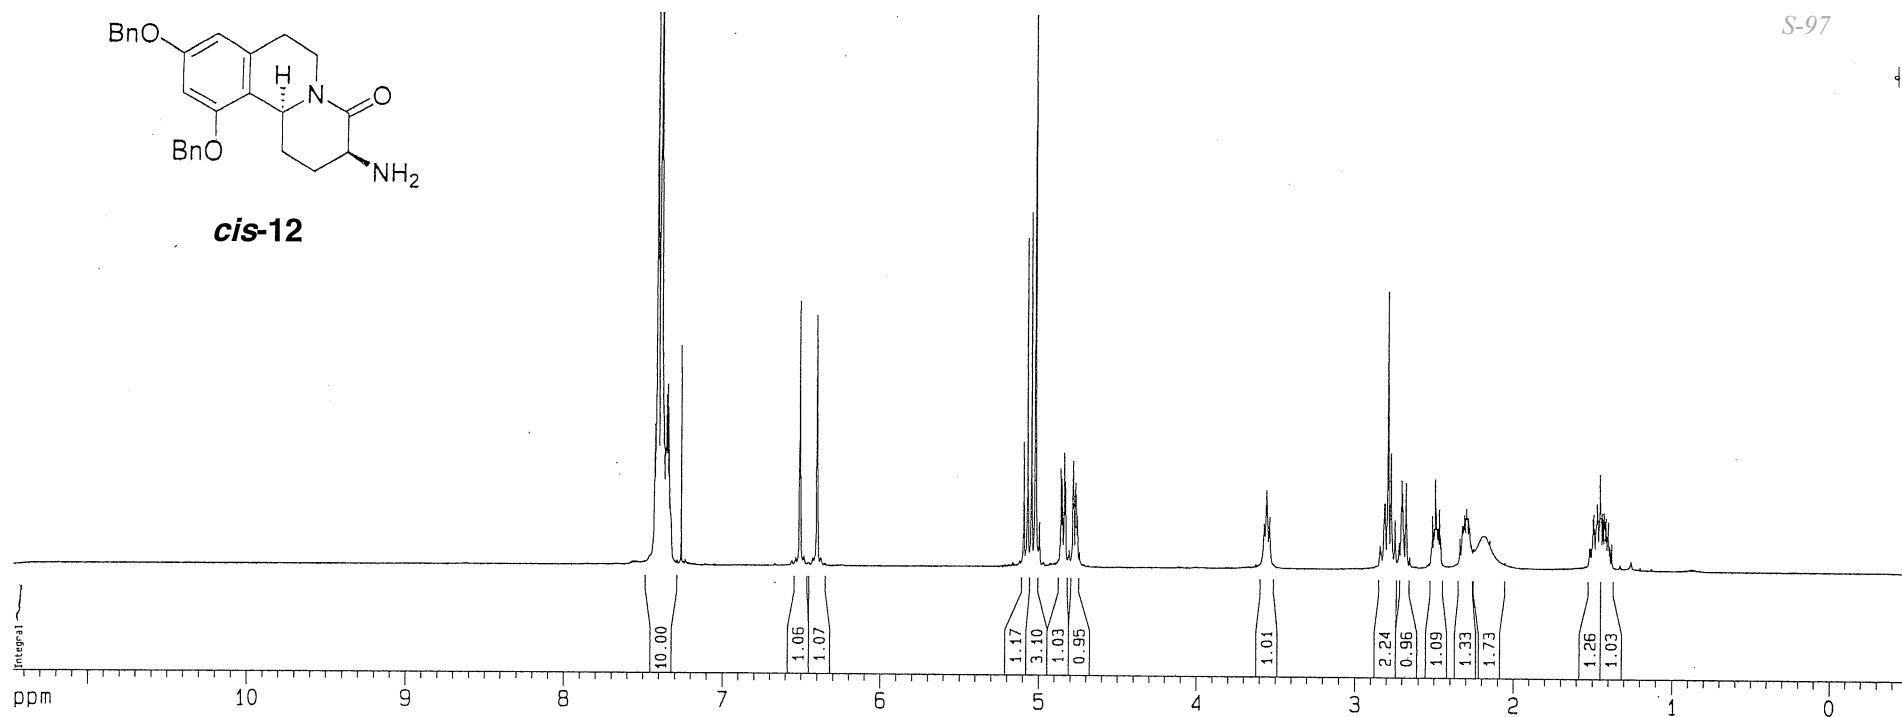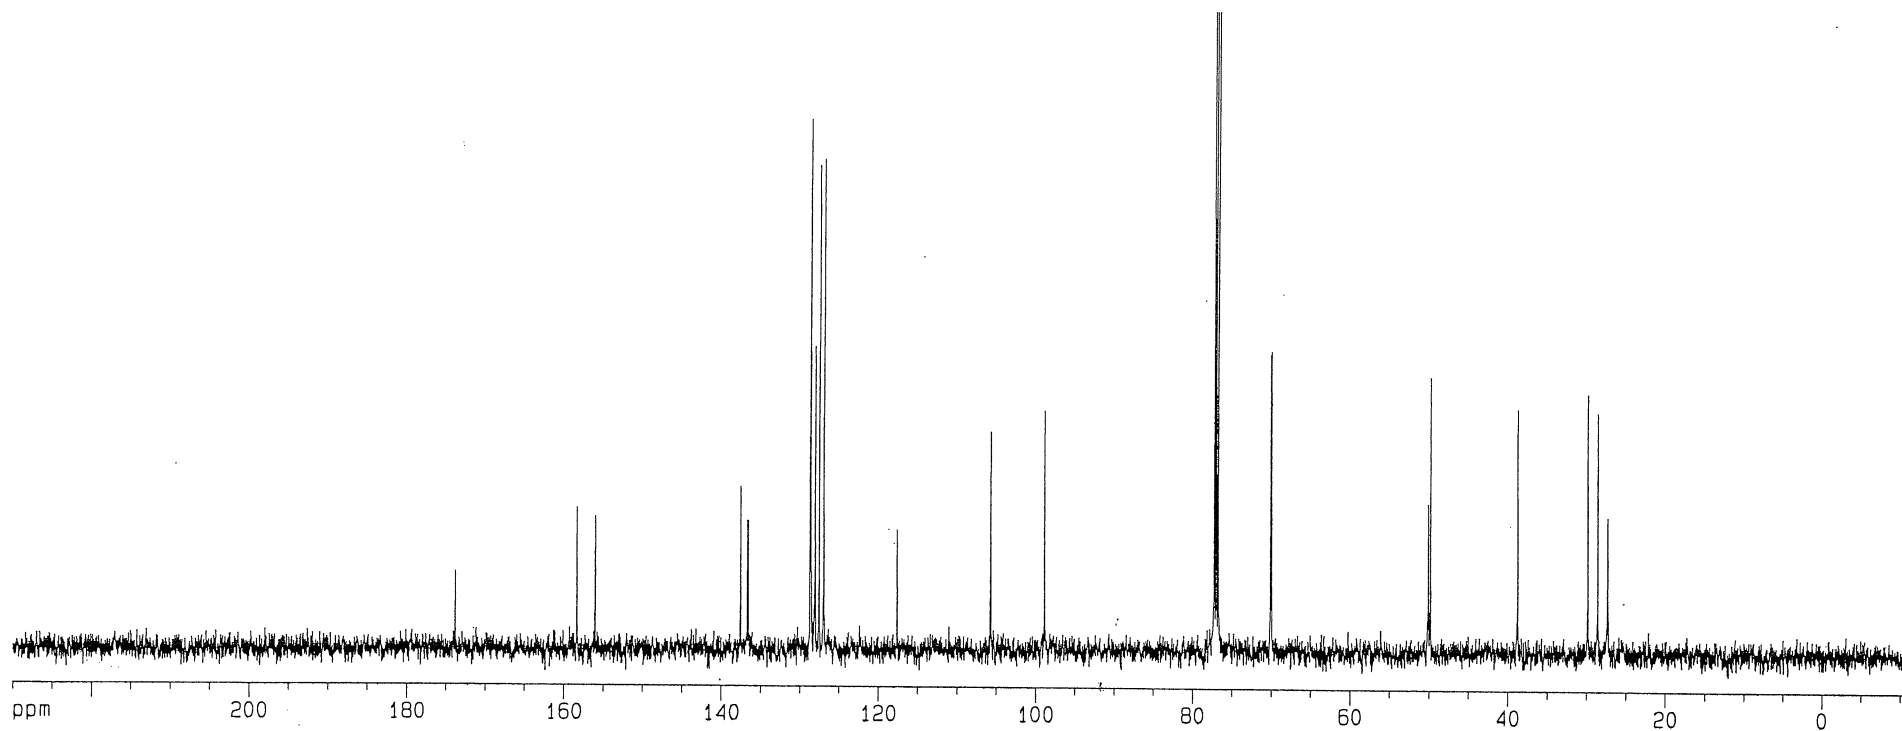

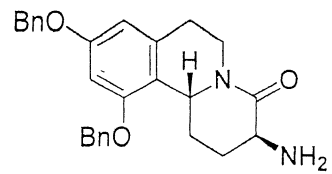***trans*-12**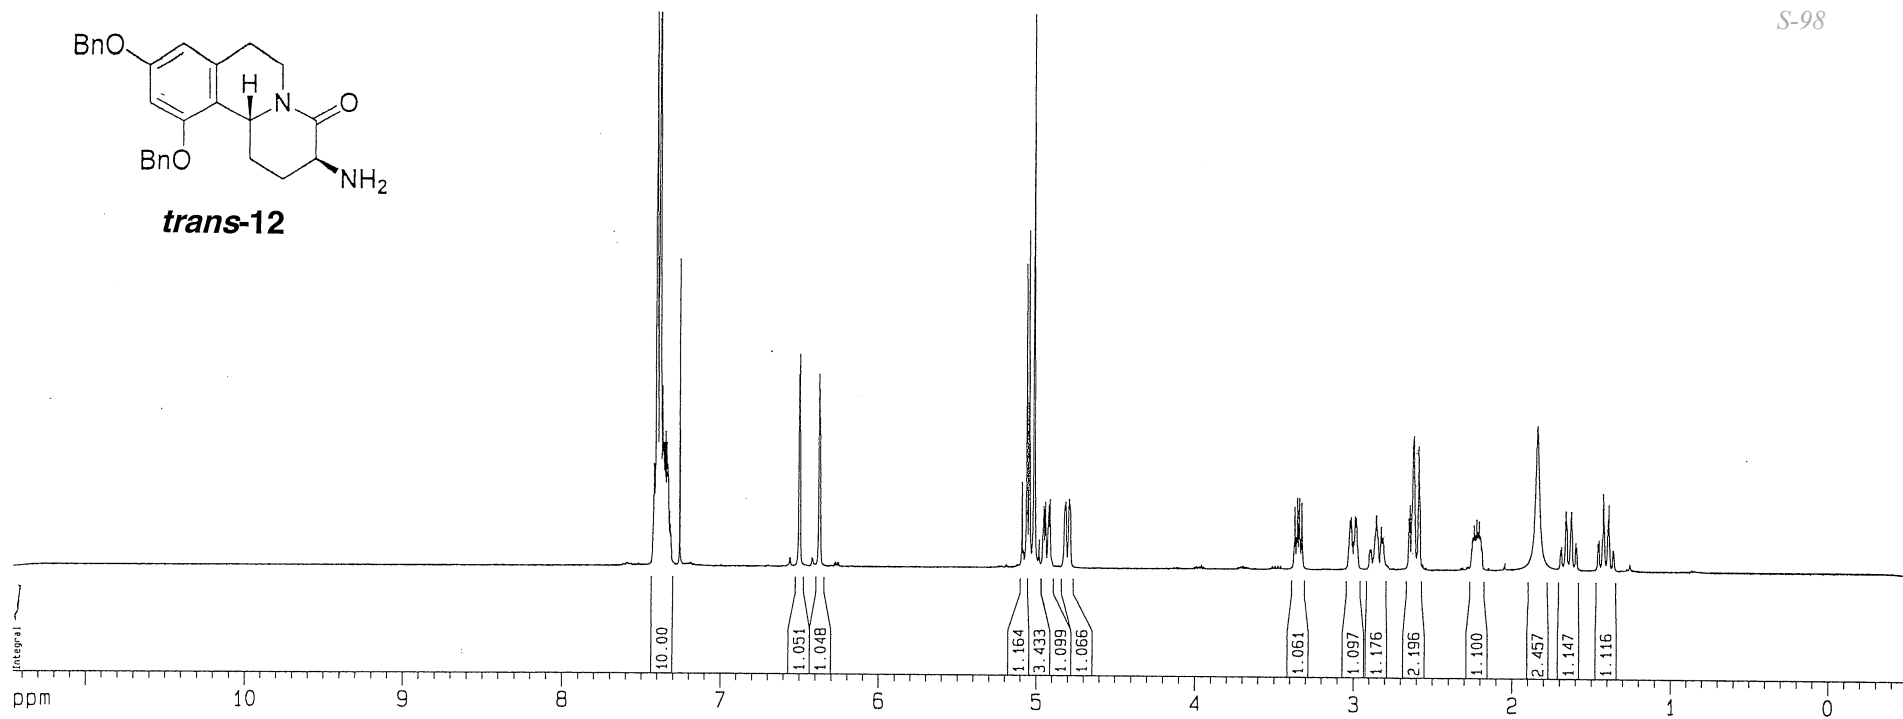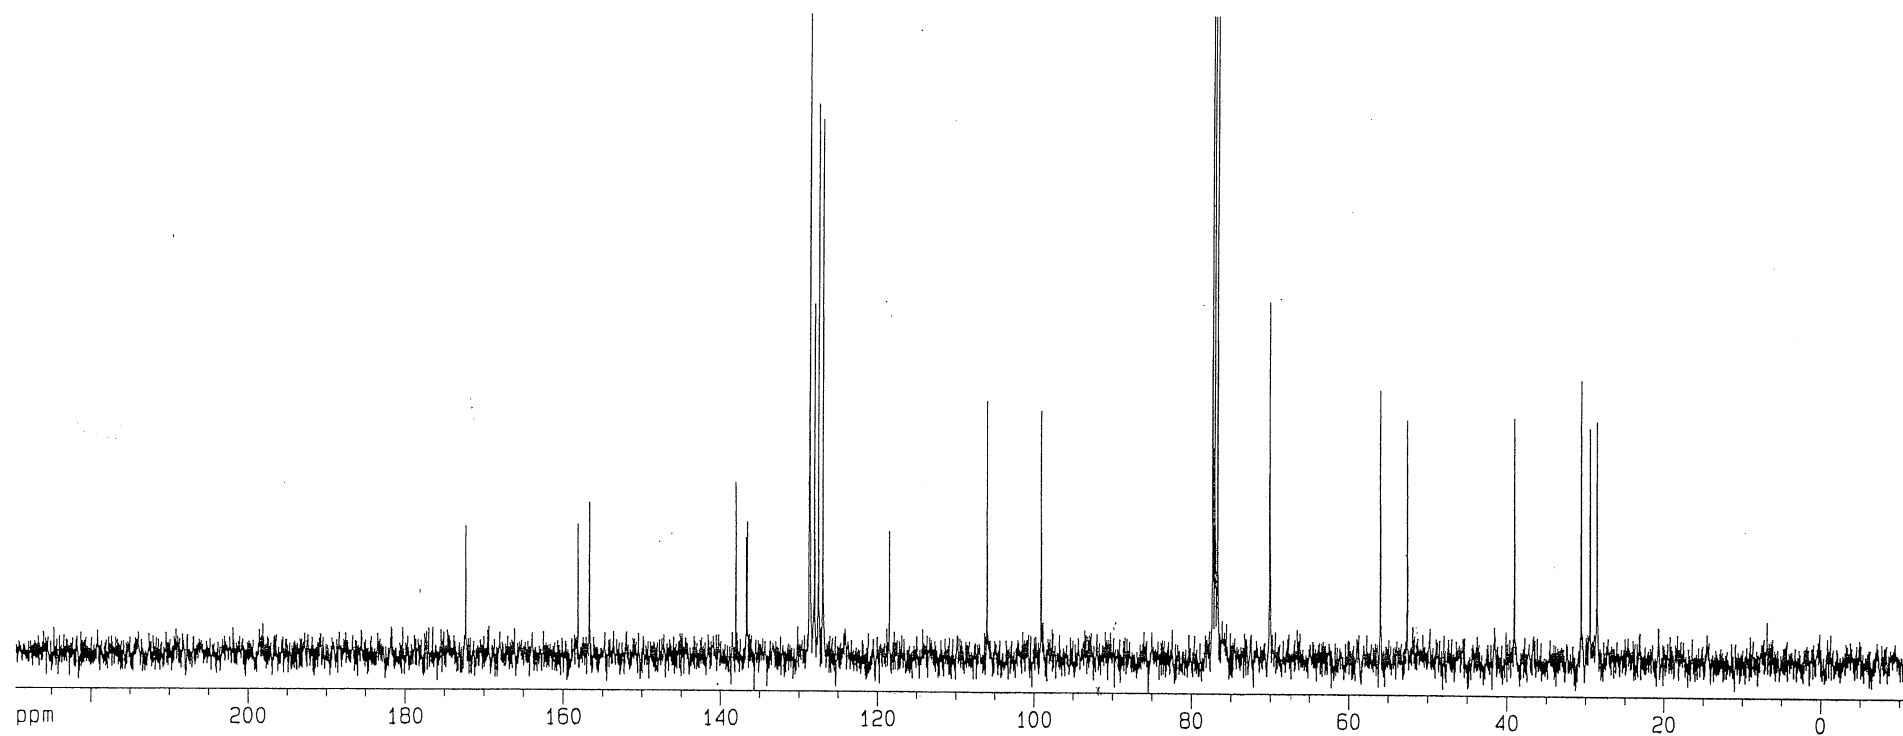

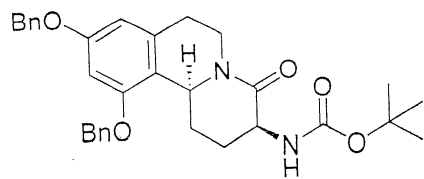***cis-11***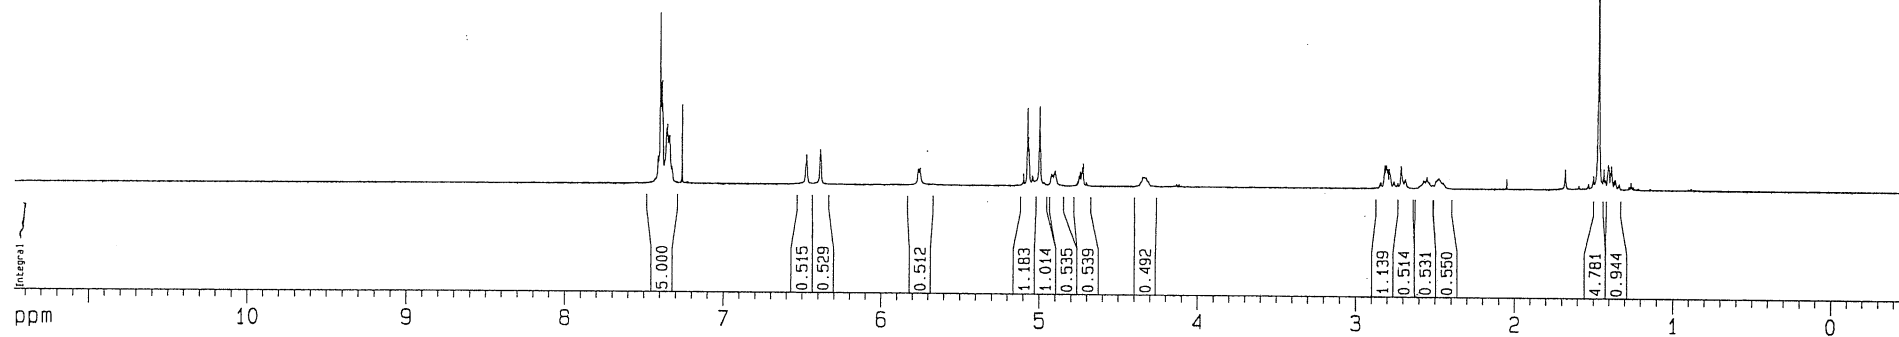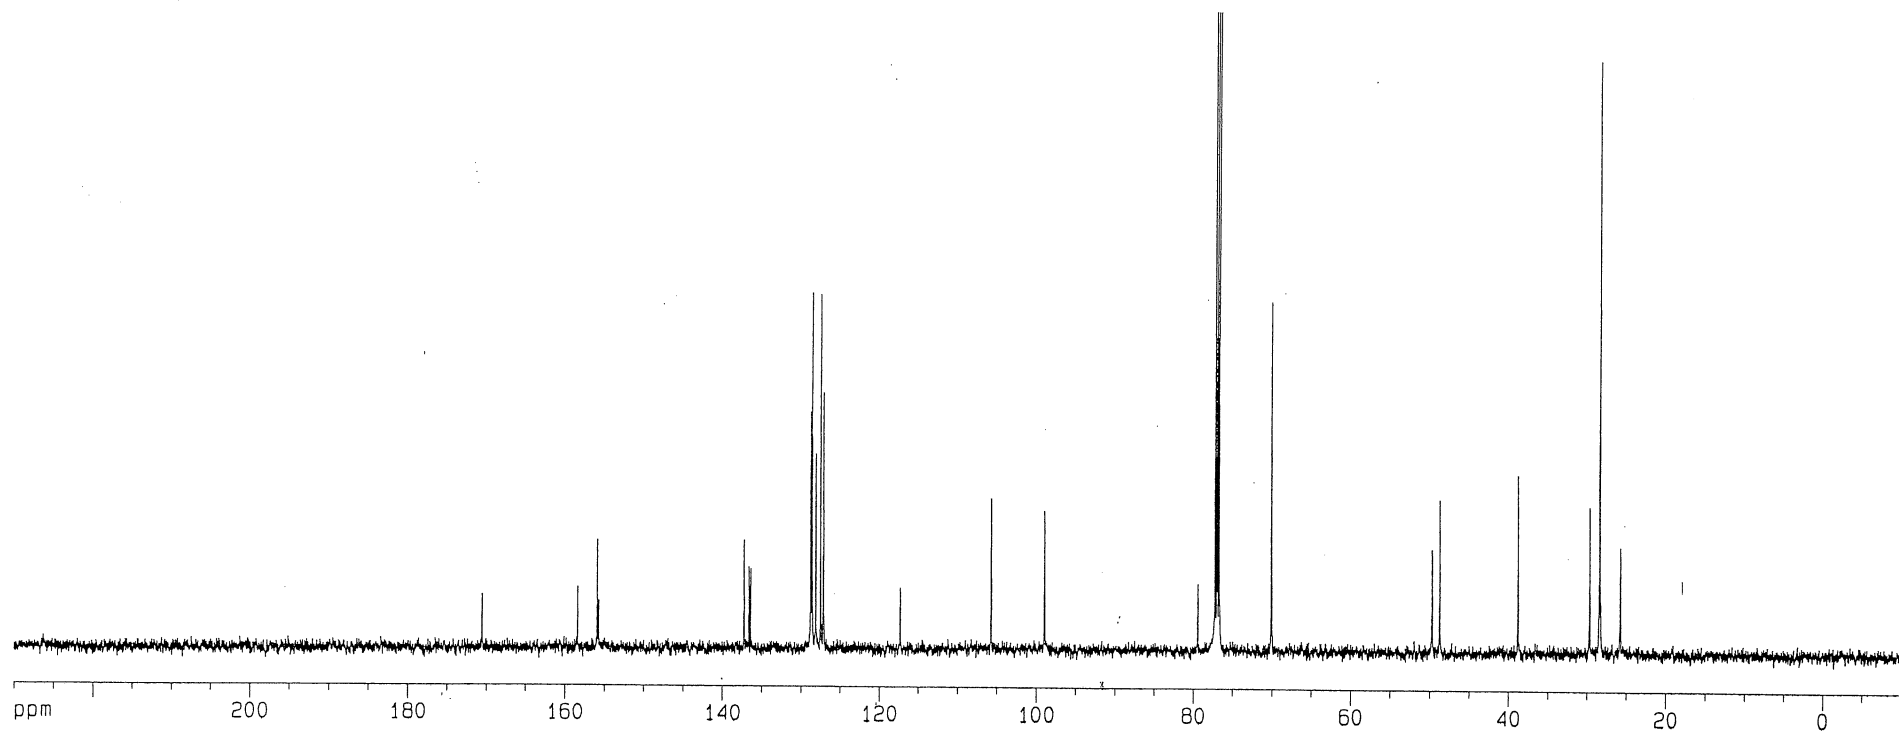

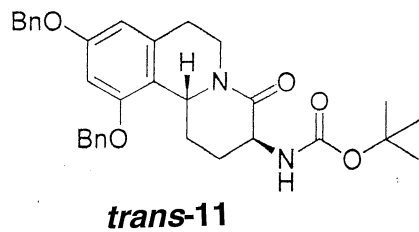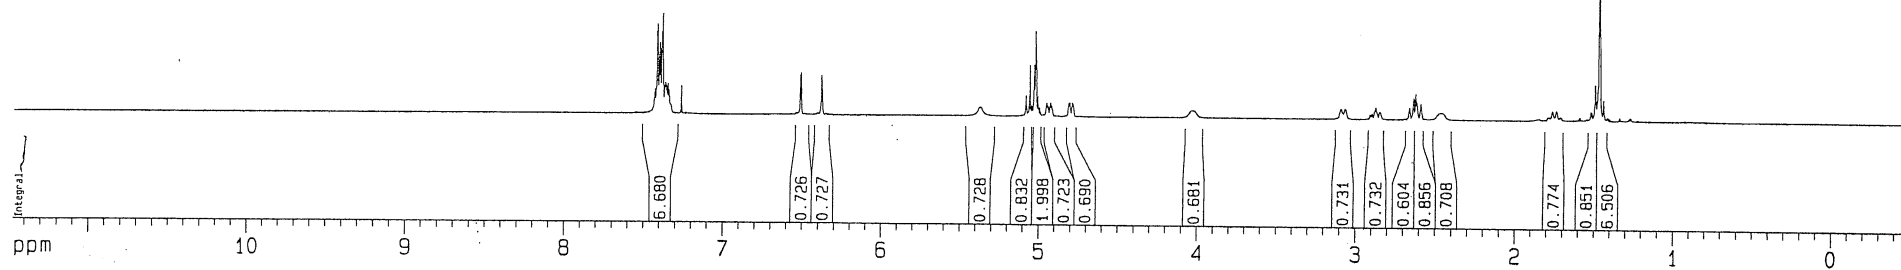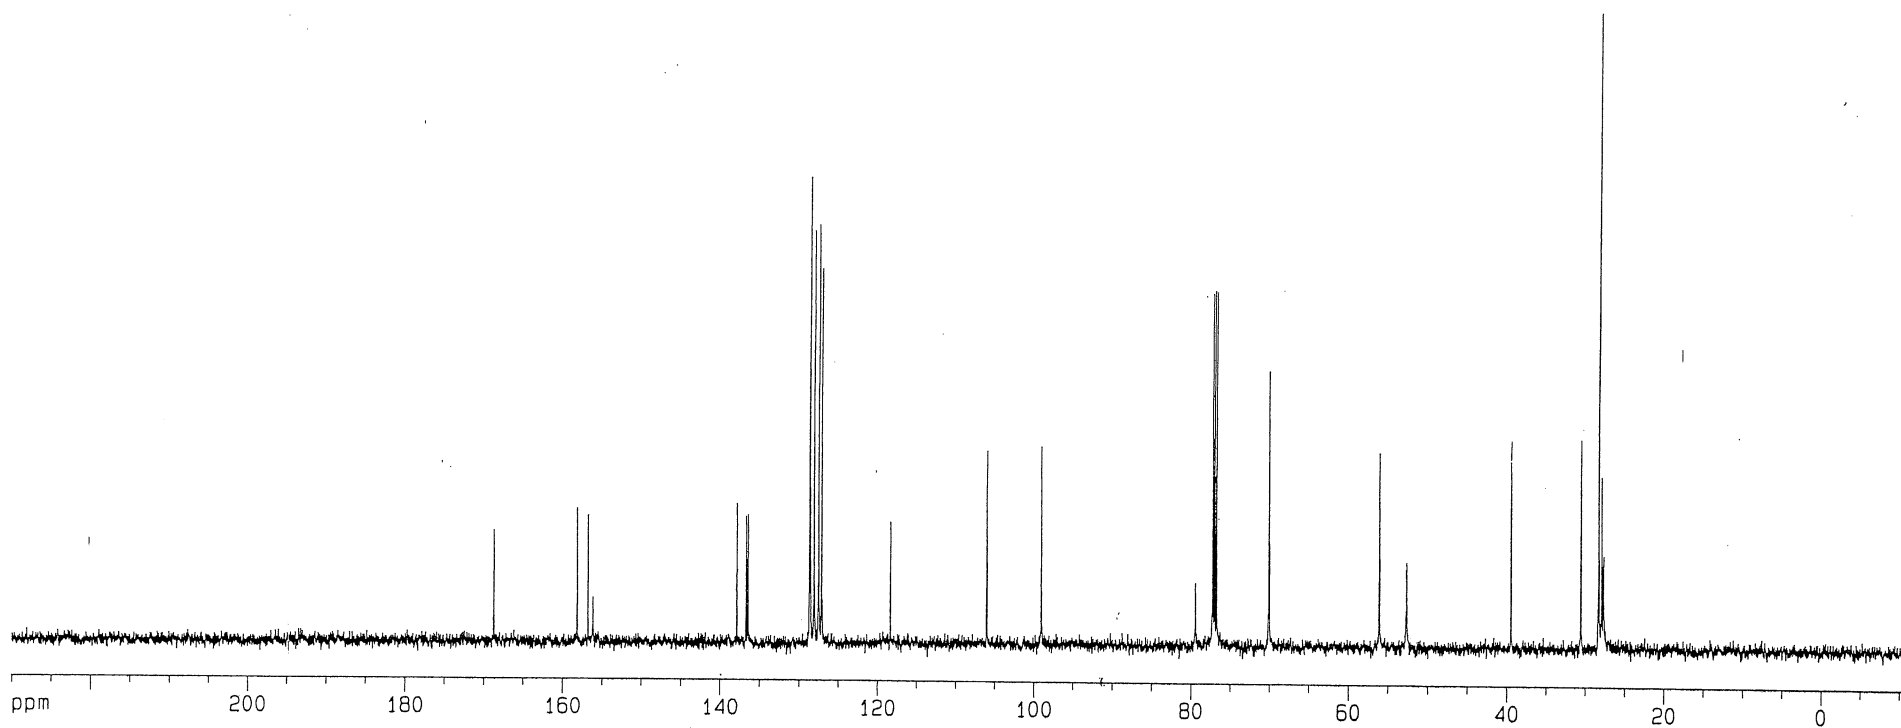

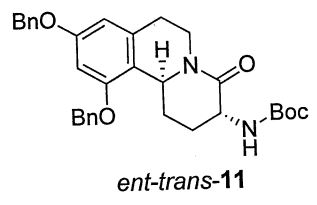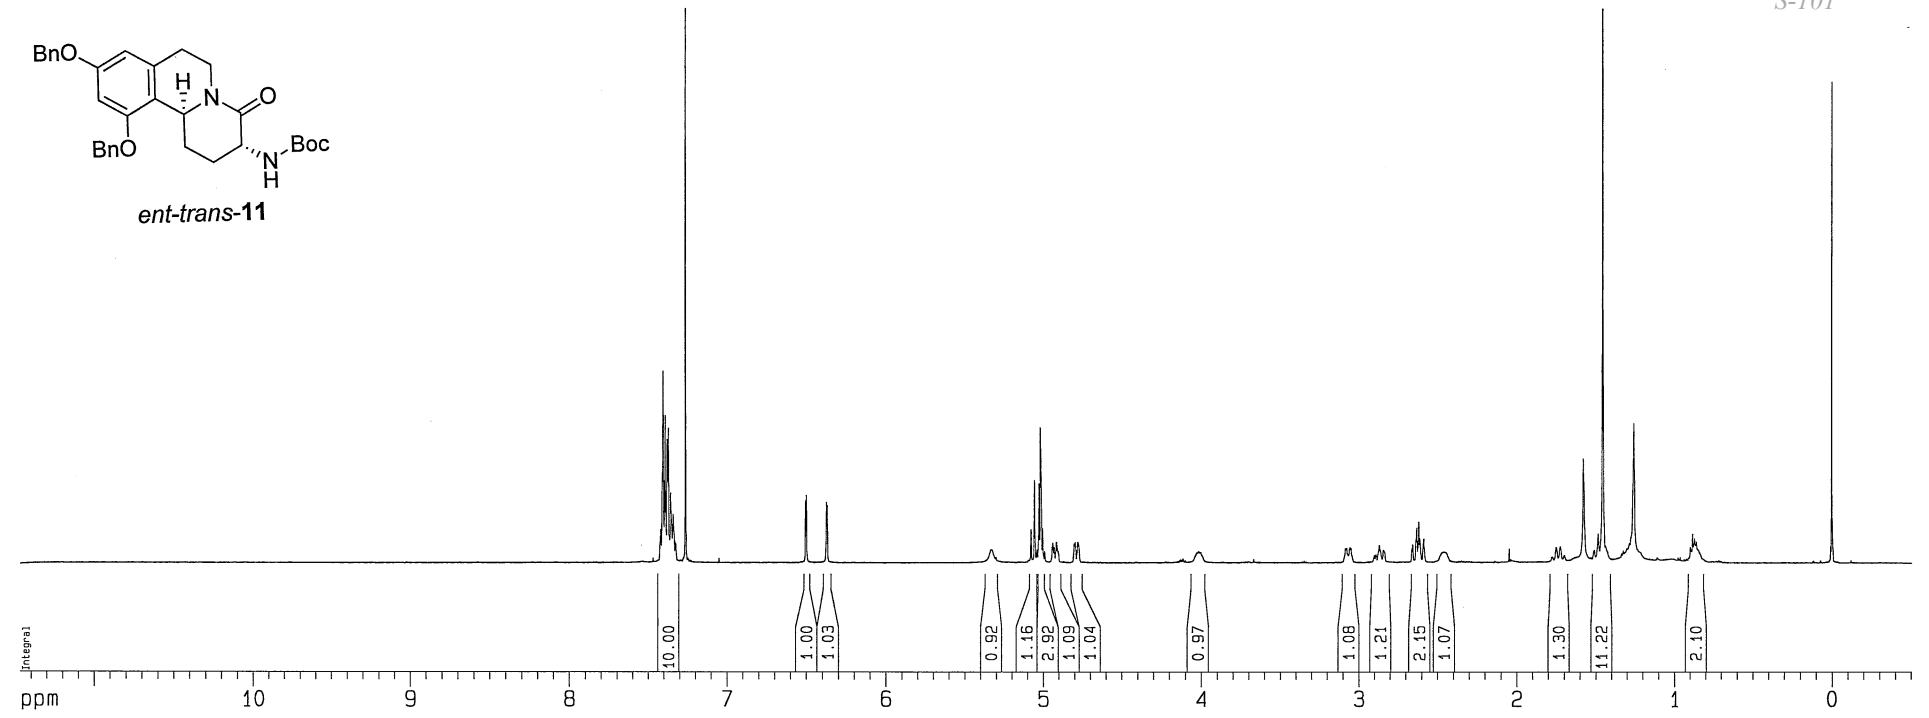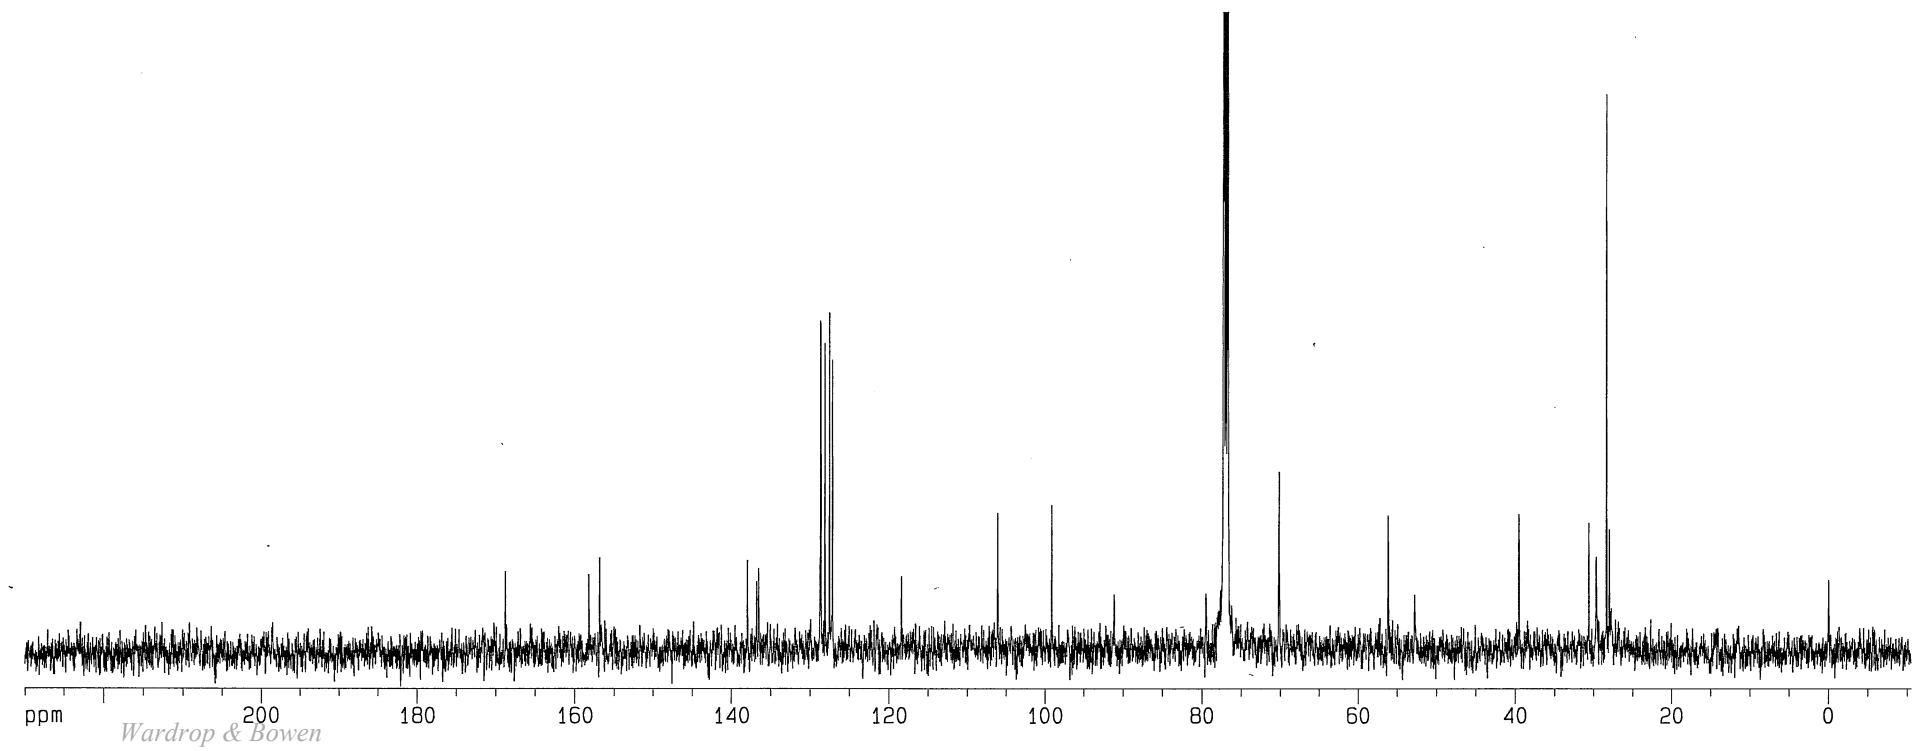

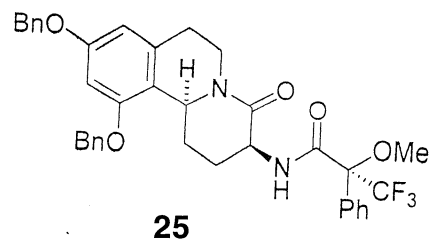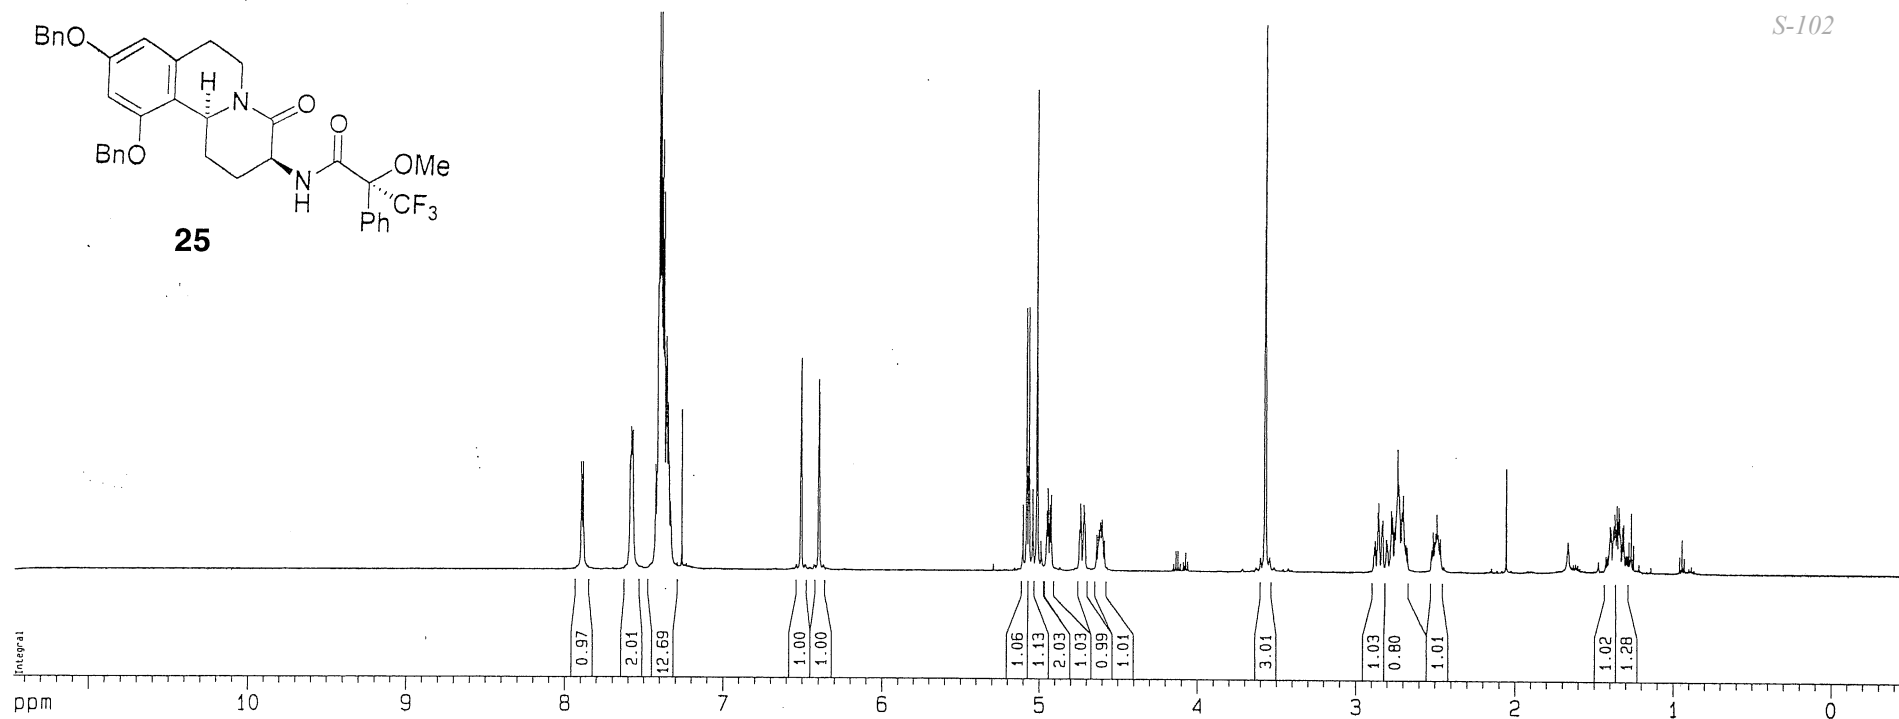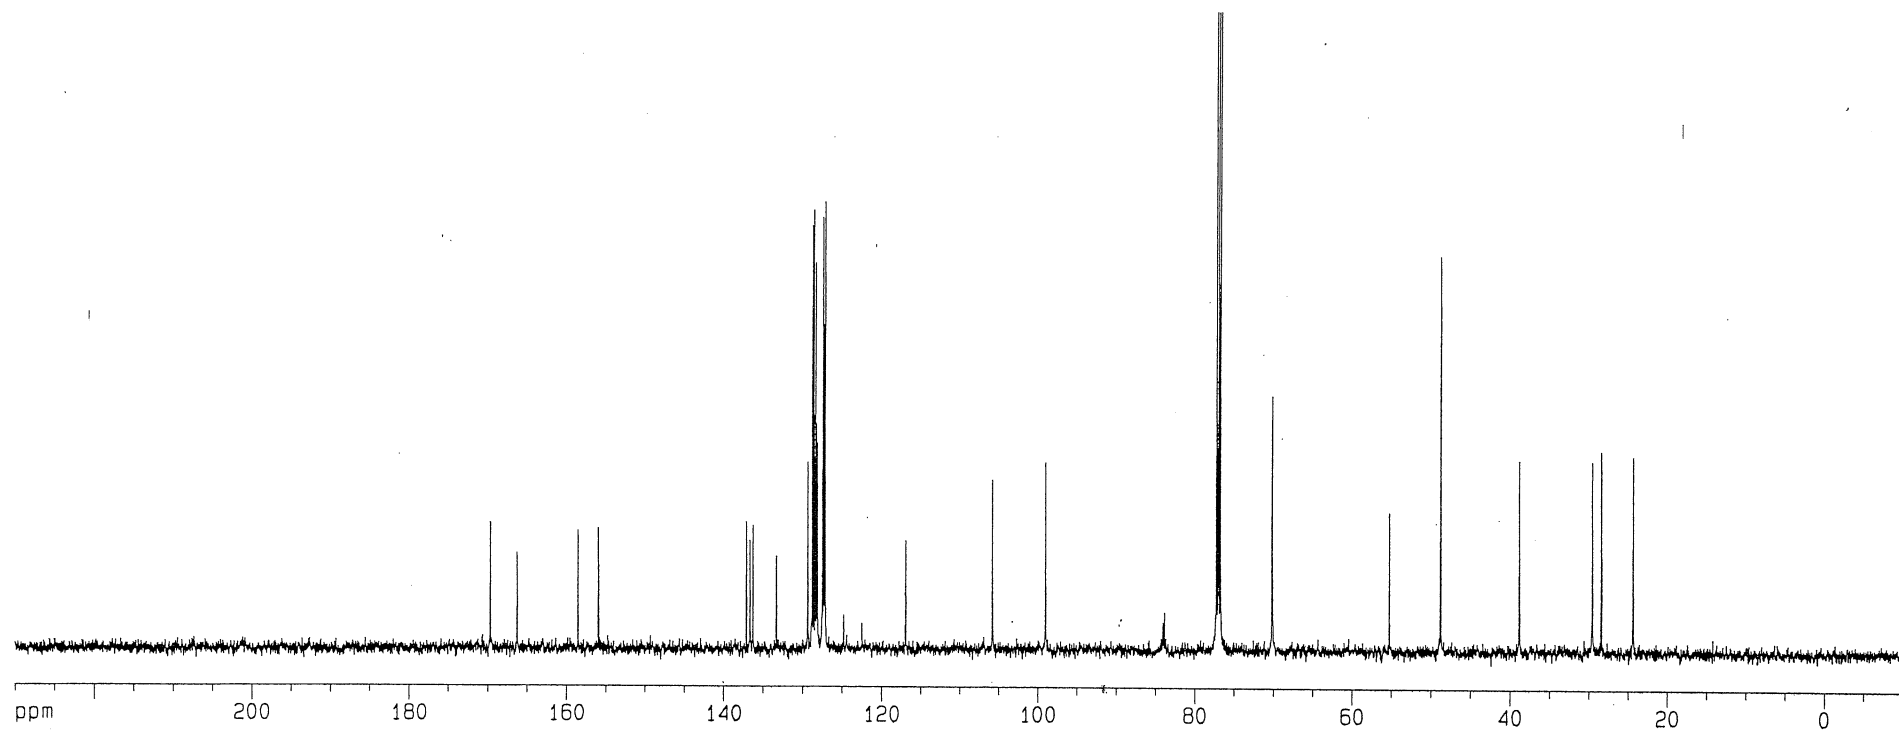

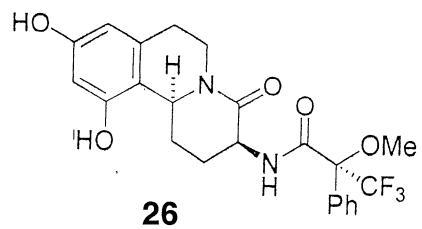

26

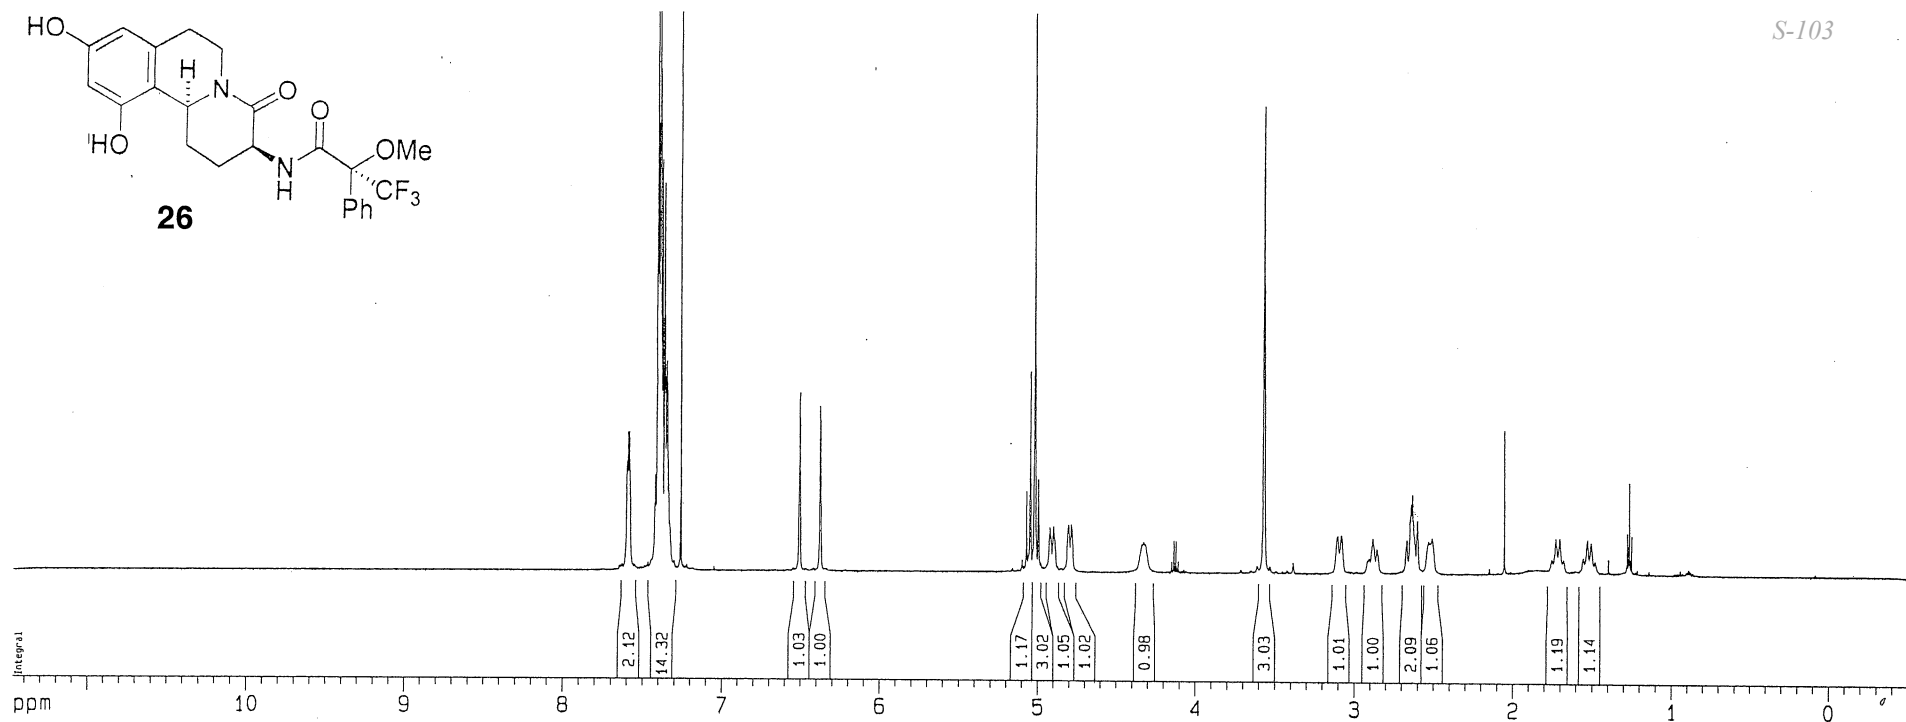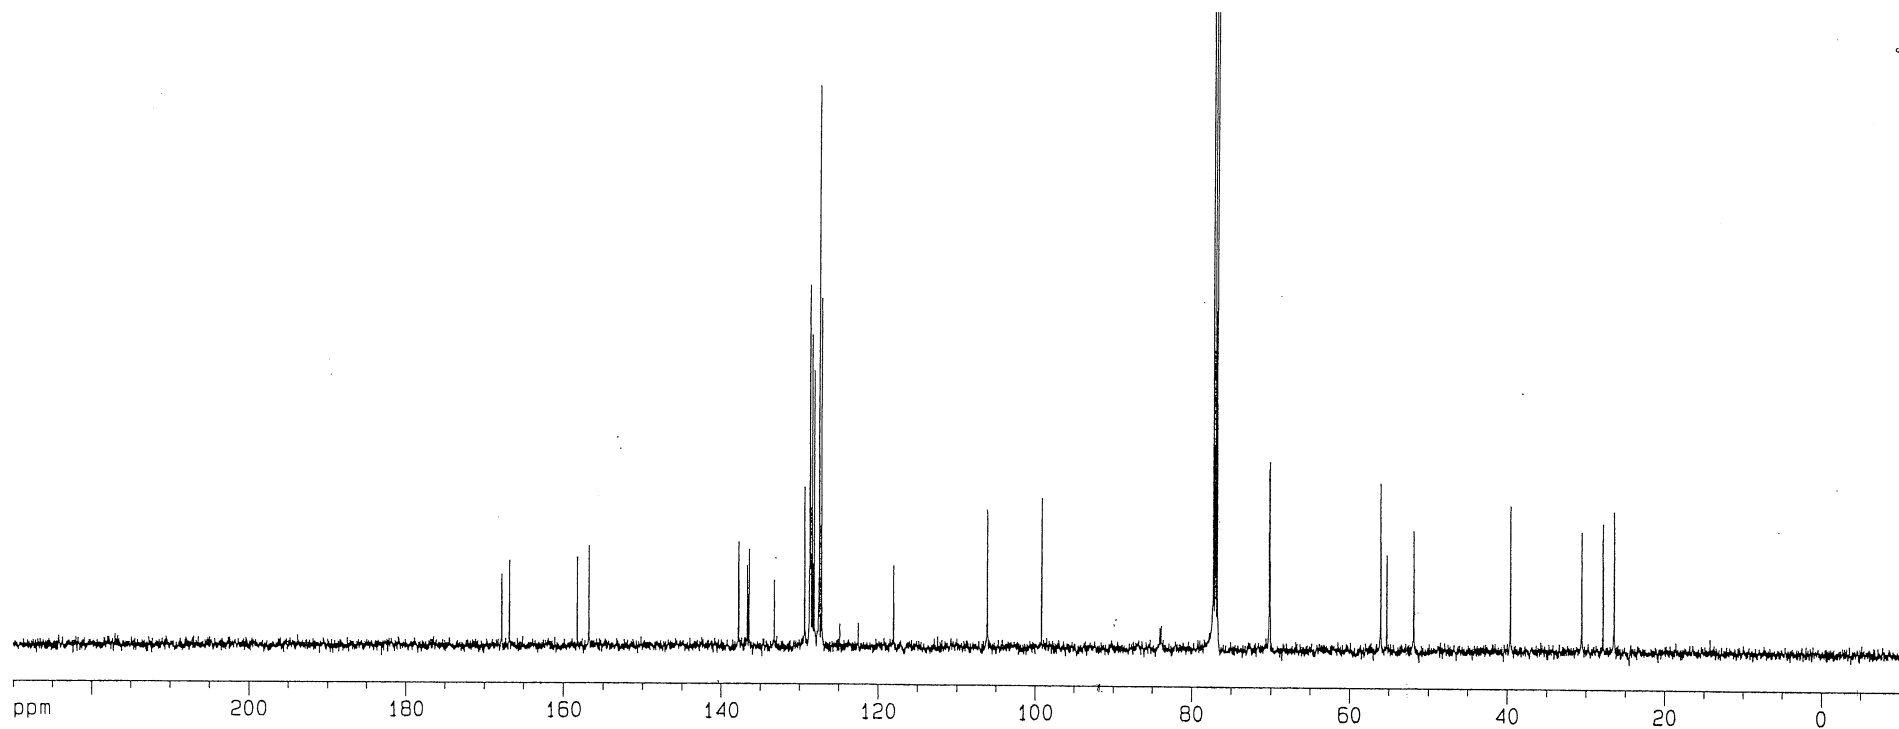

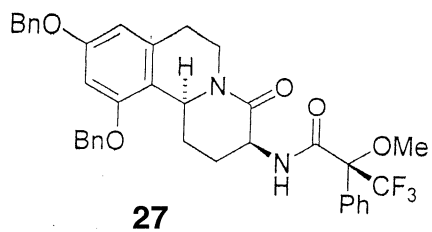

27

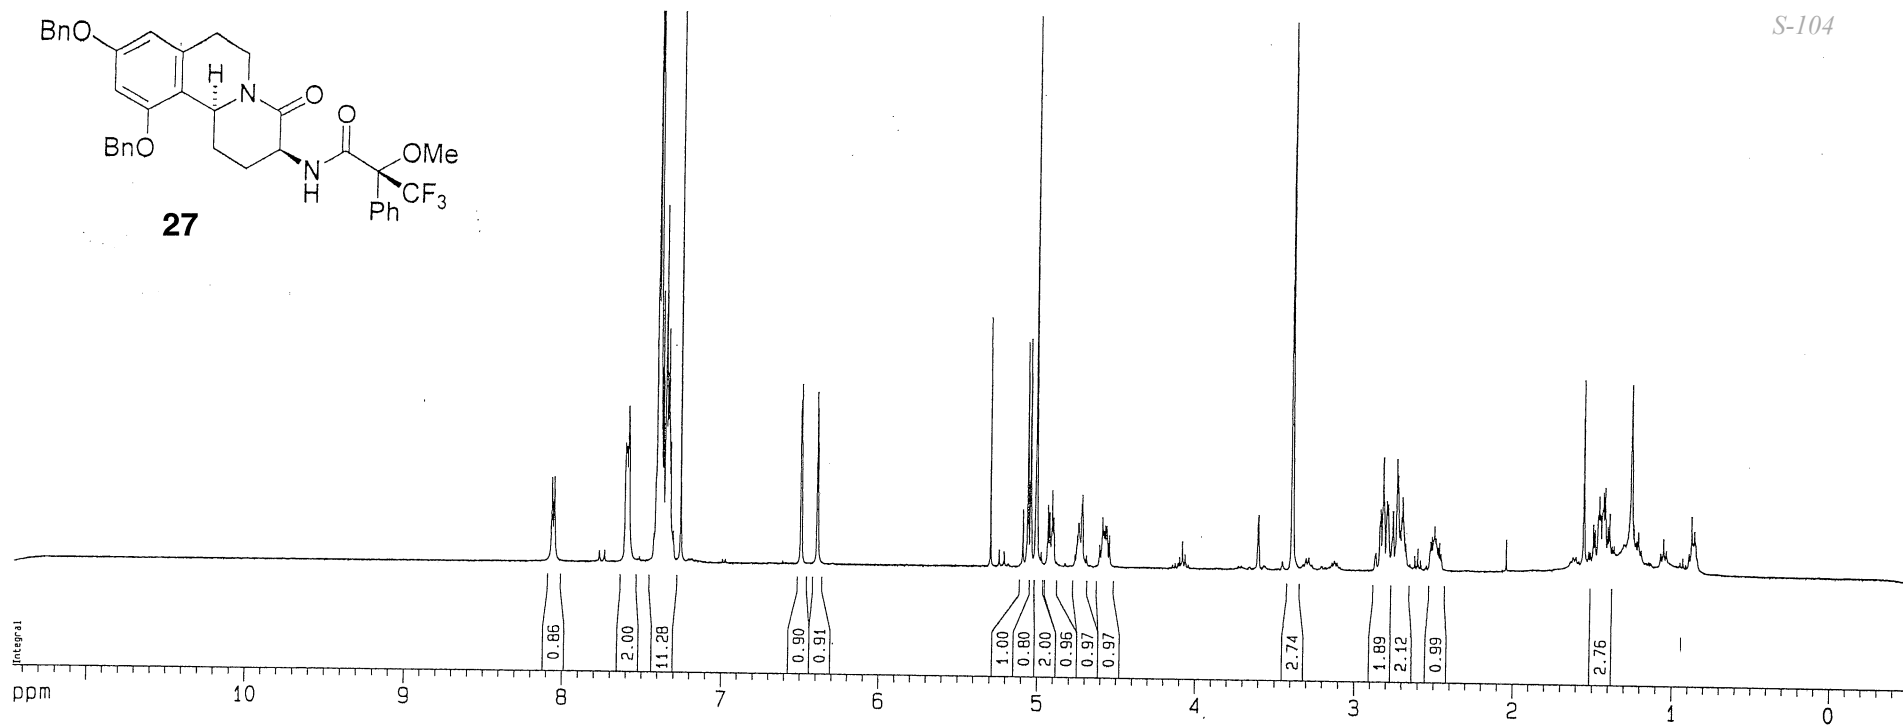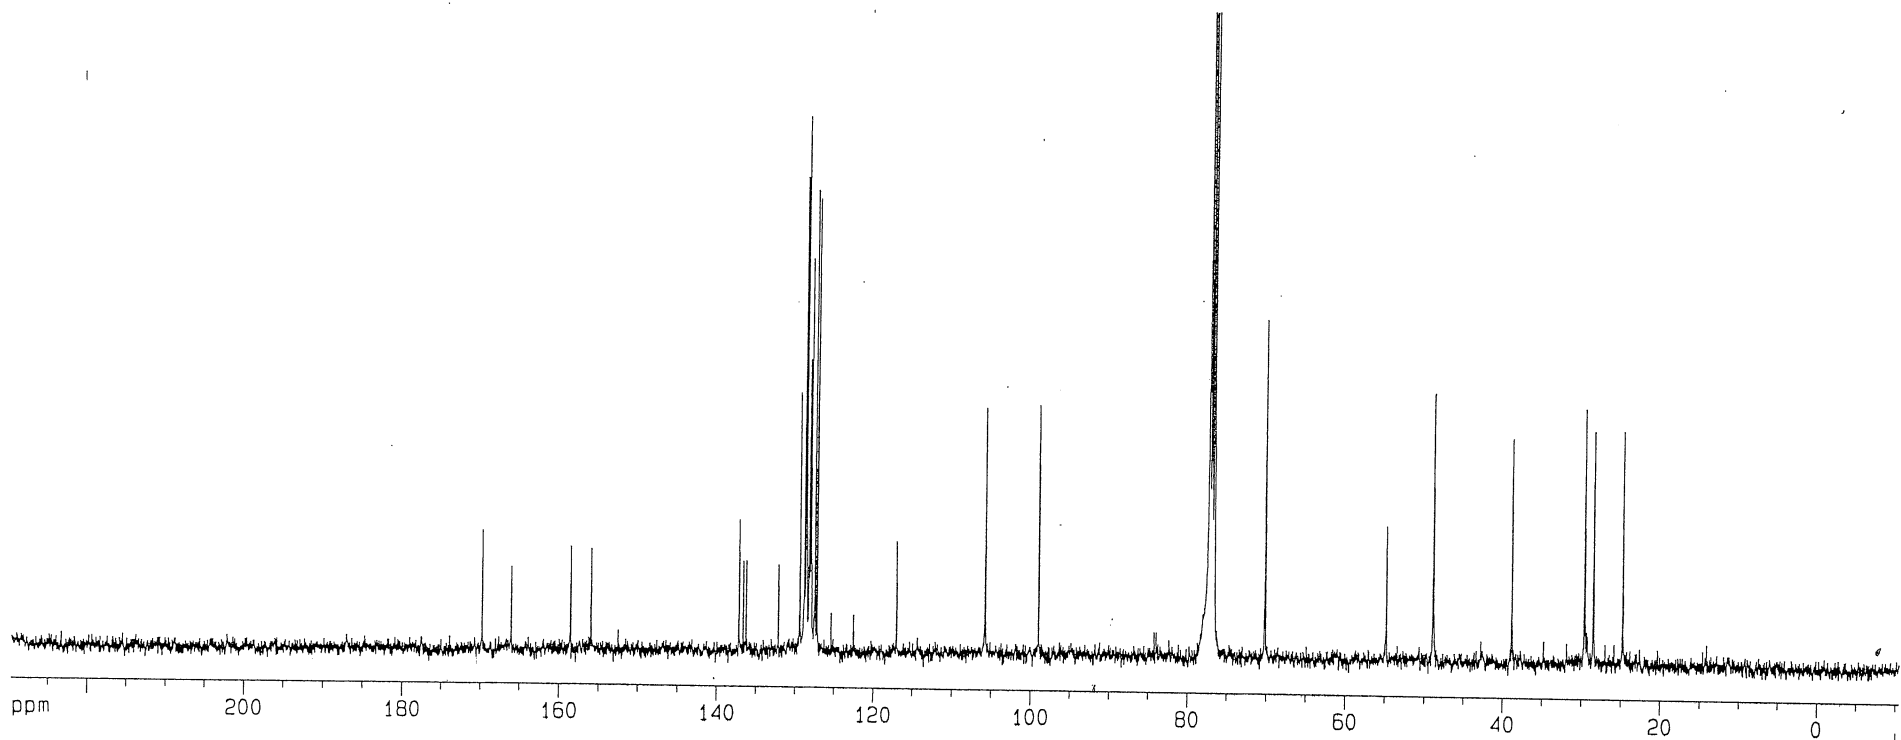



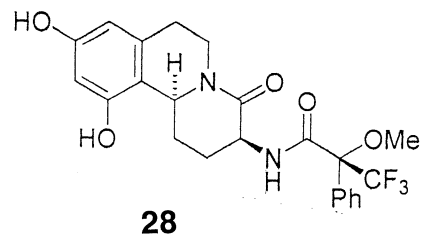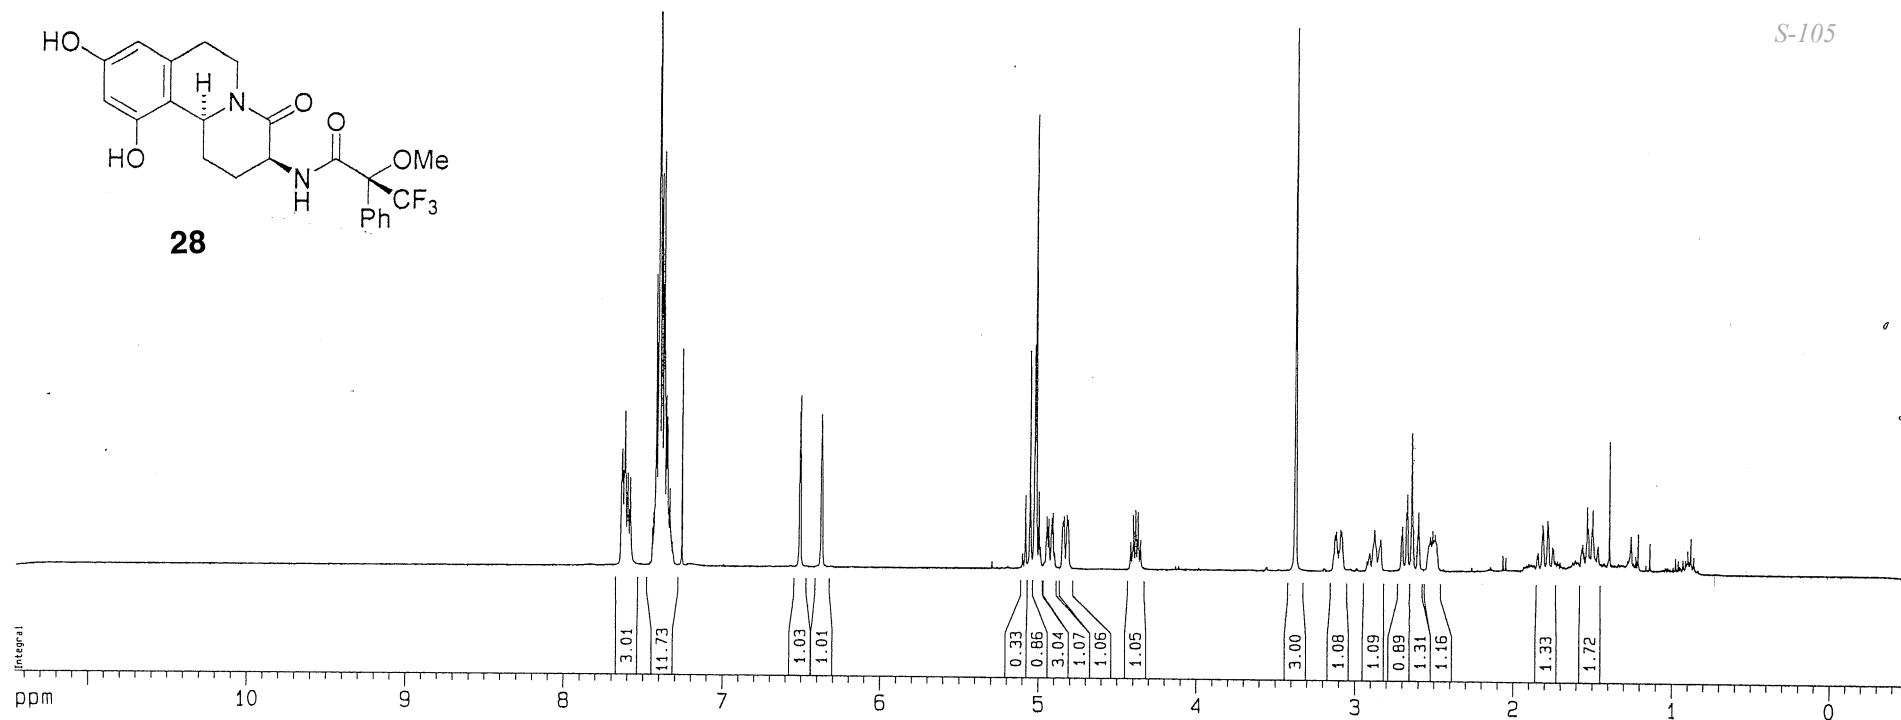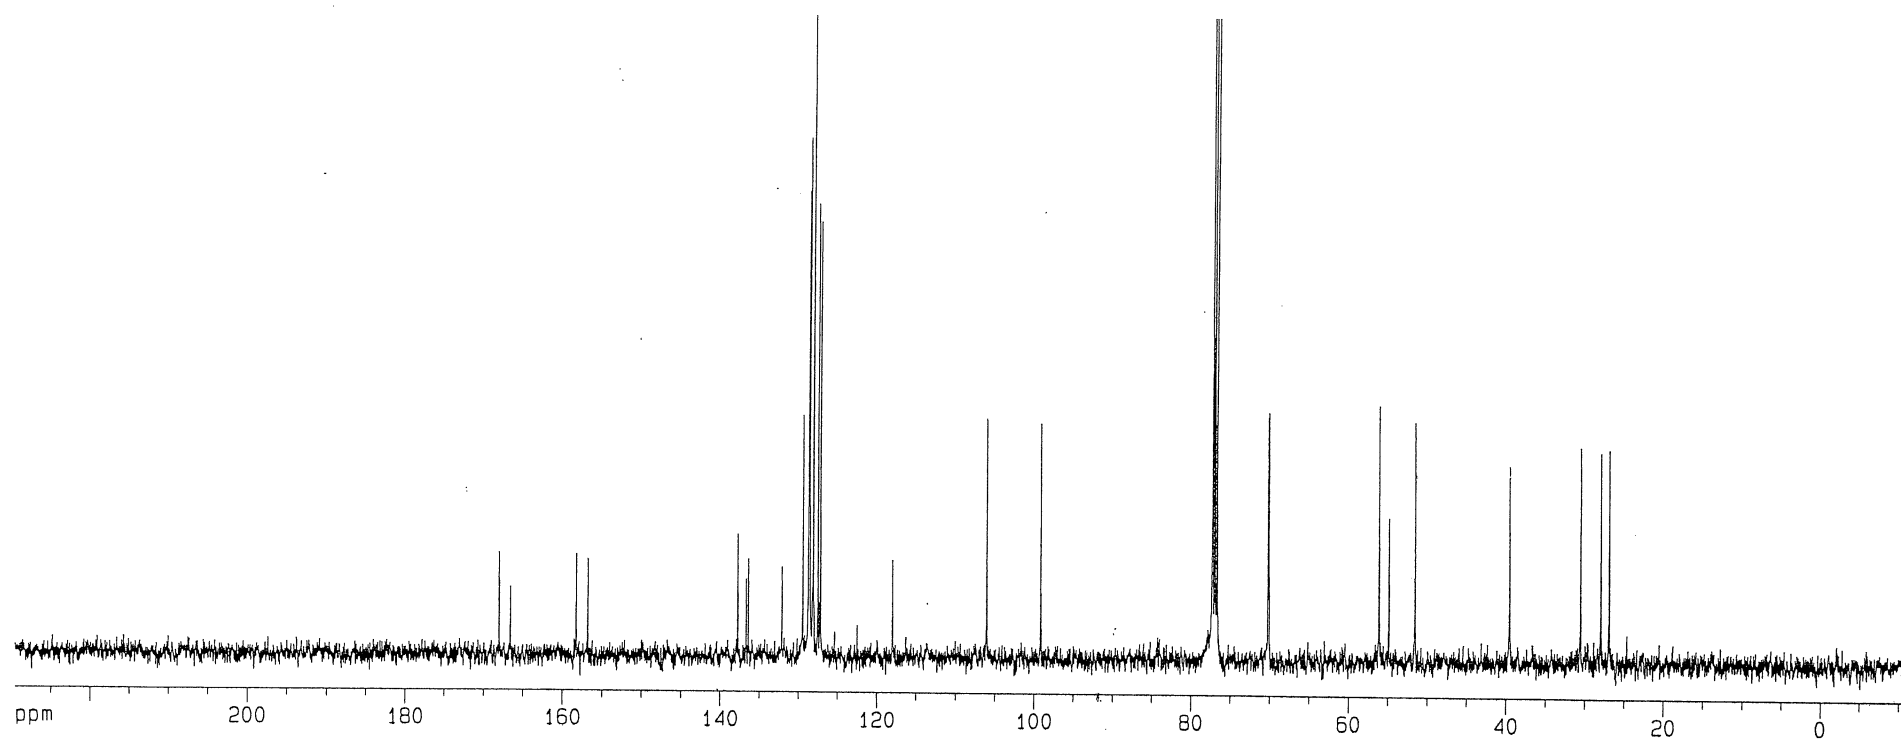

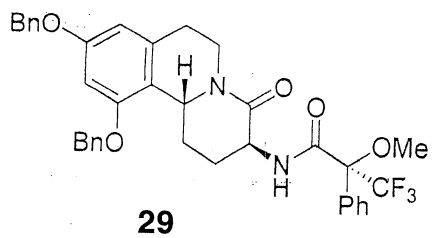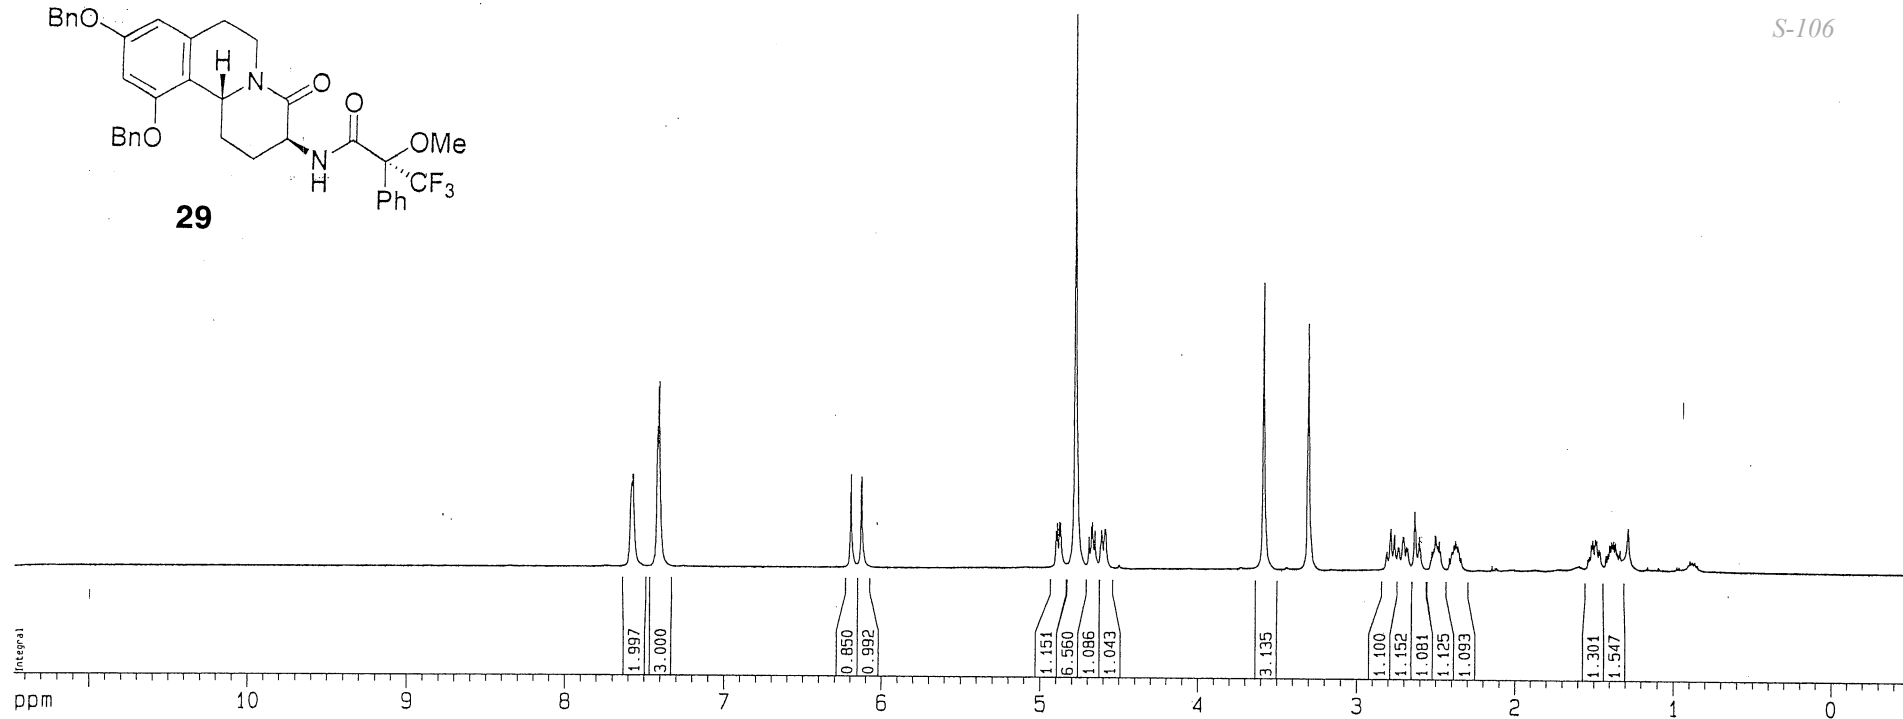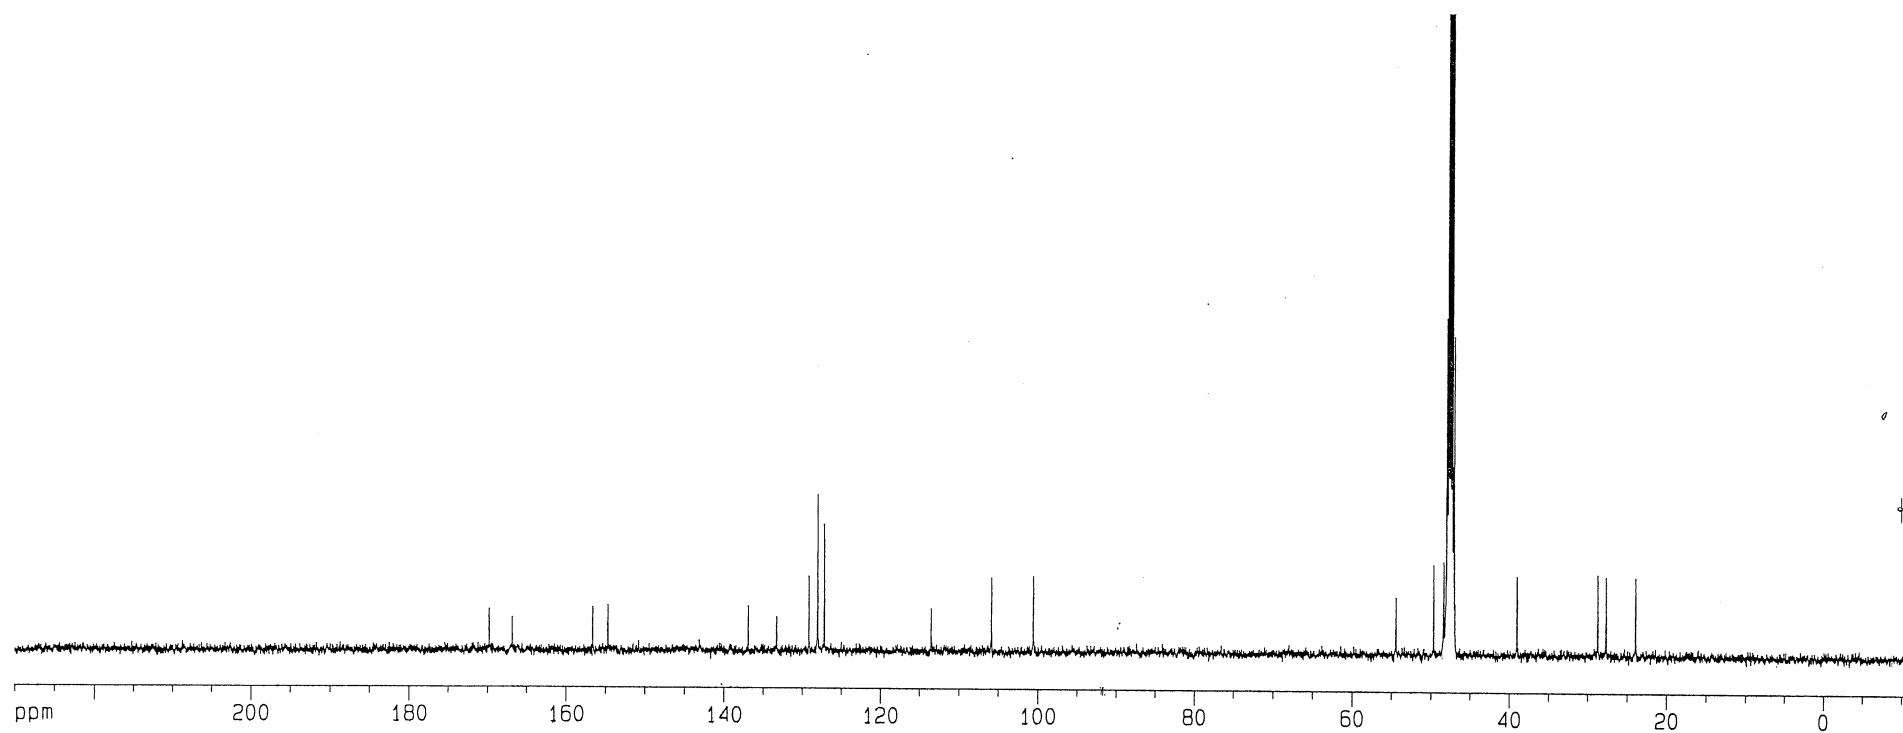

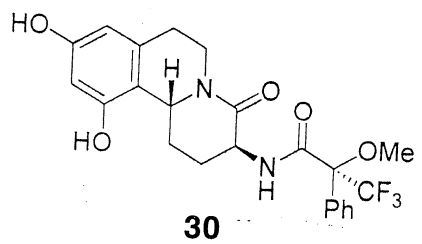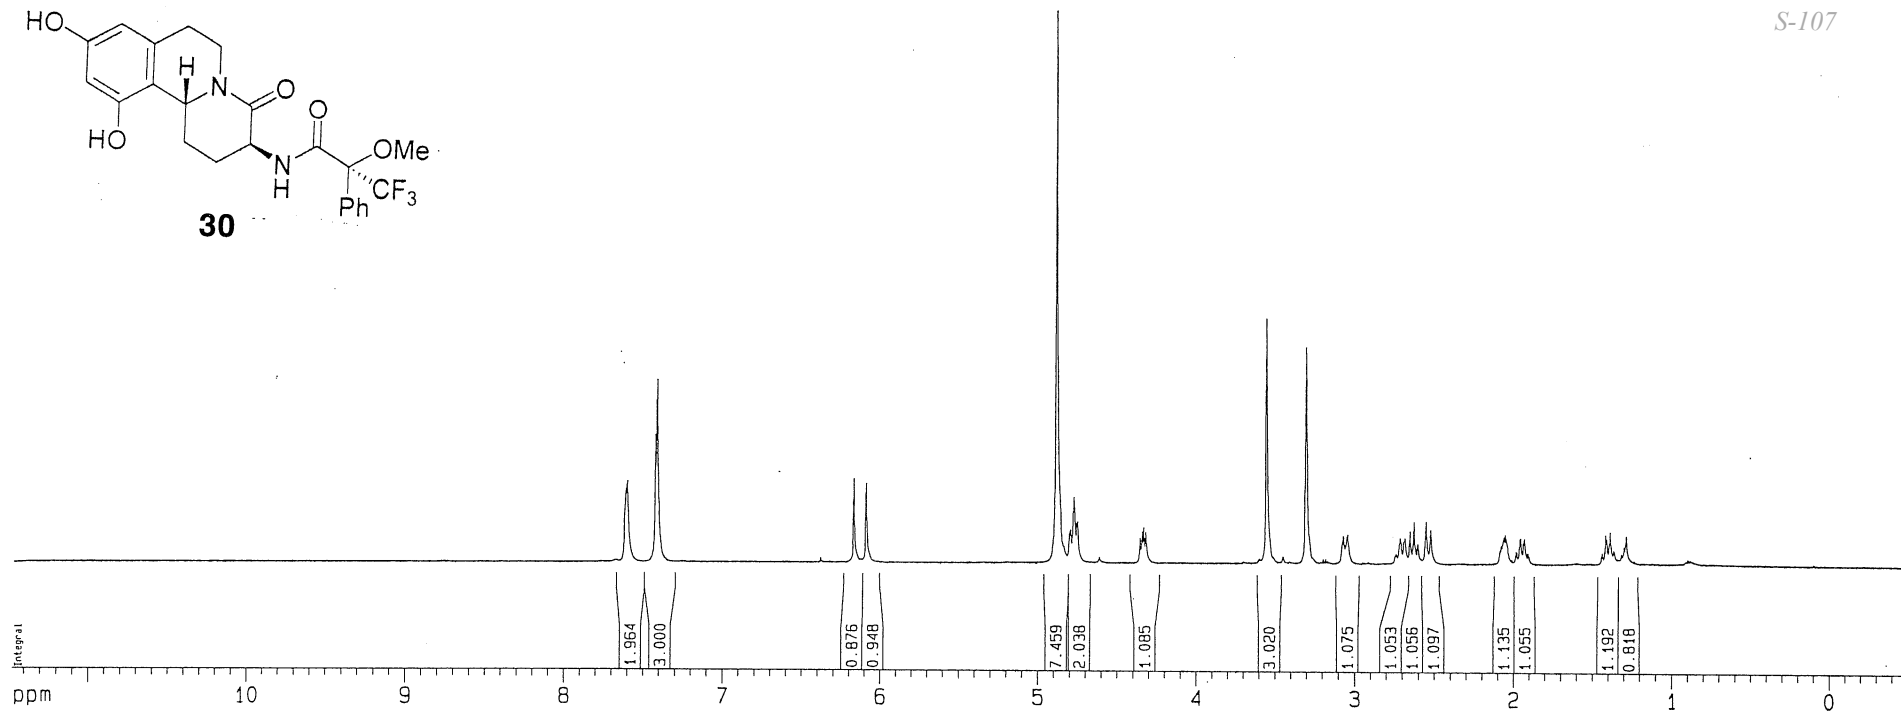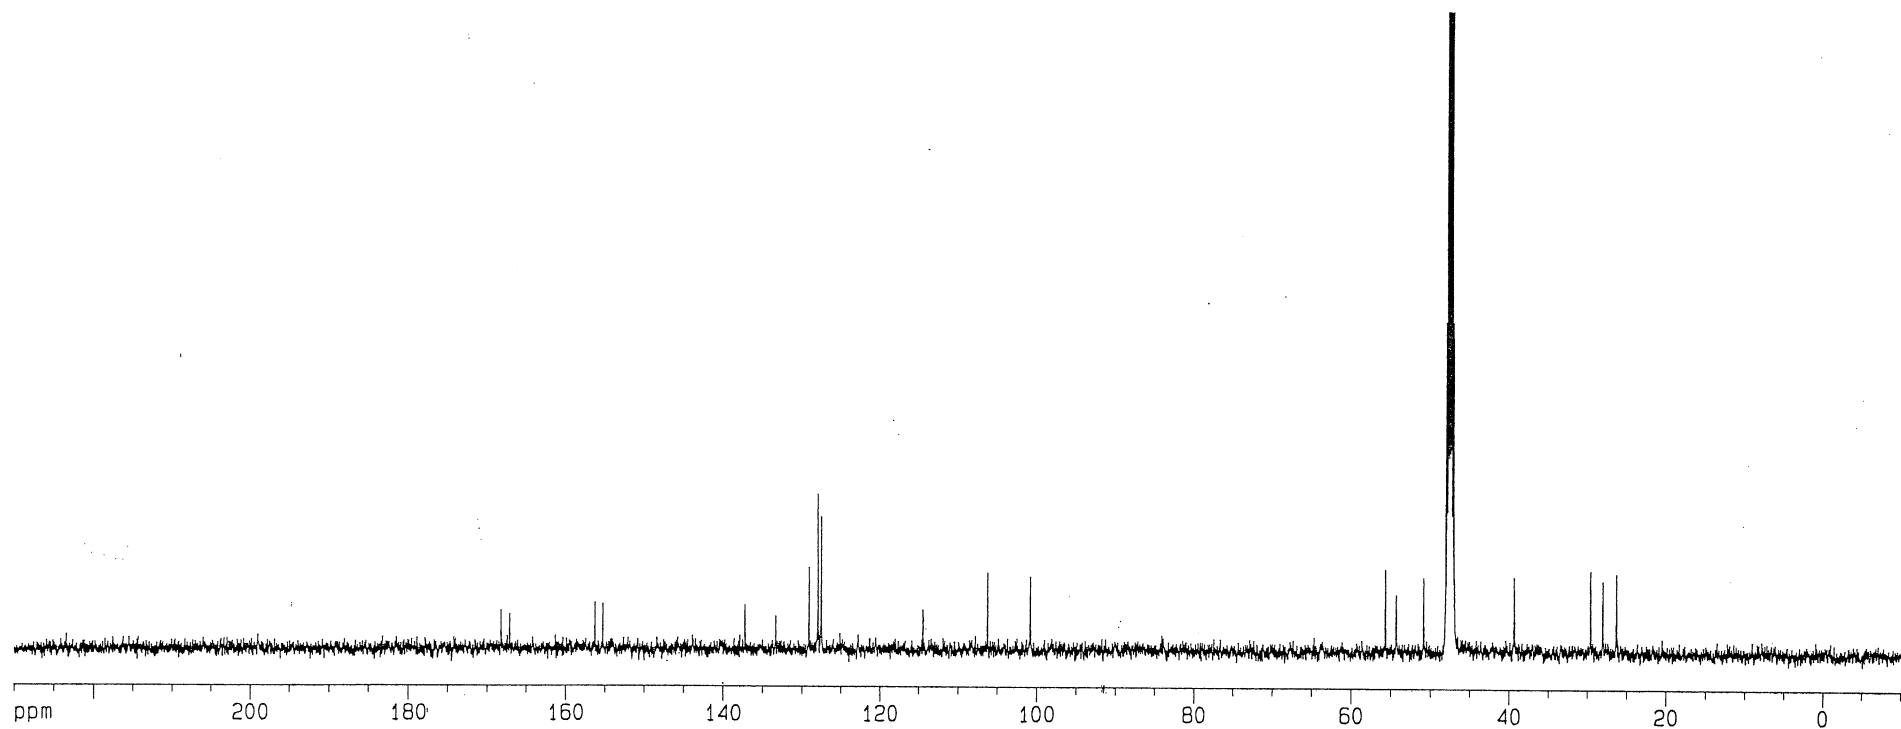

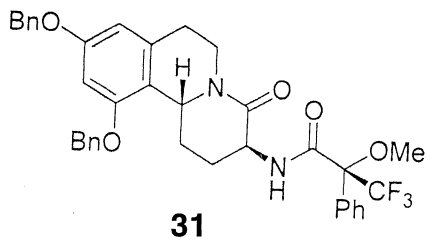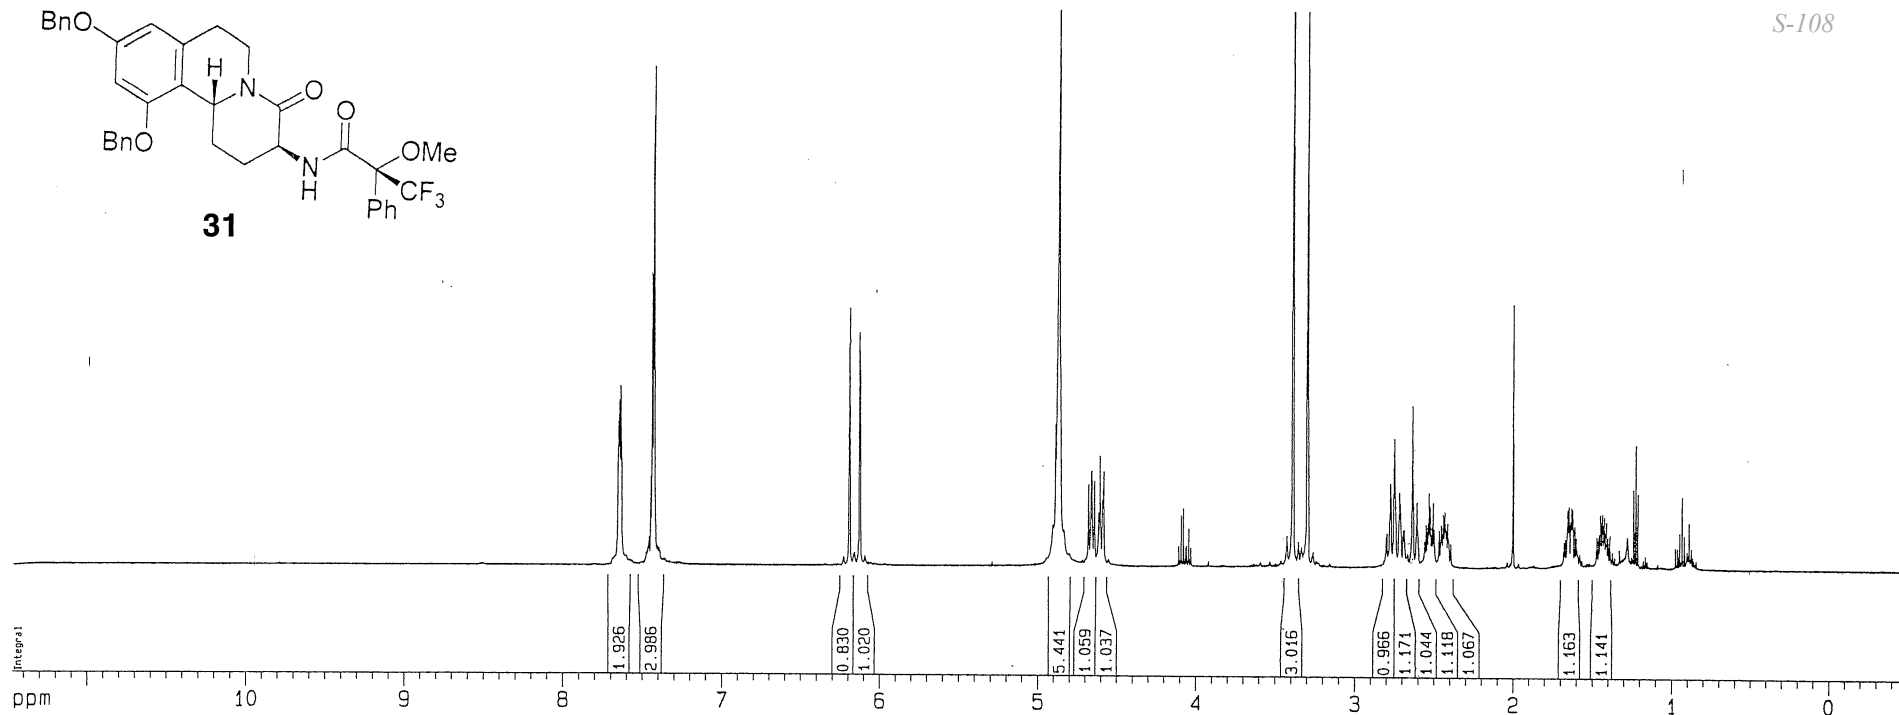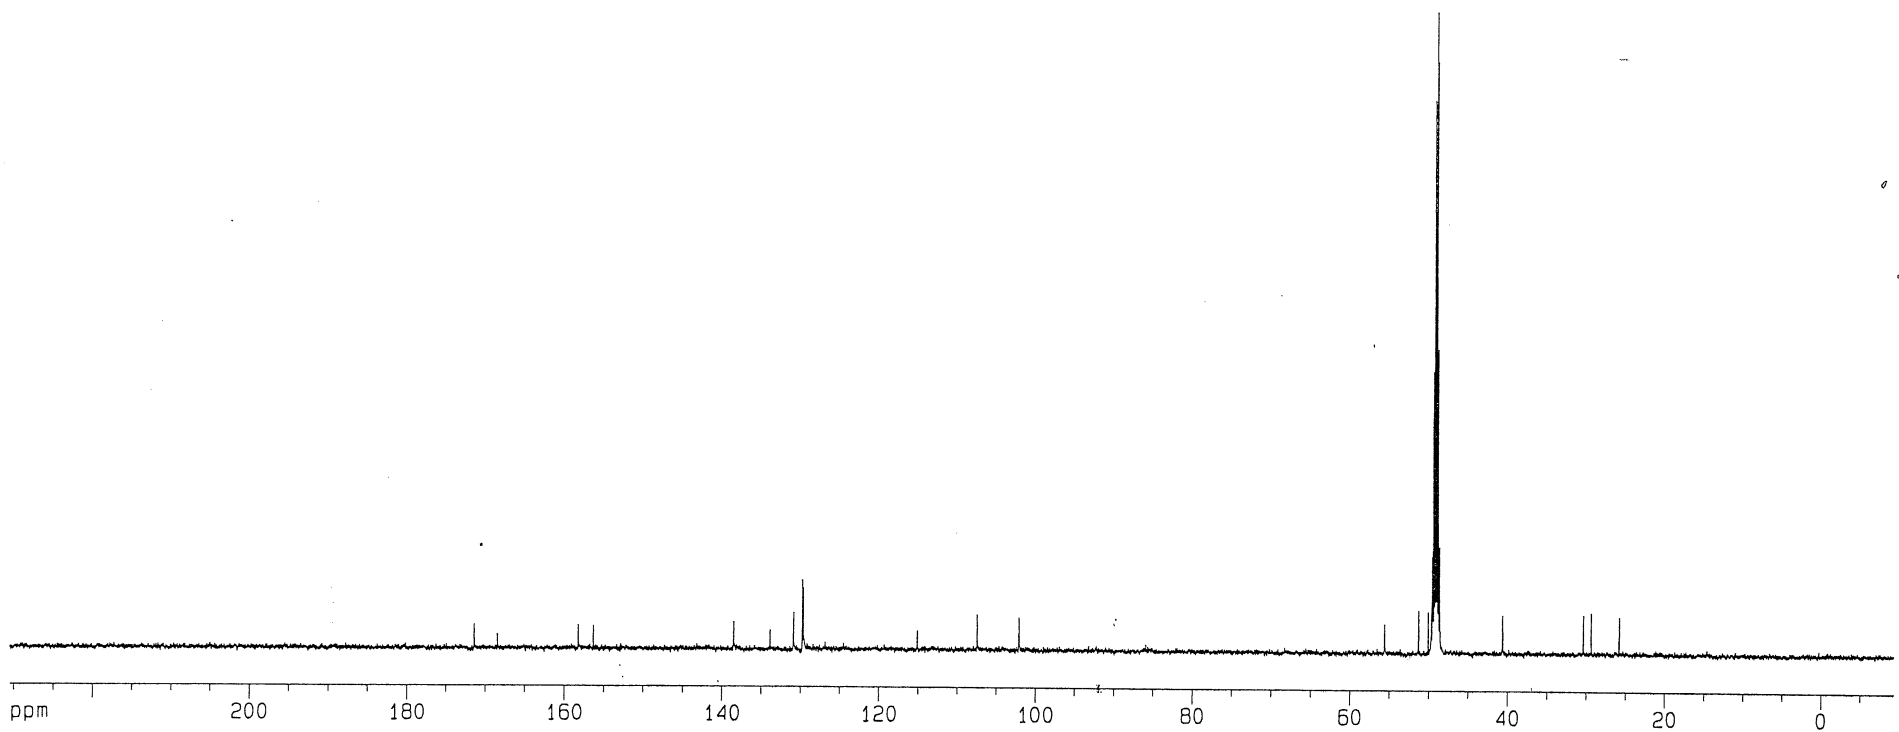

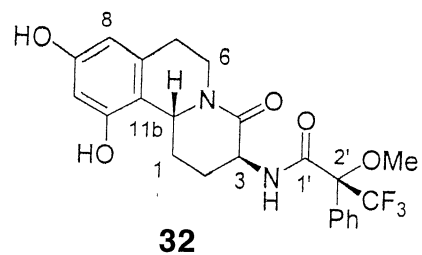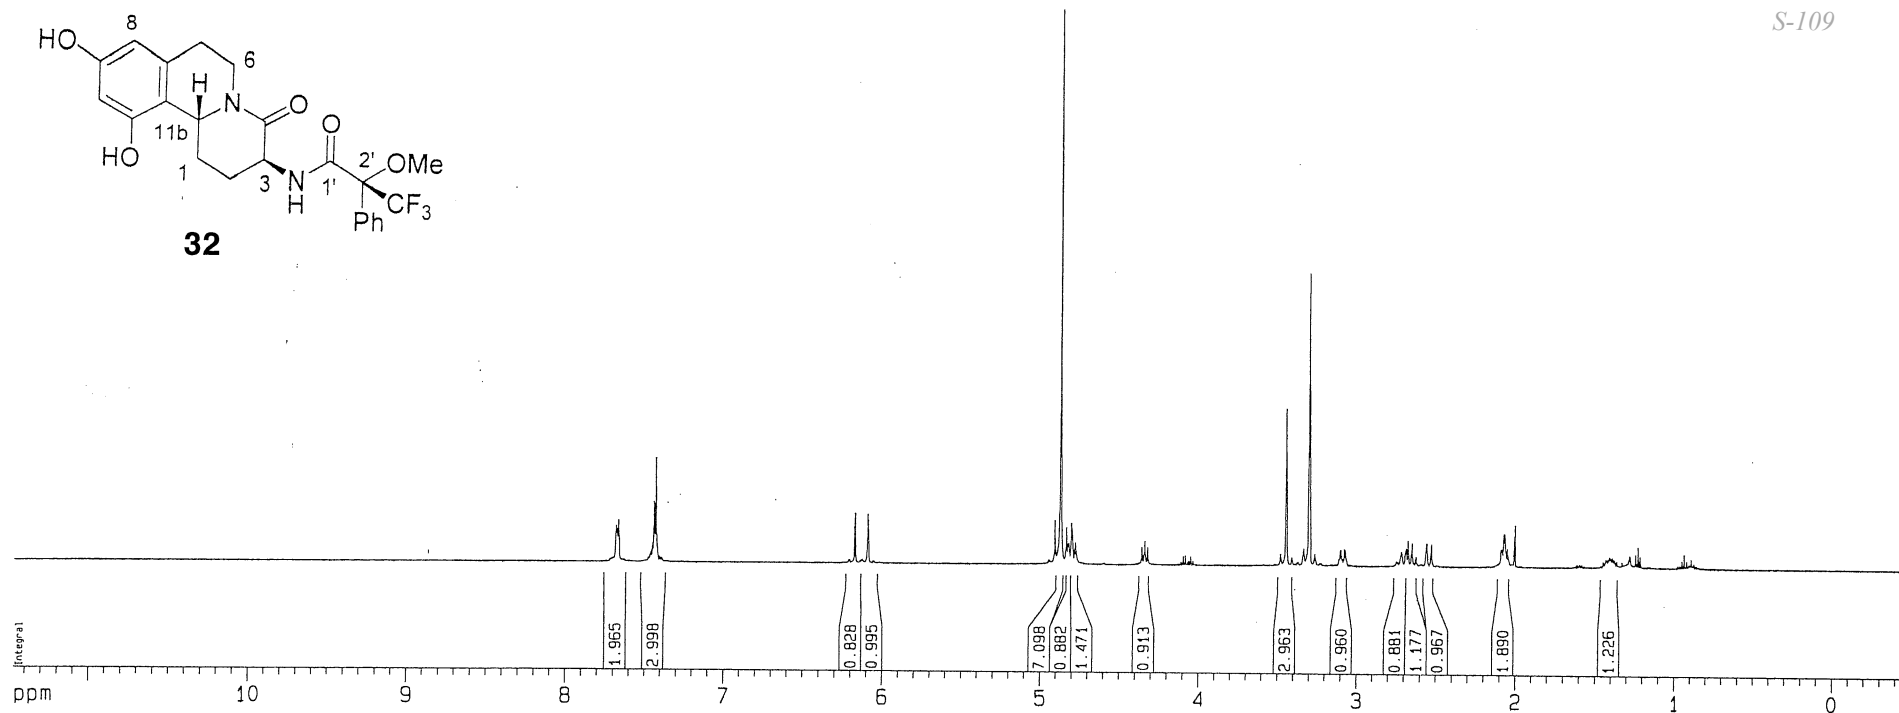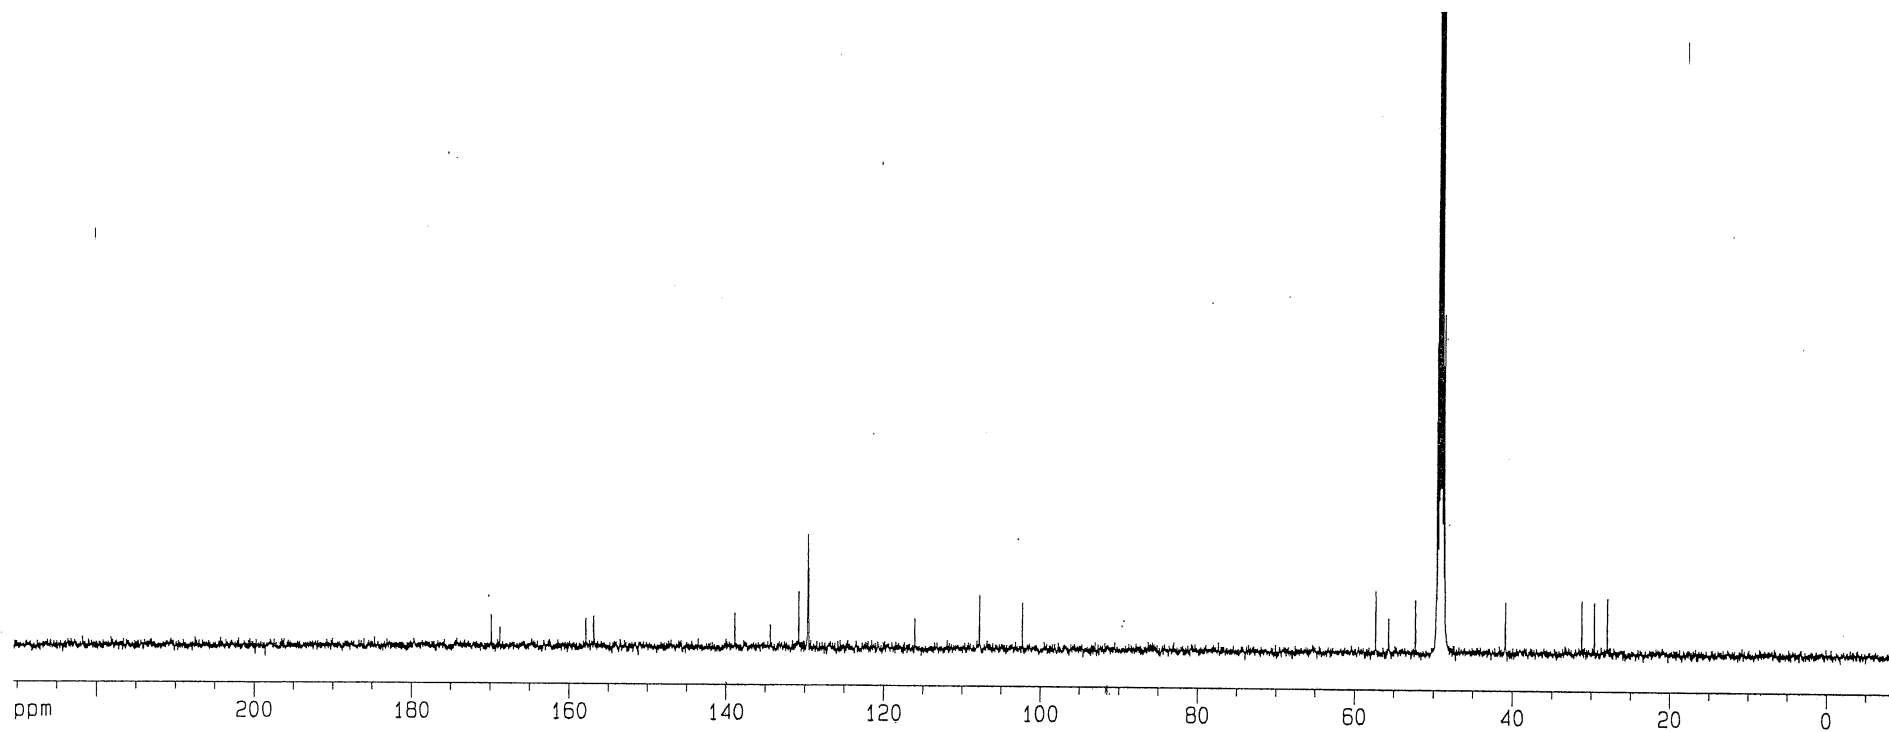

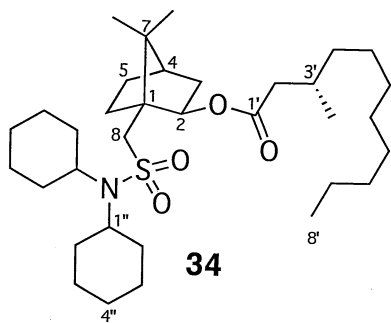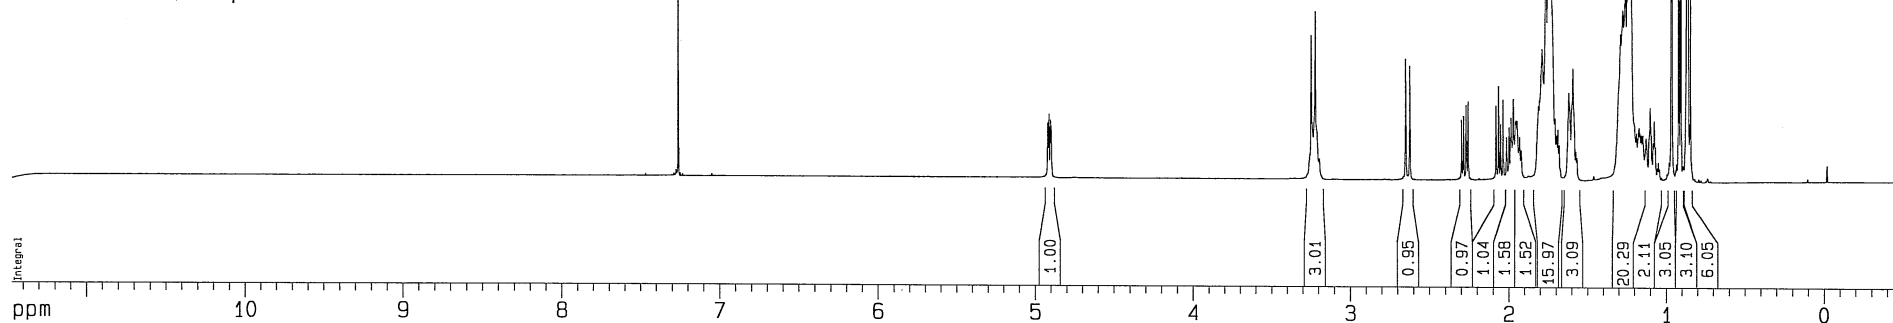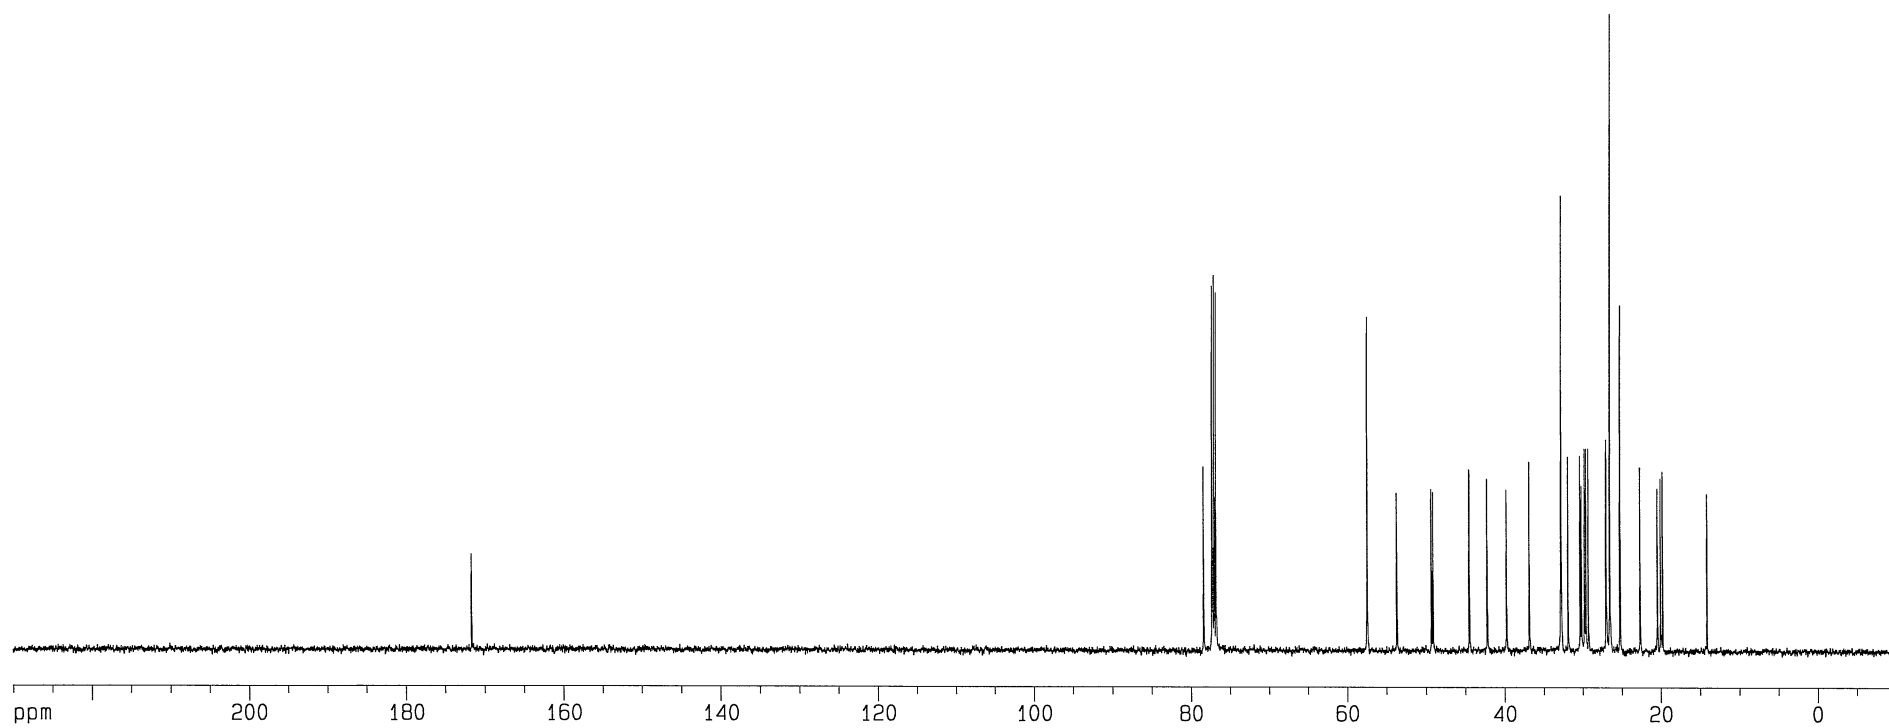

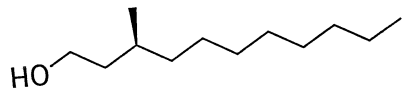

35

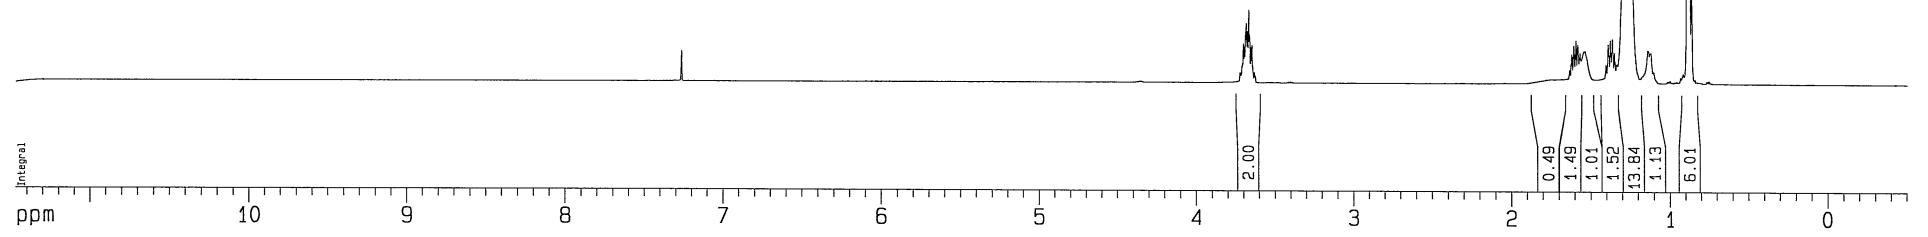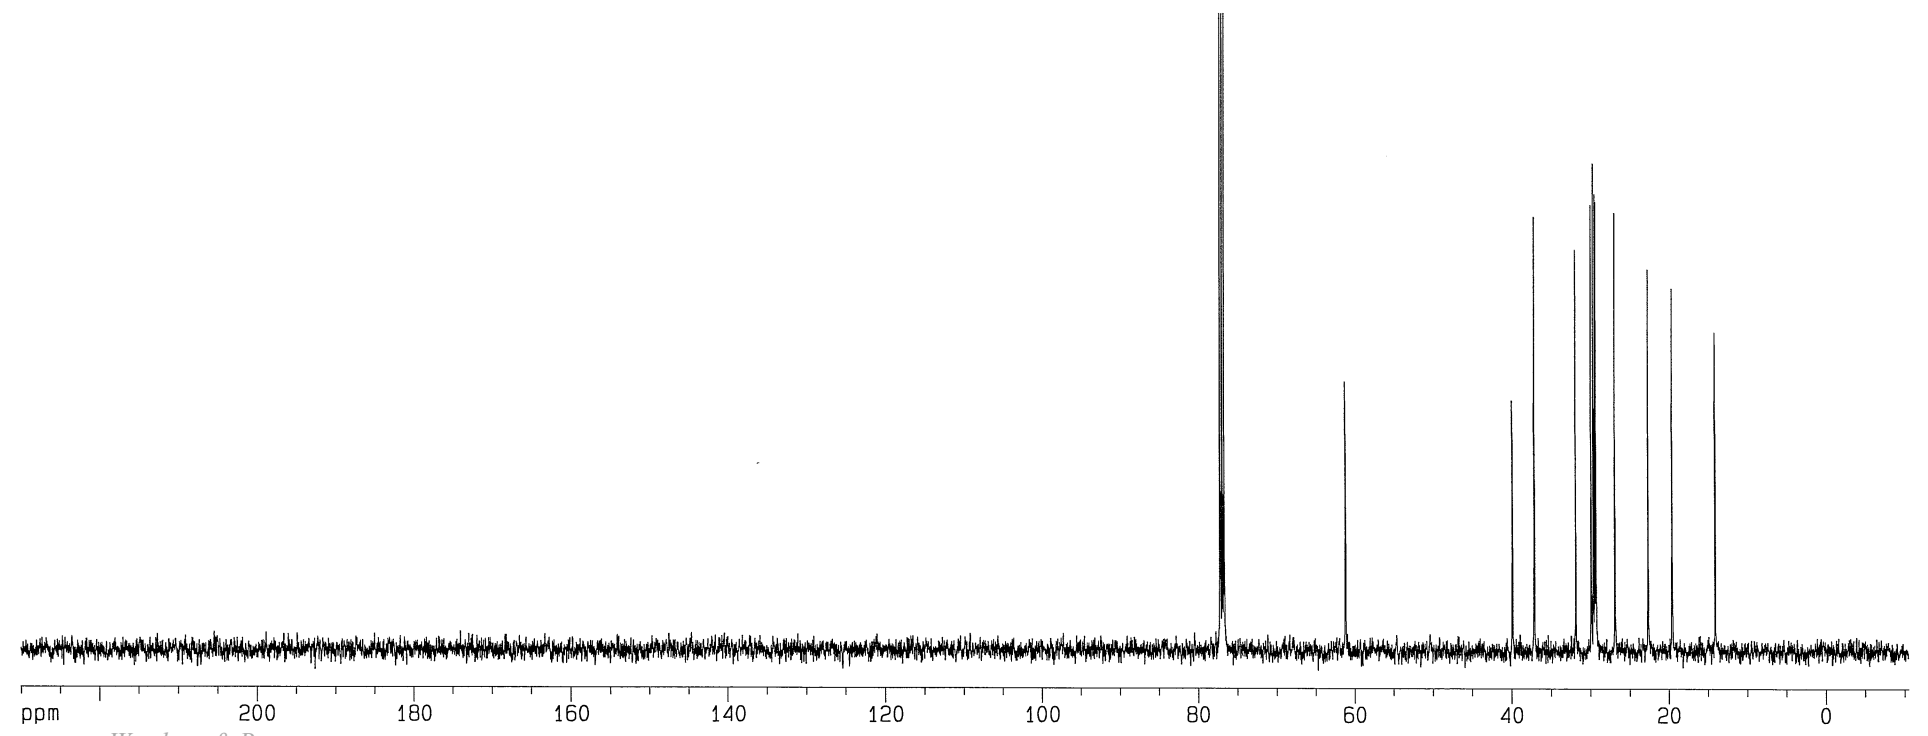

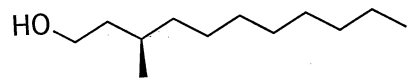

37

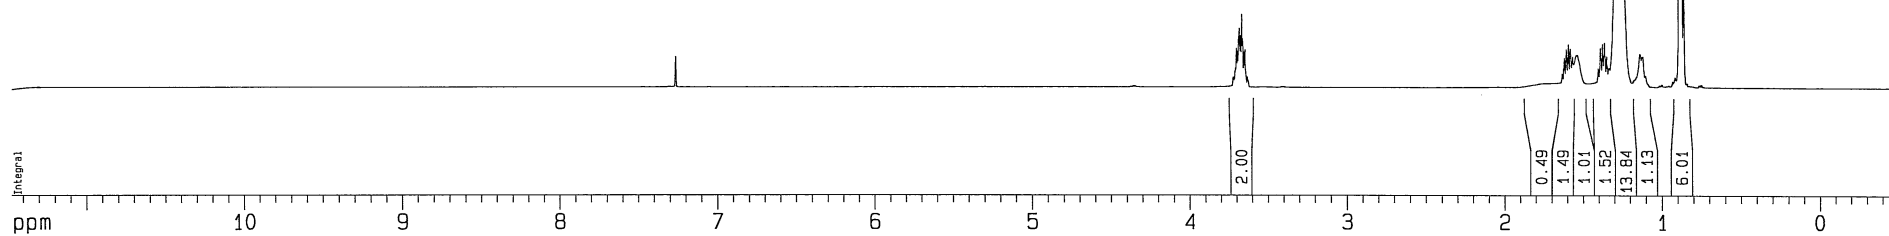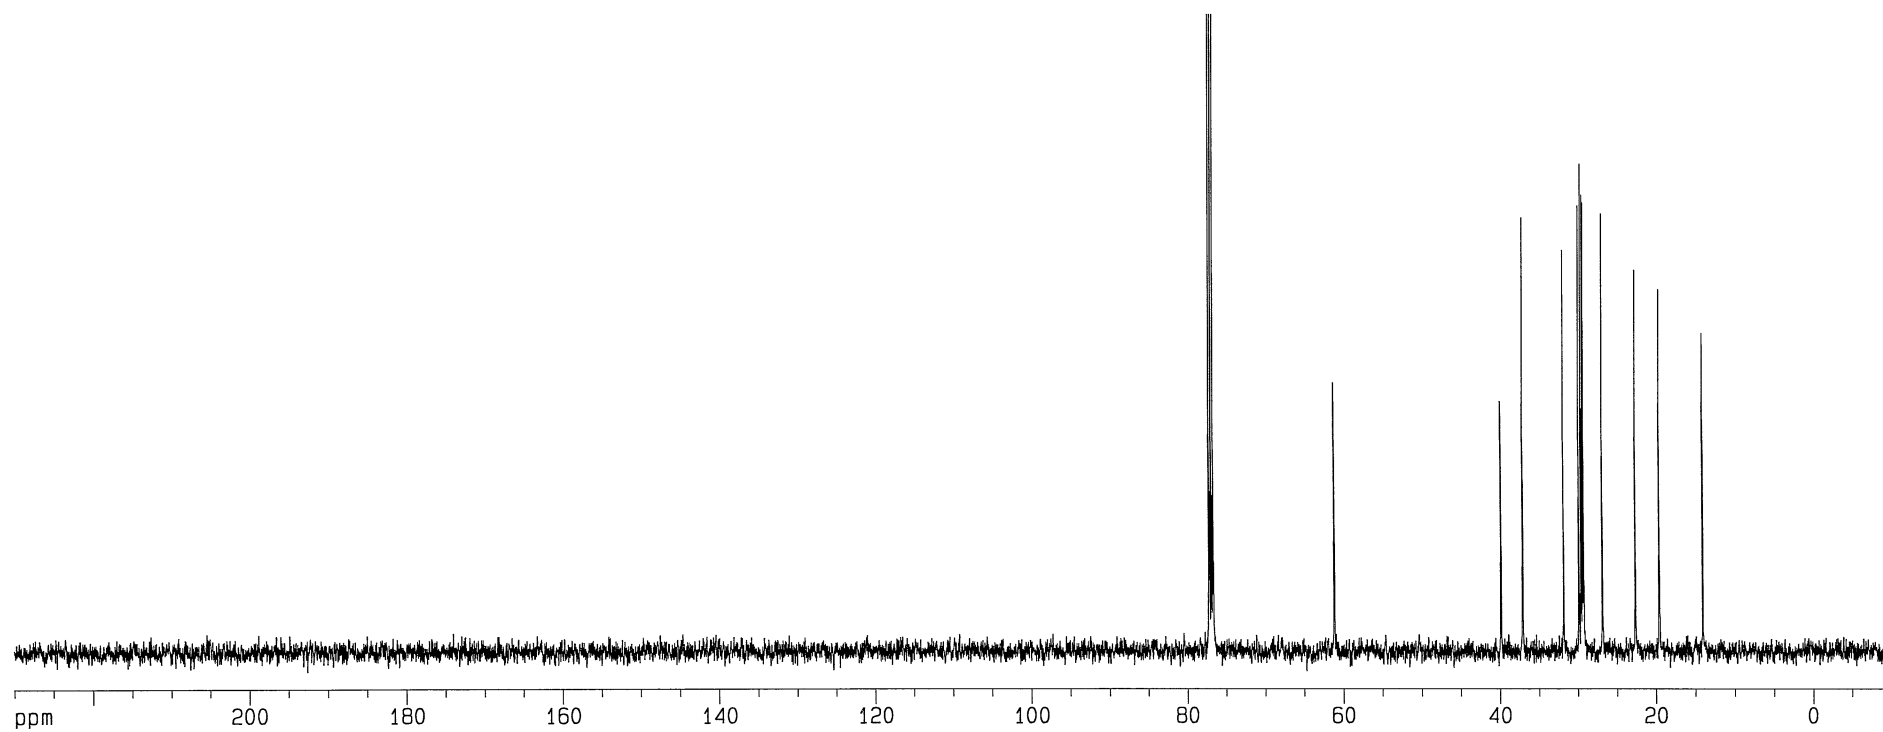



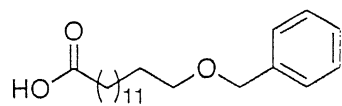

38

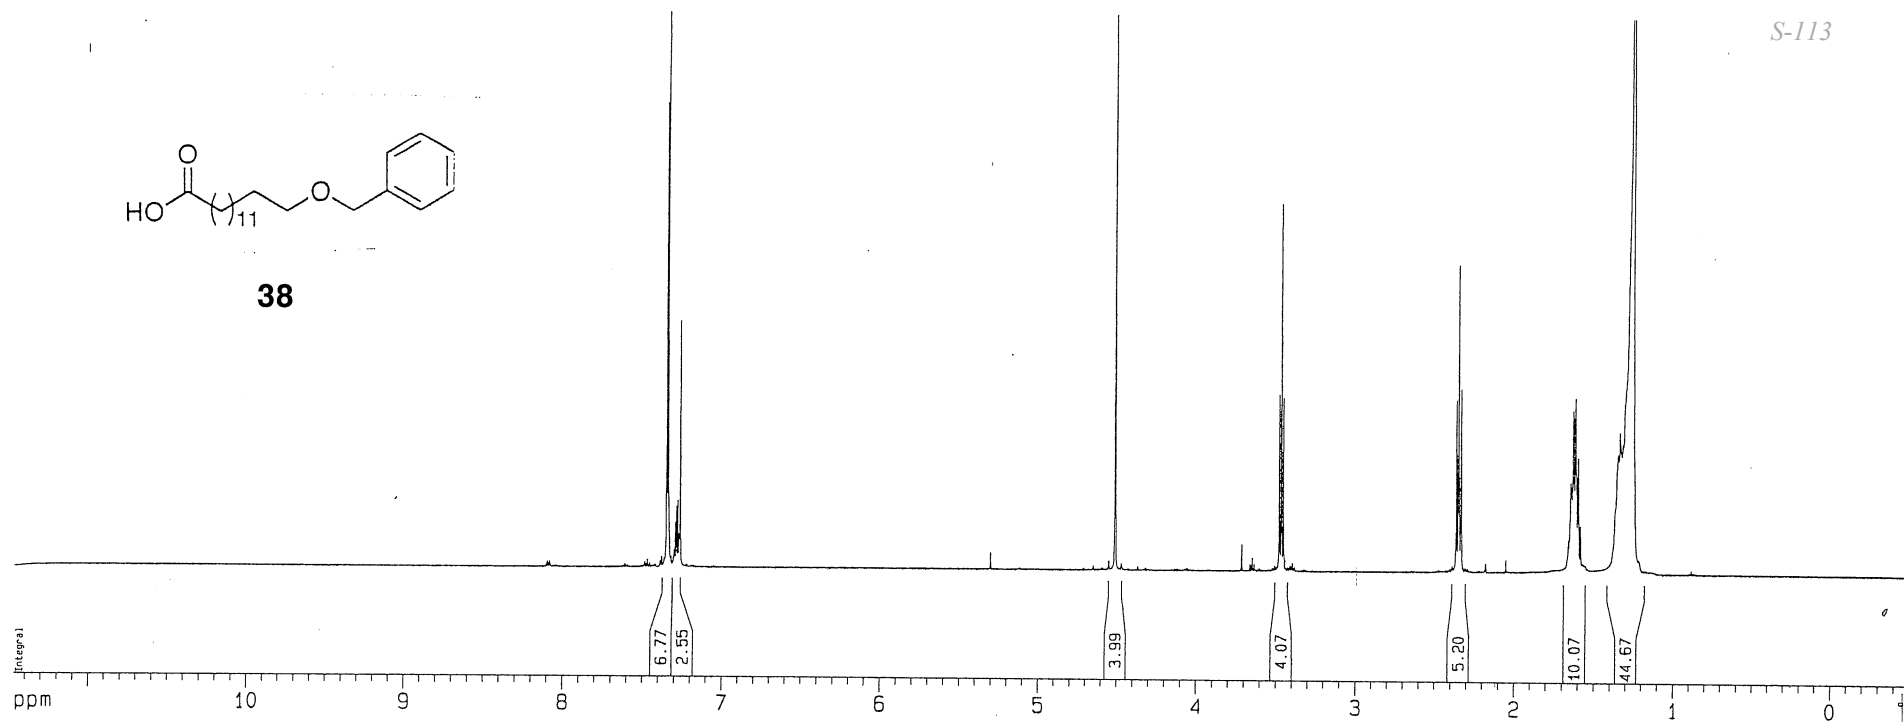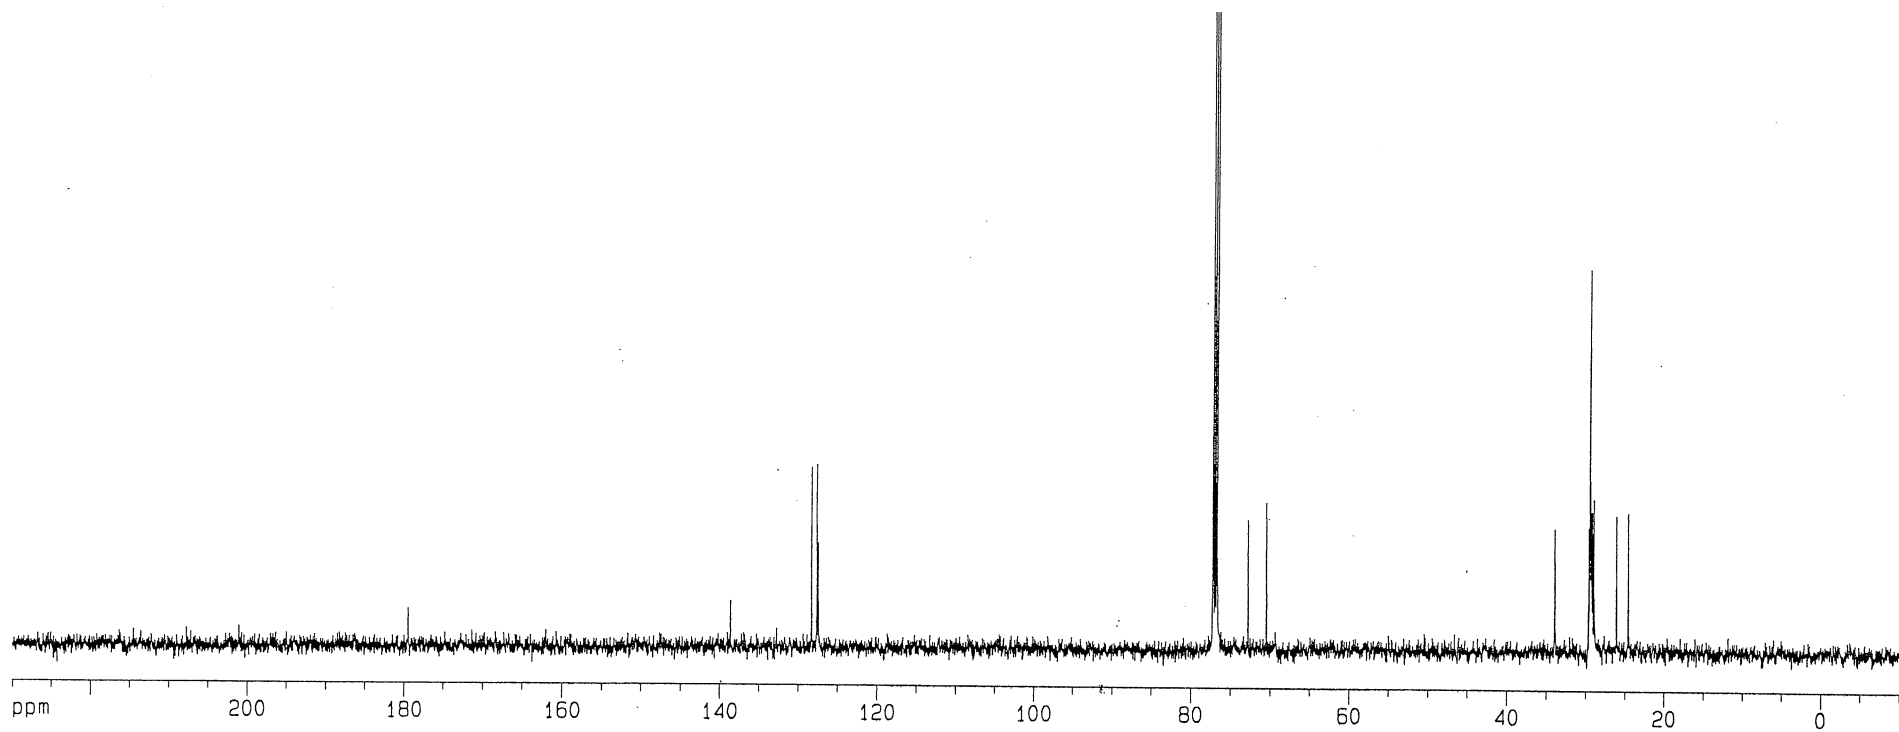

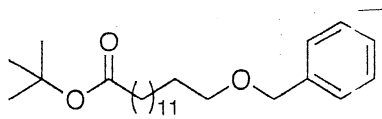

39

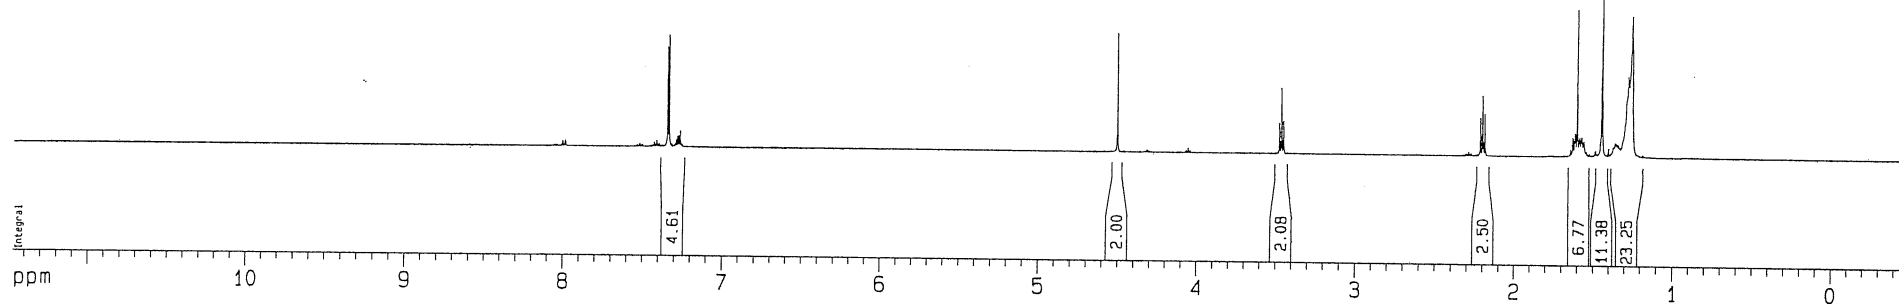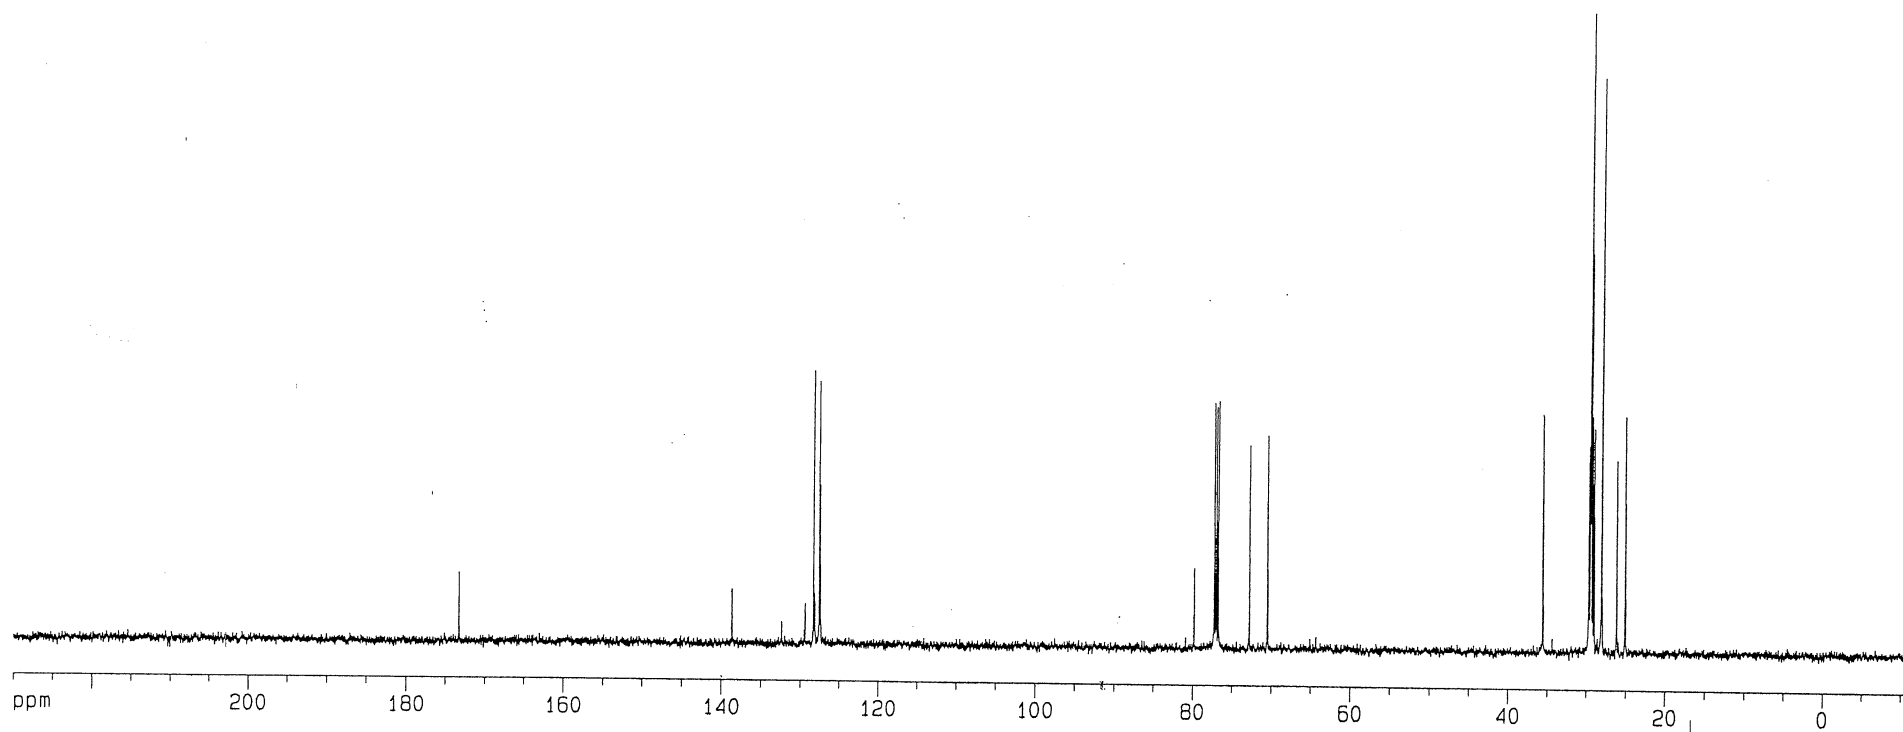

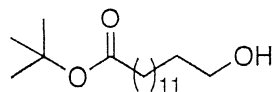**13**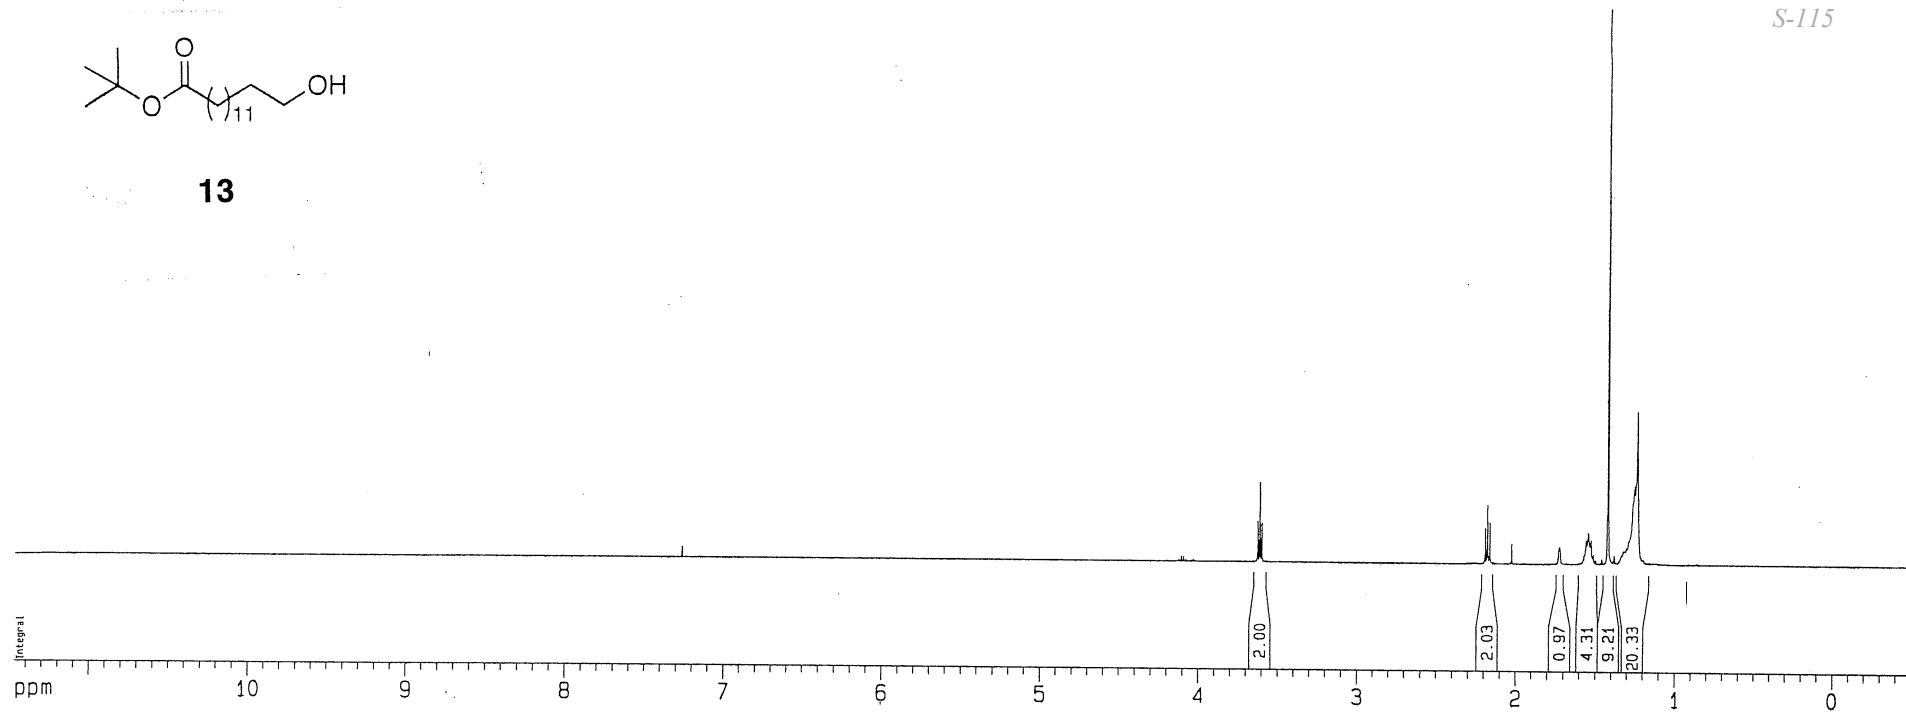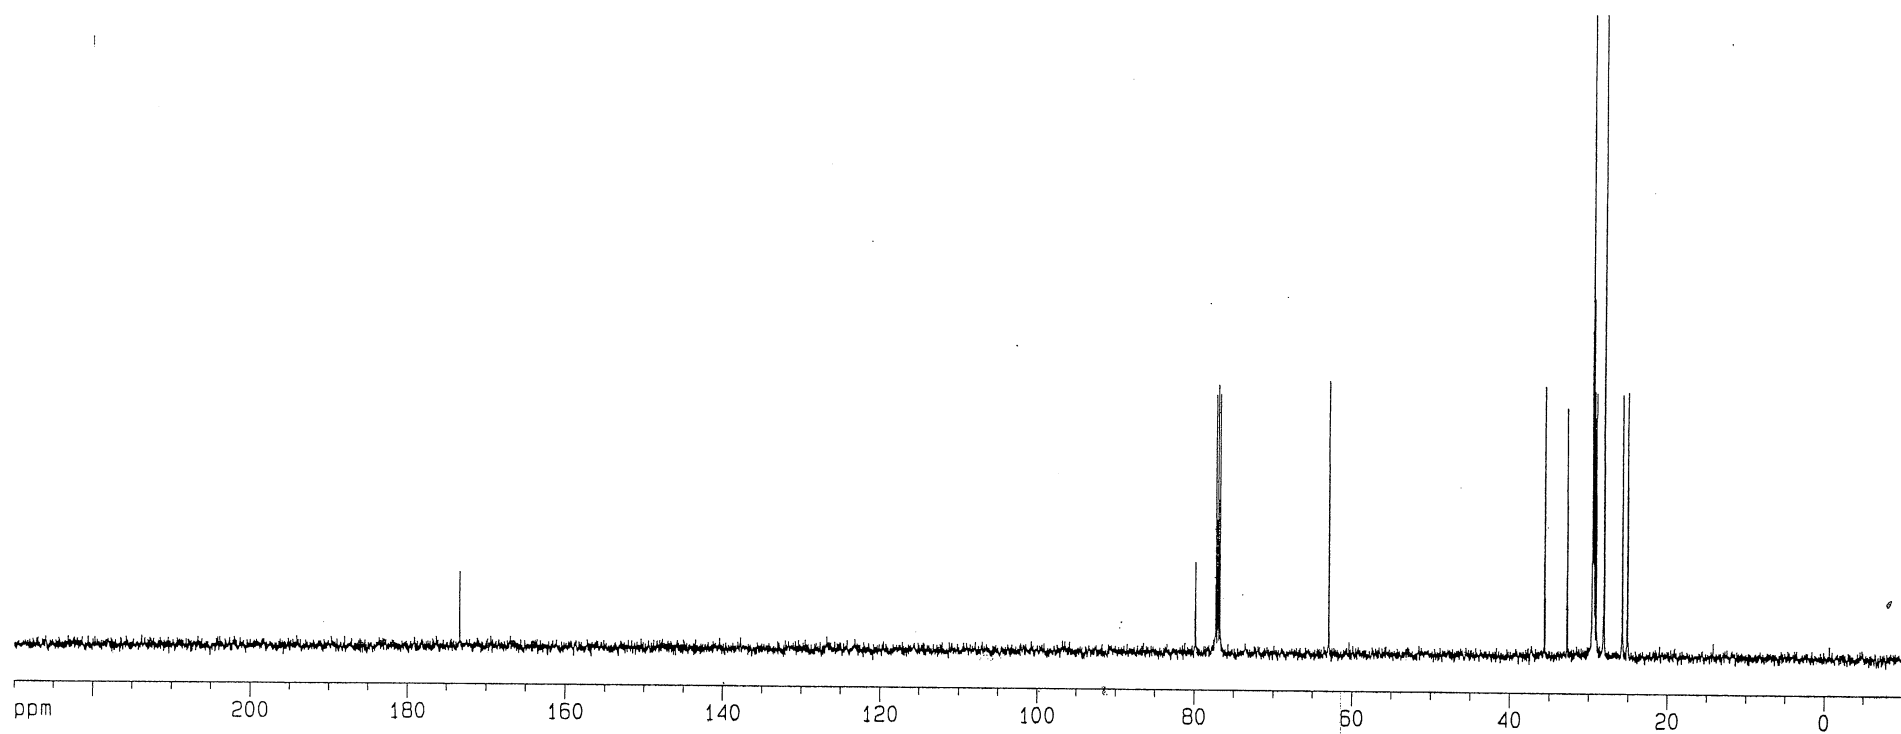

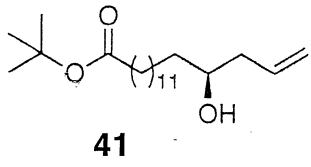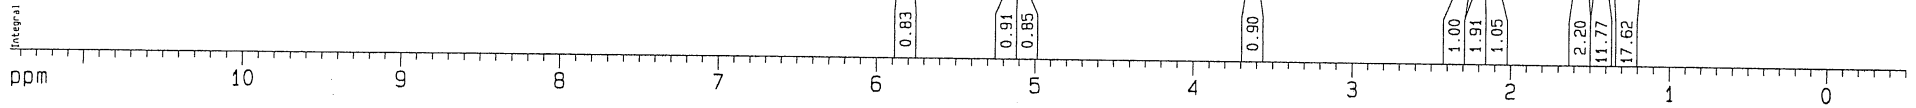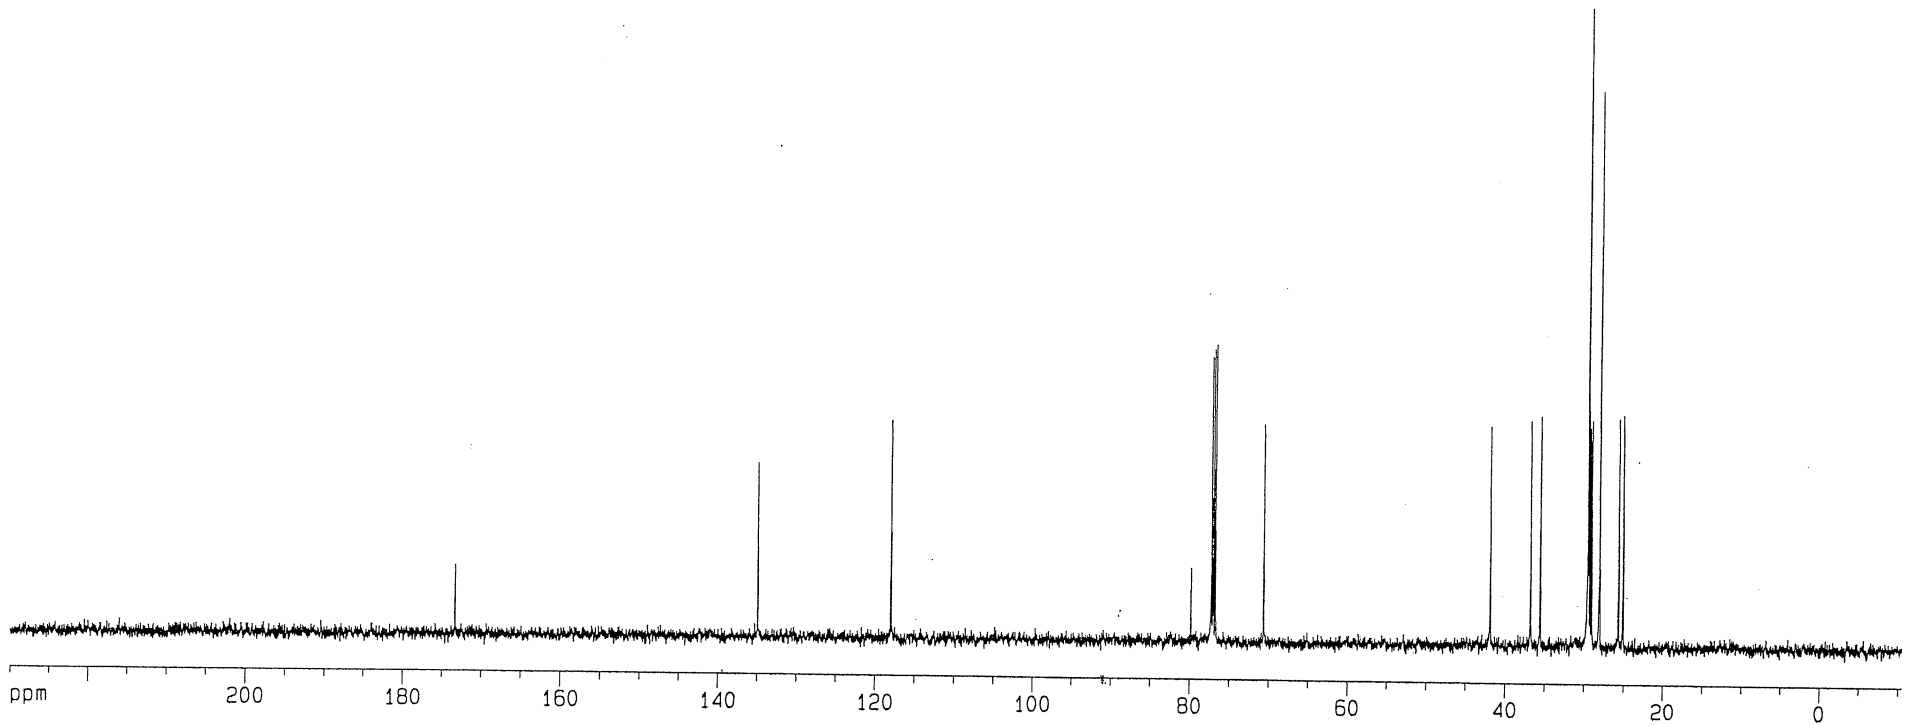

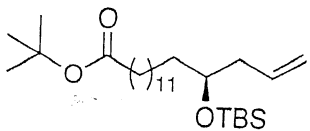

S-117

14

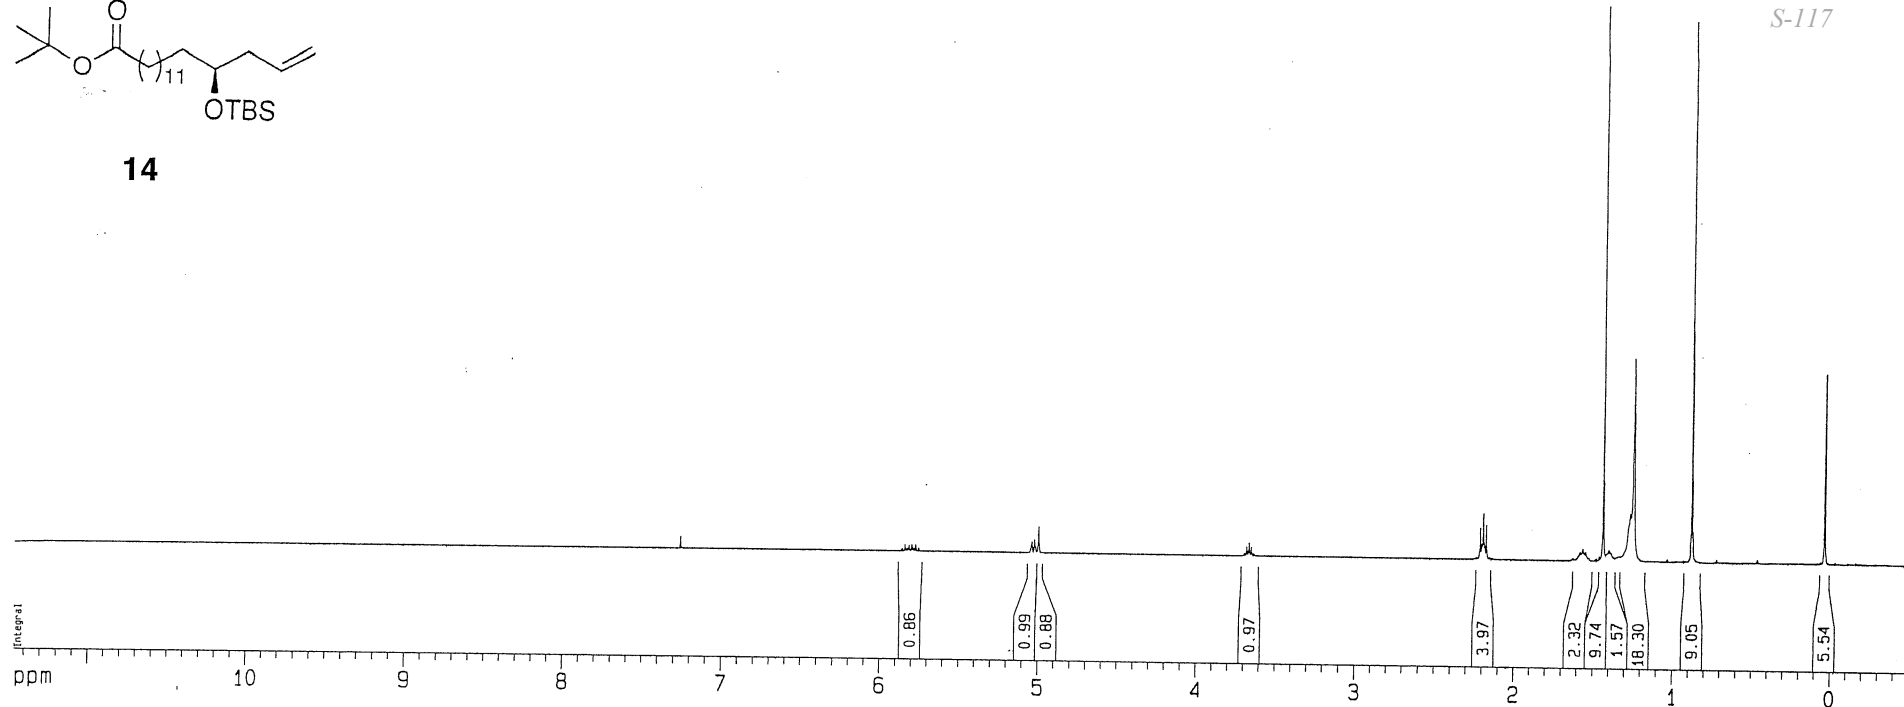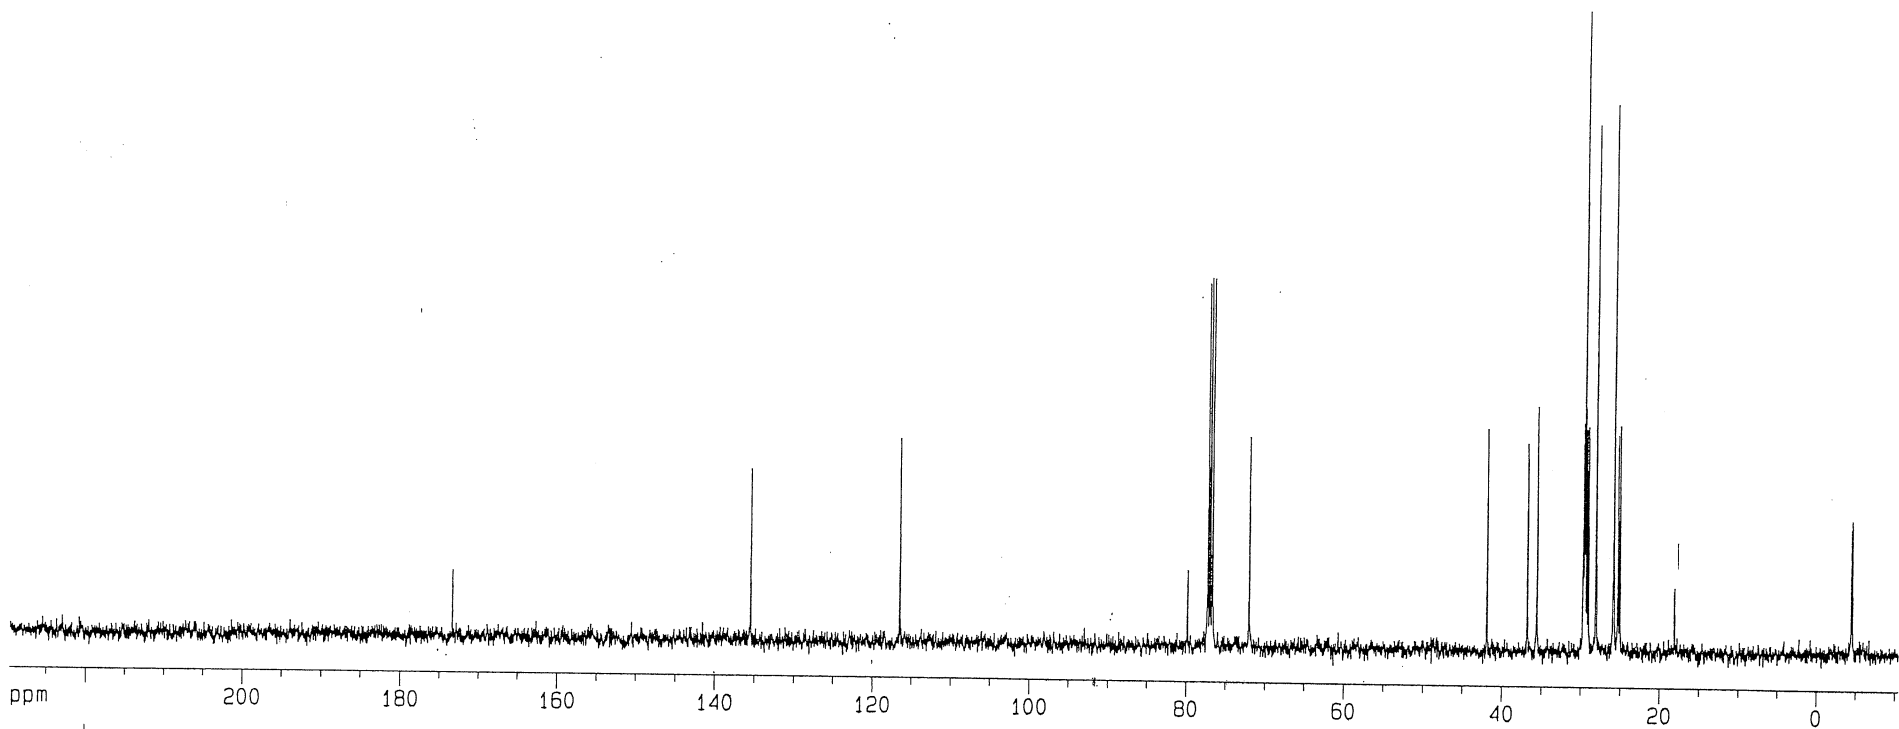

Wardrop & Bowen

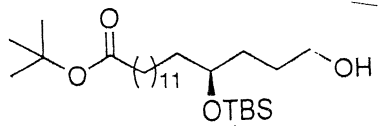

42

S-118

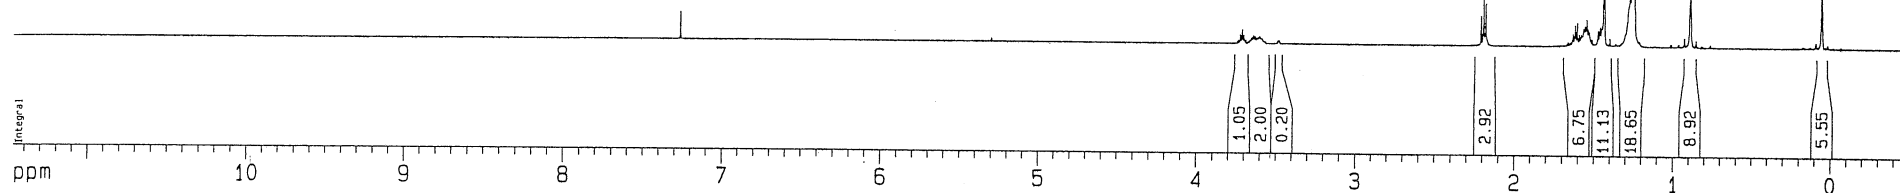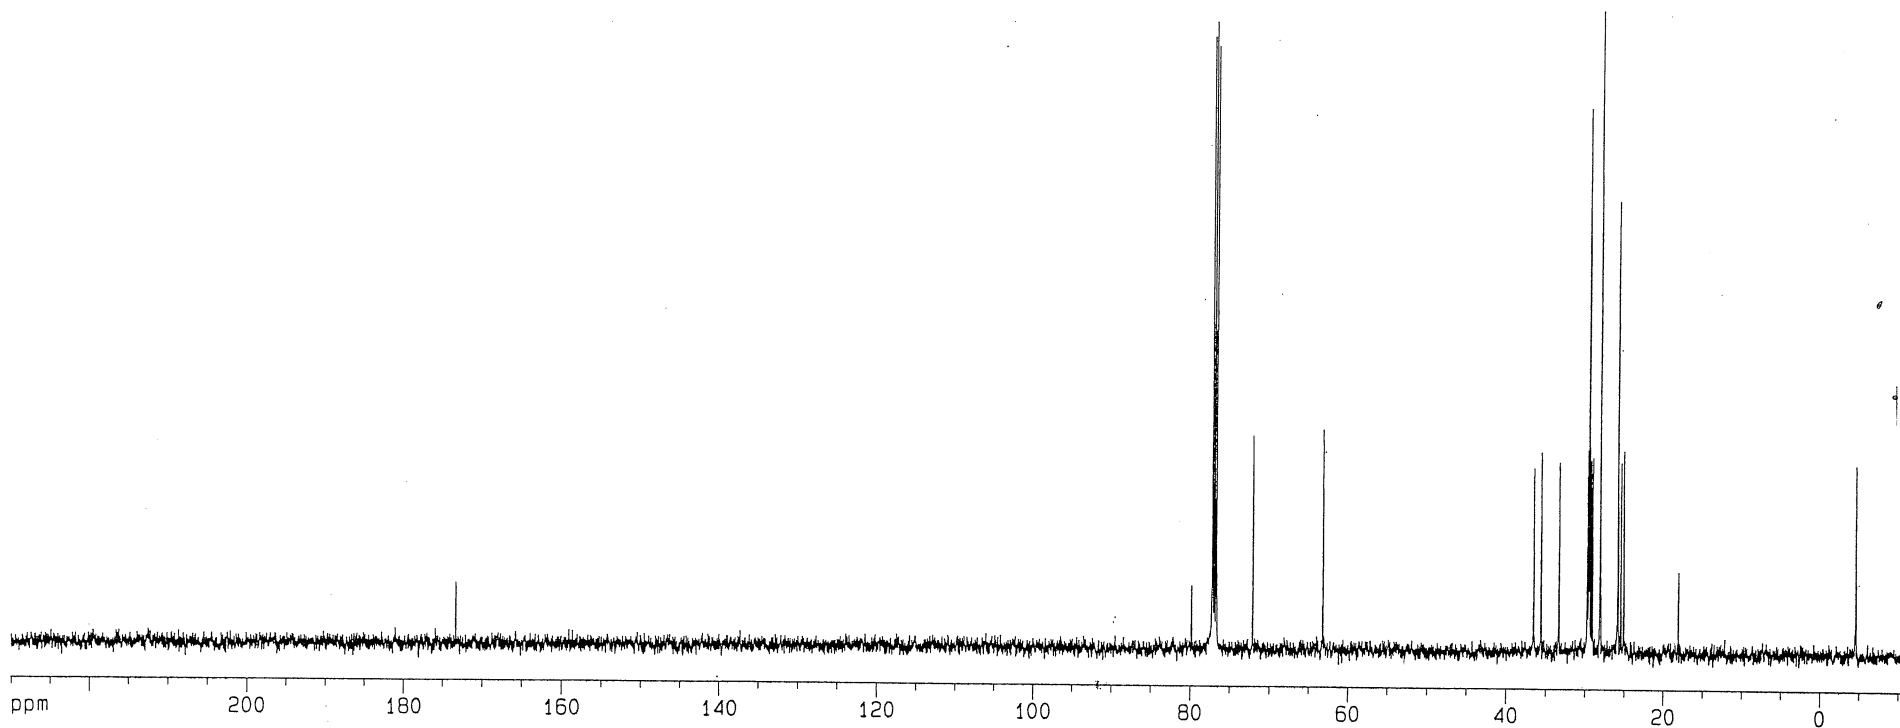

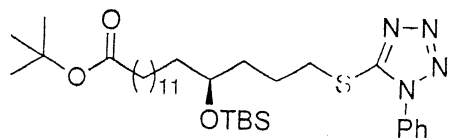

43

S-119

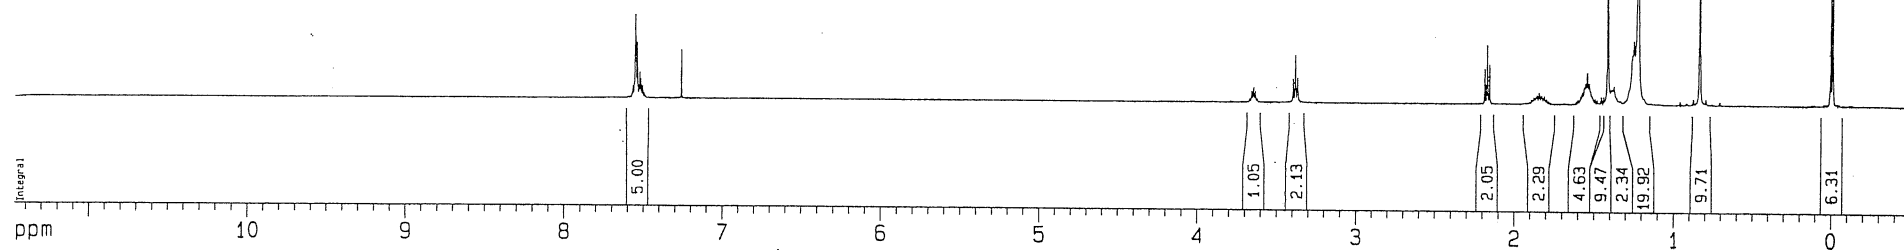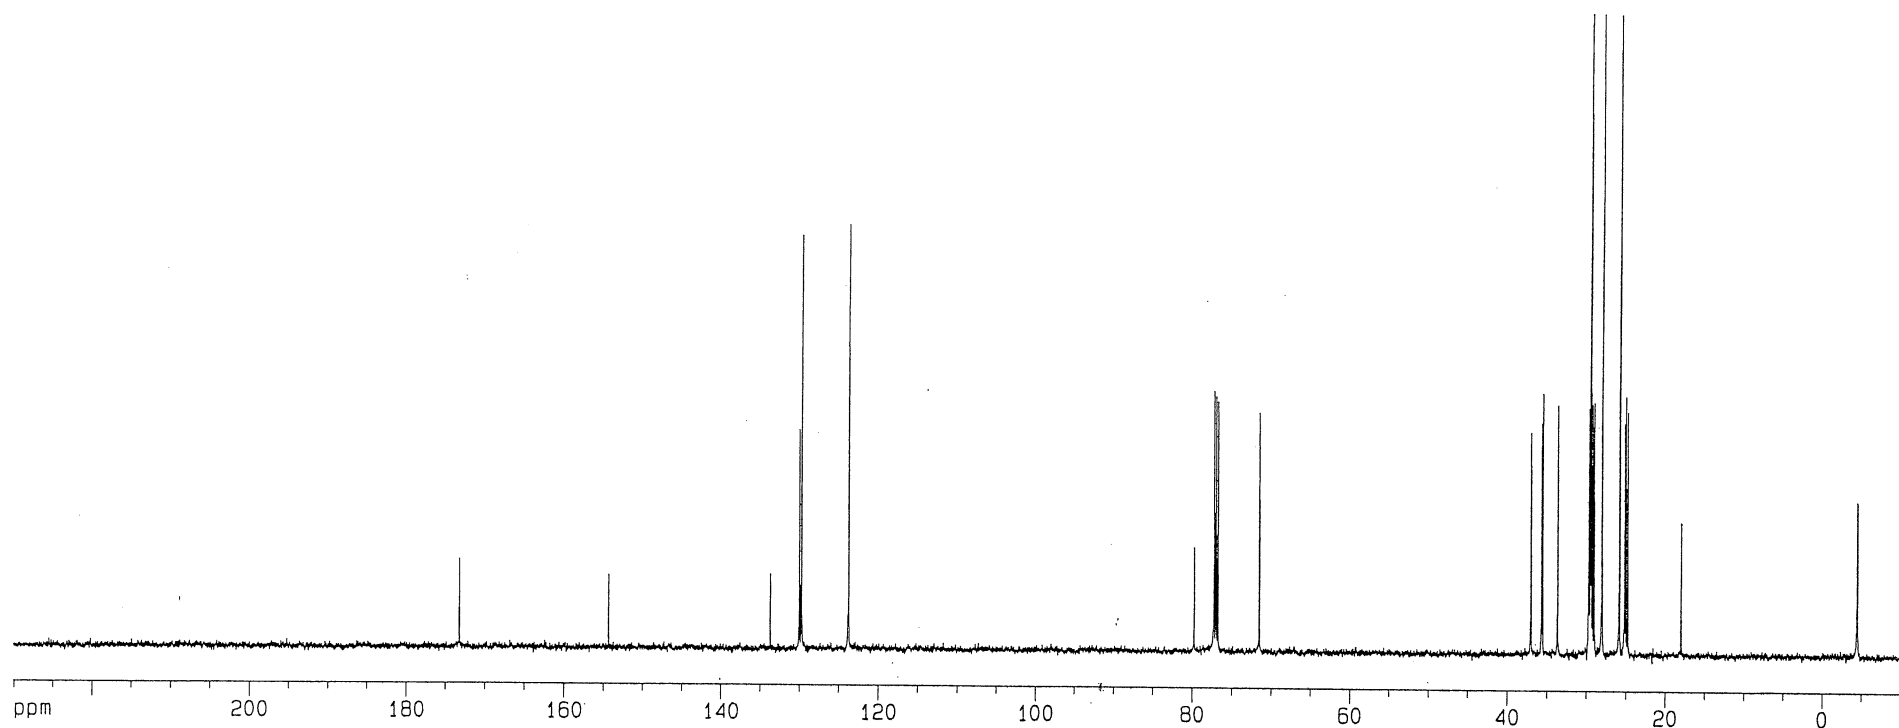

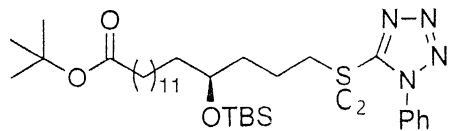

15

S-120

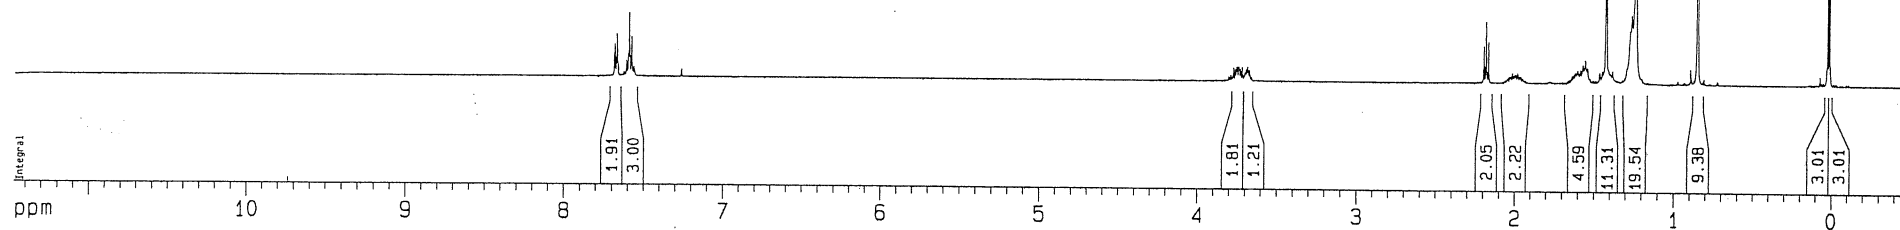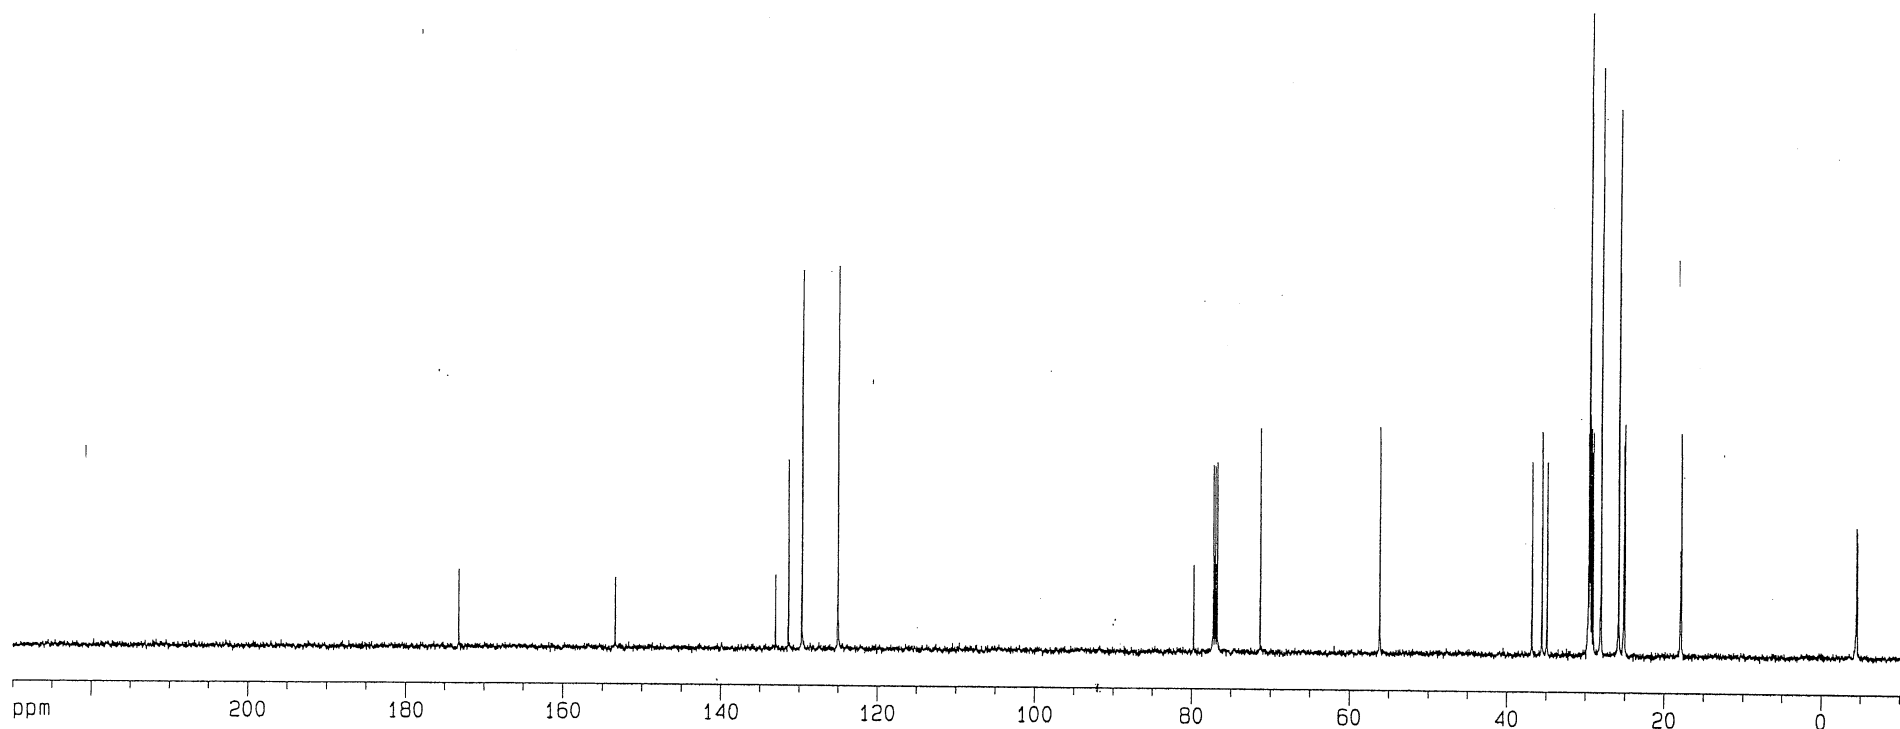



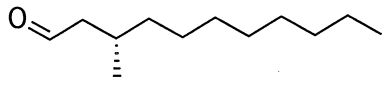

44

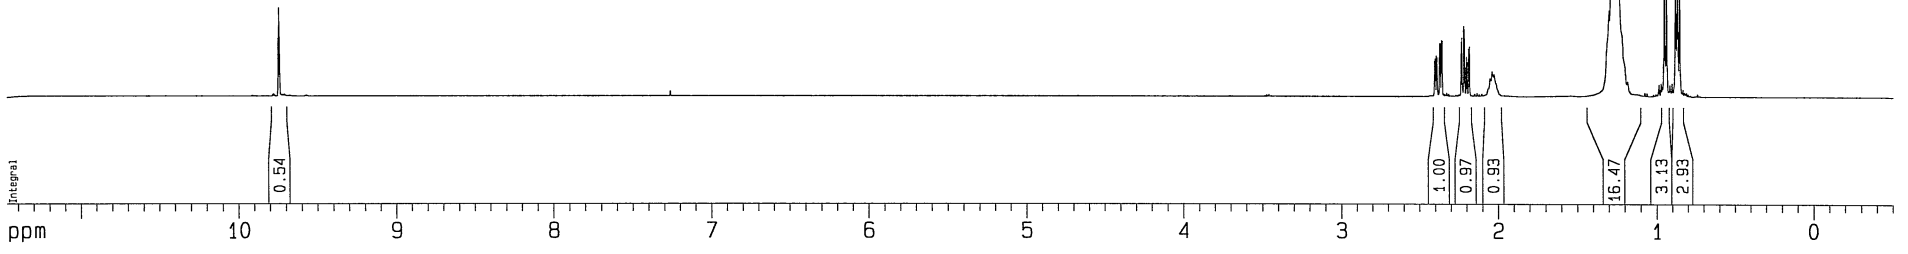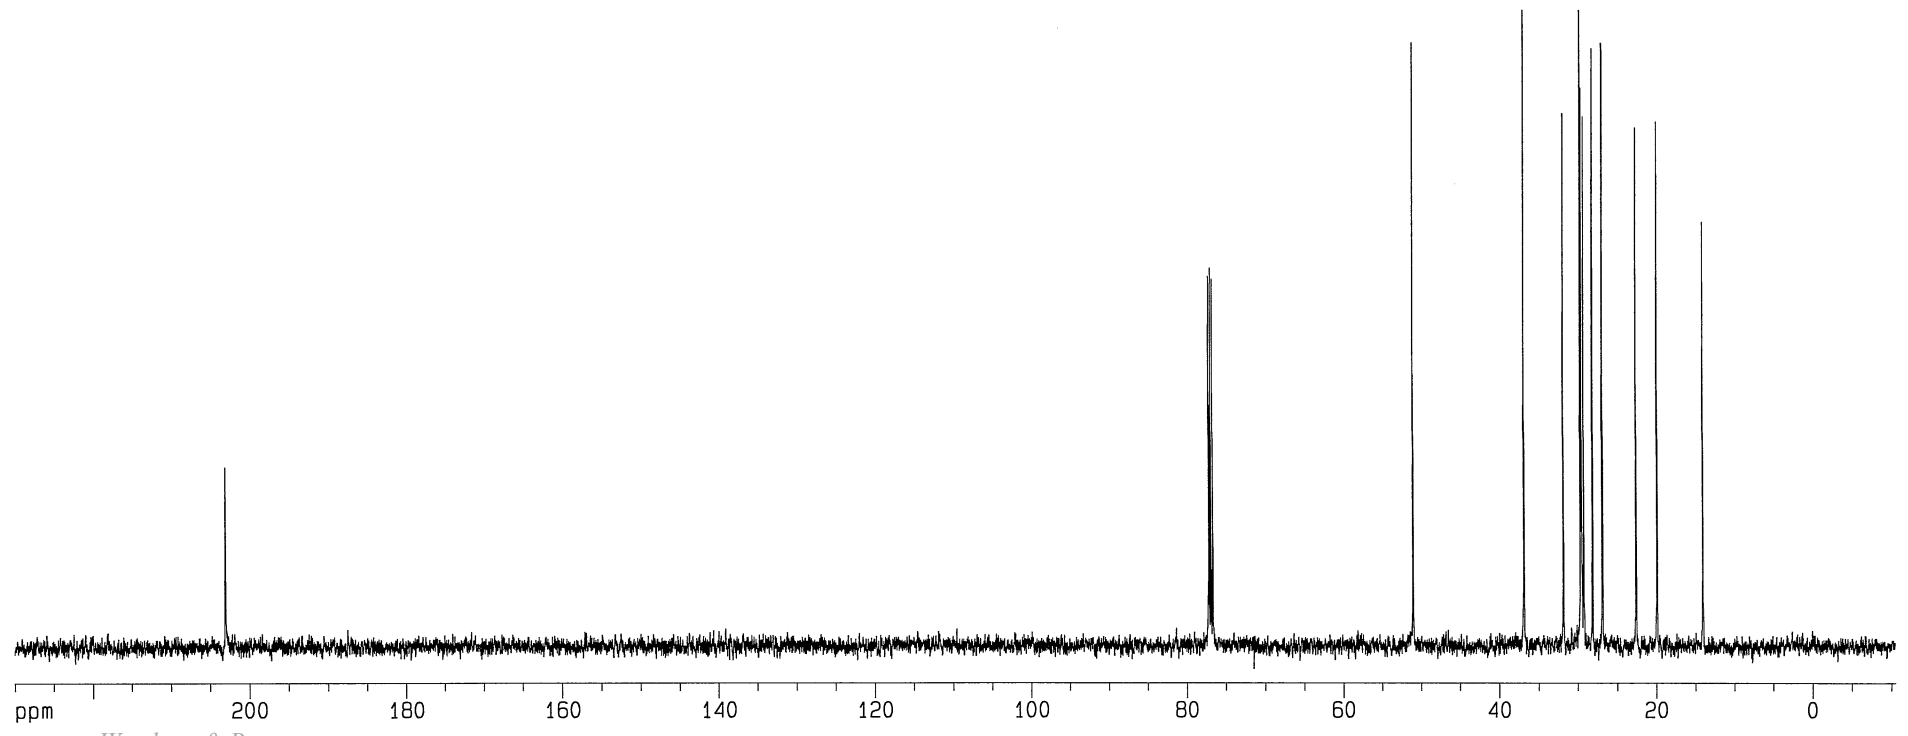

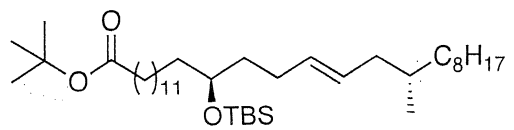

16

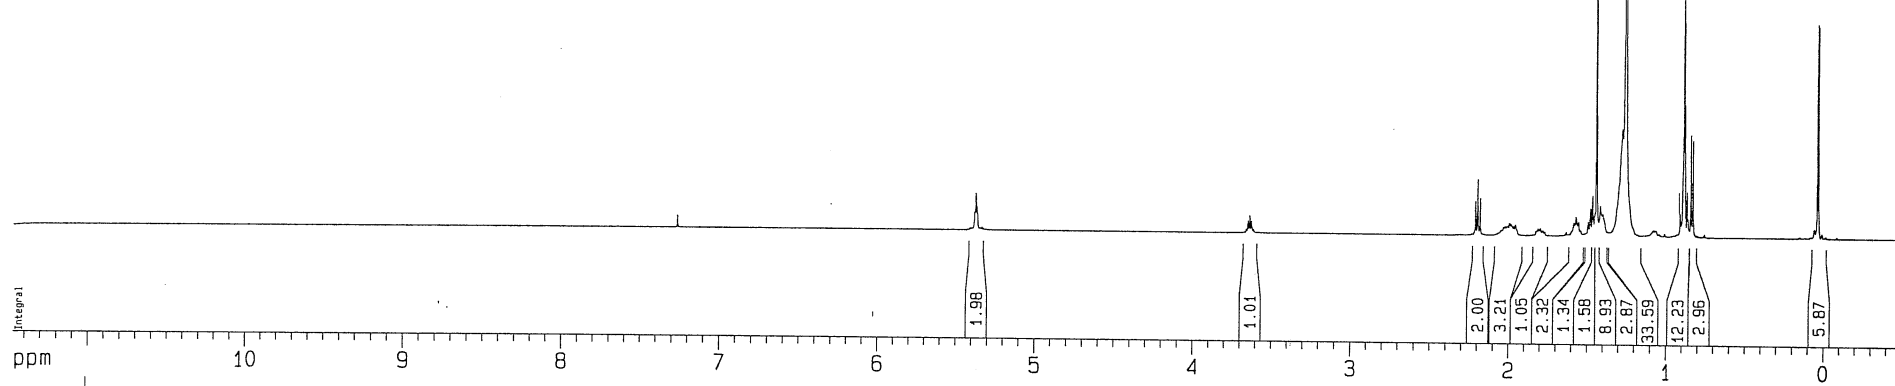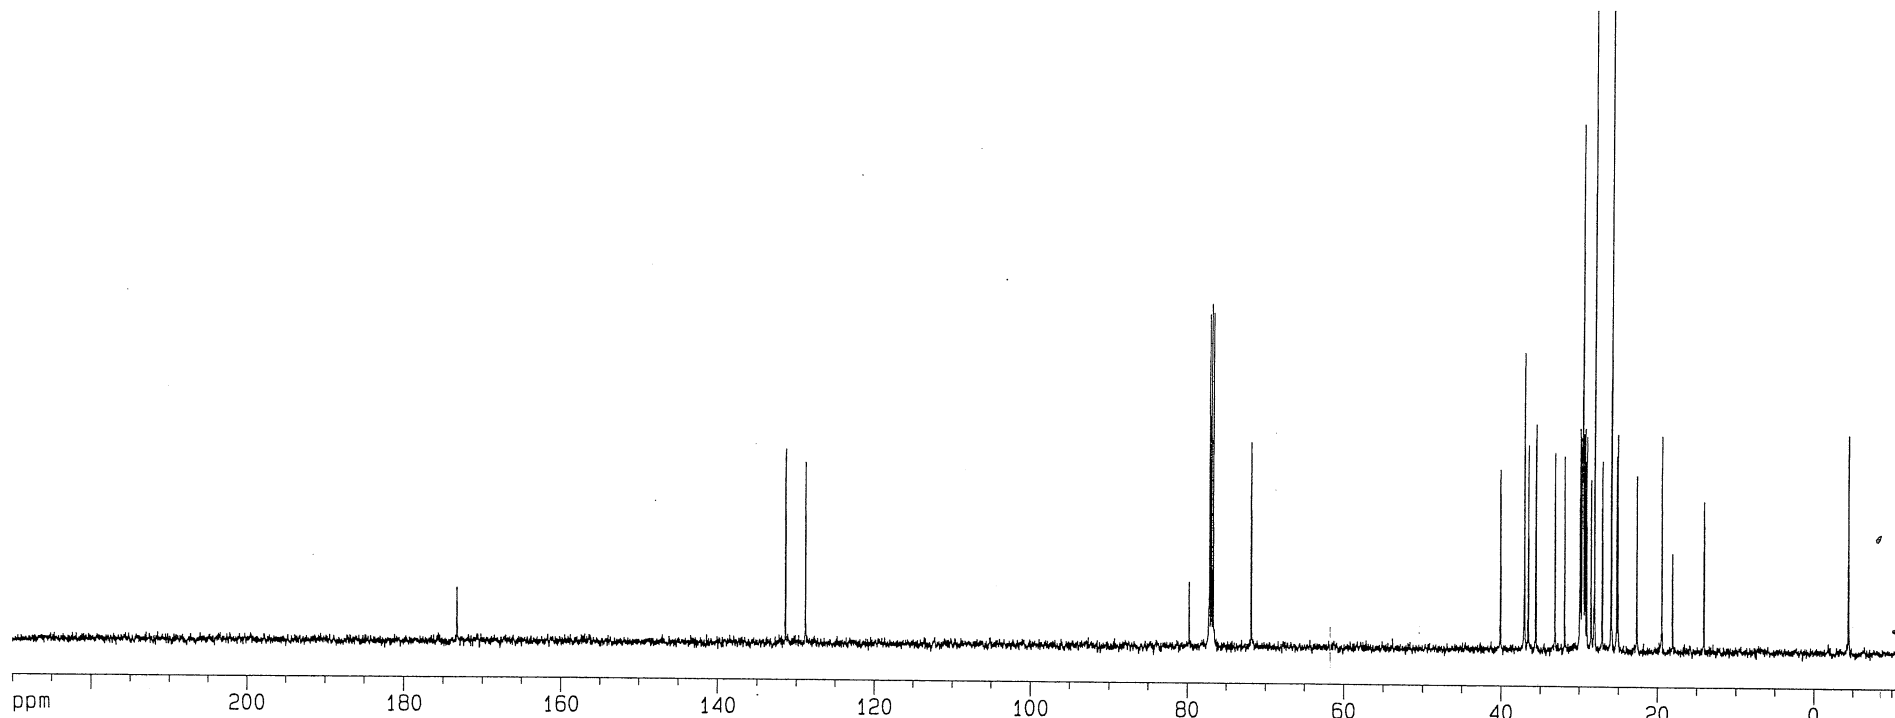

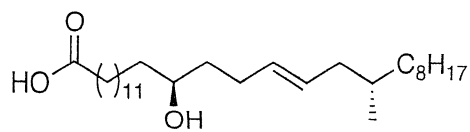

17

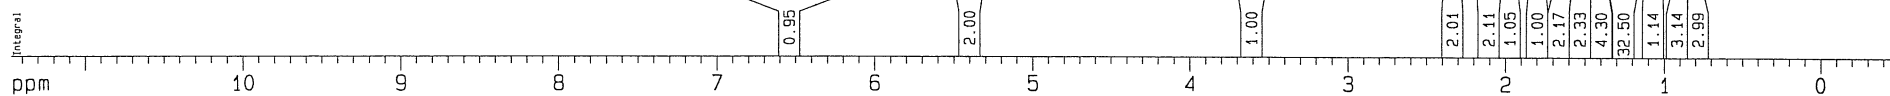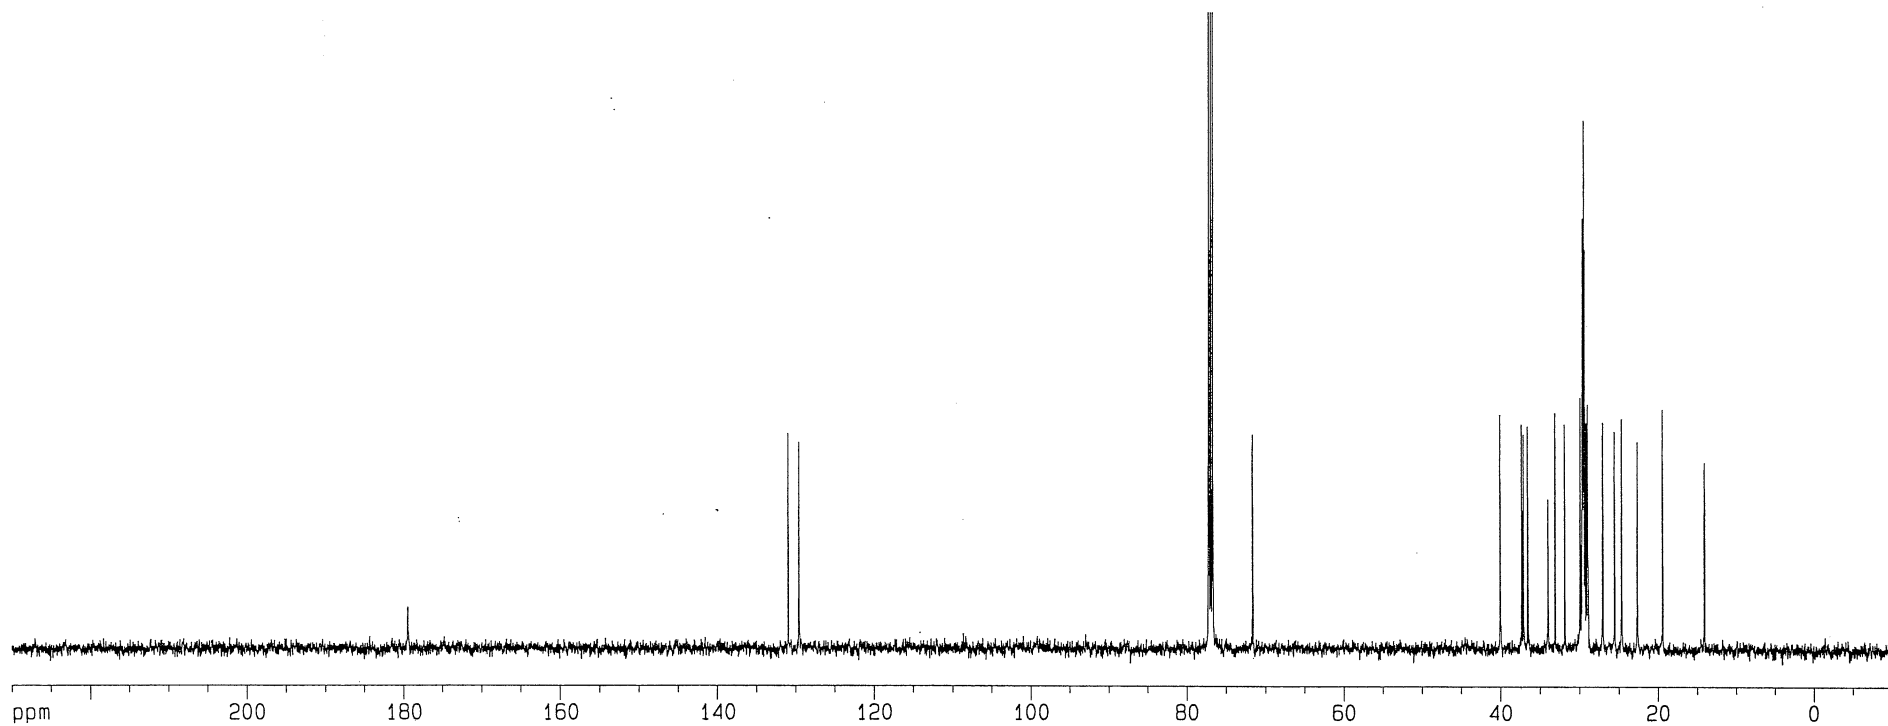

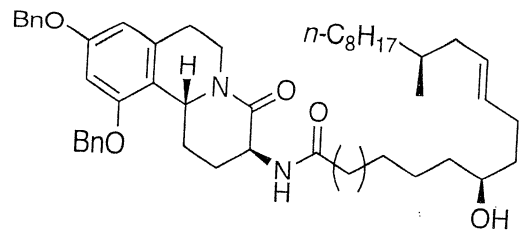**18**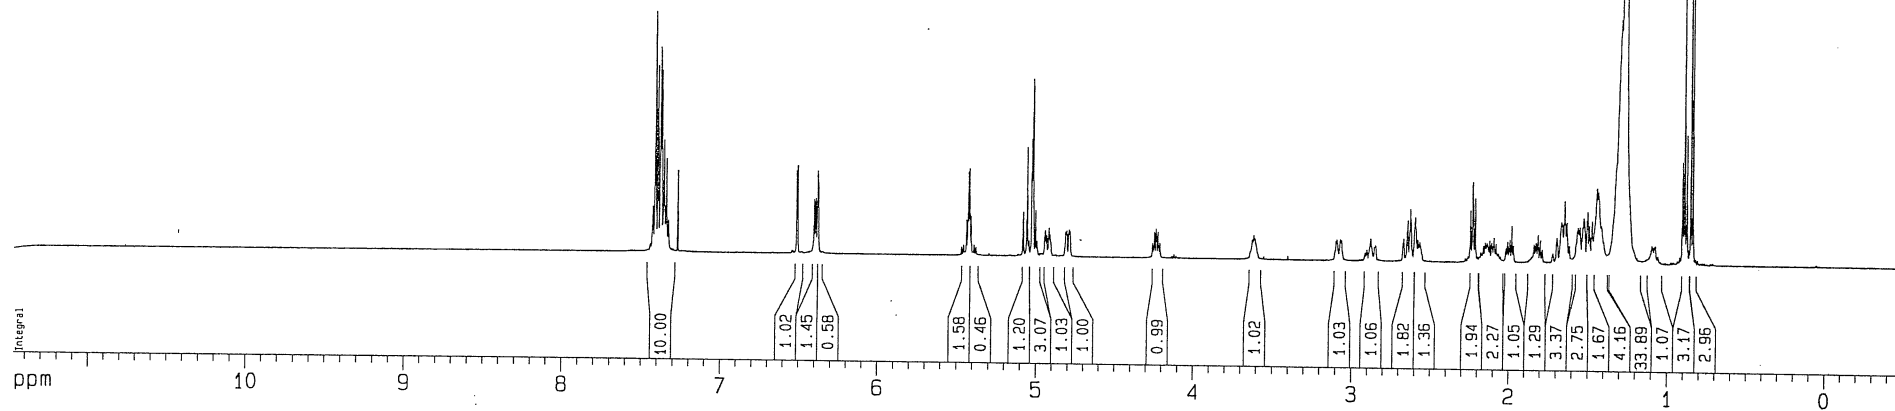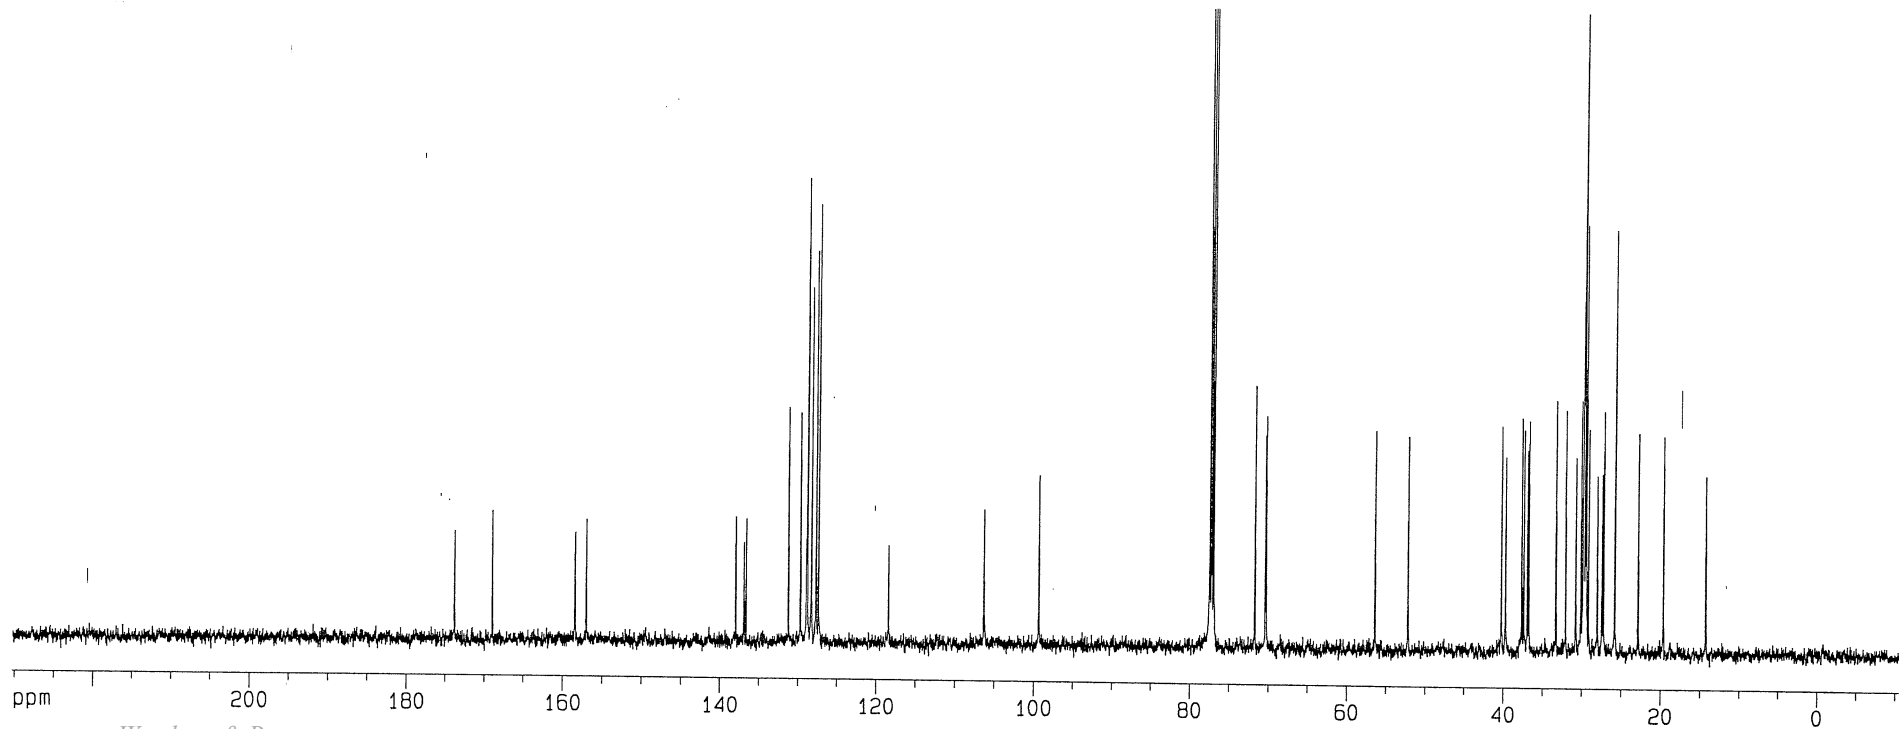

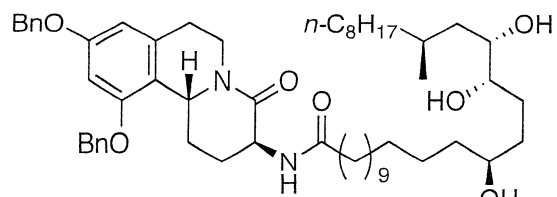**19**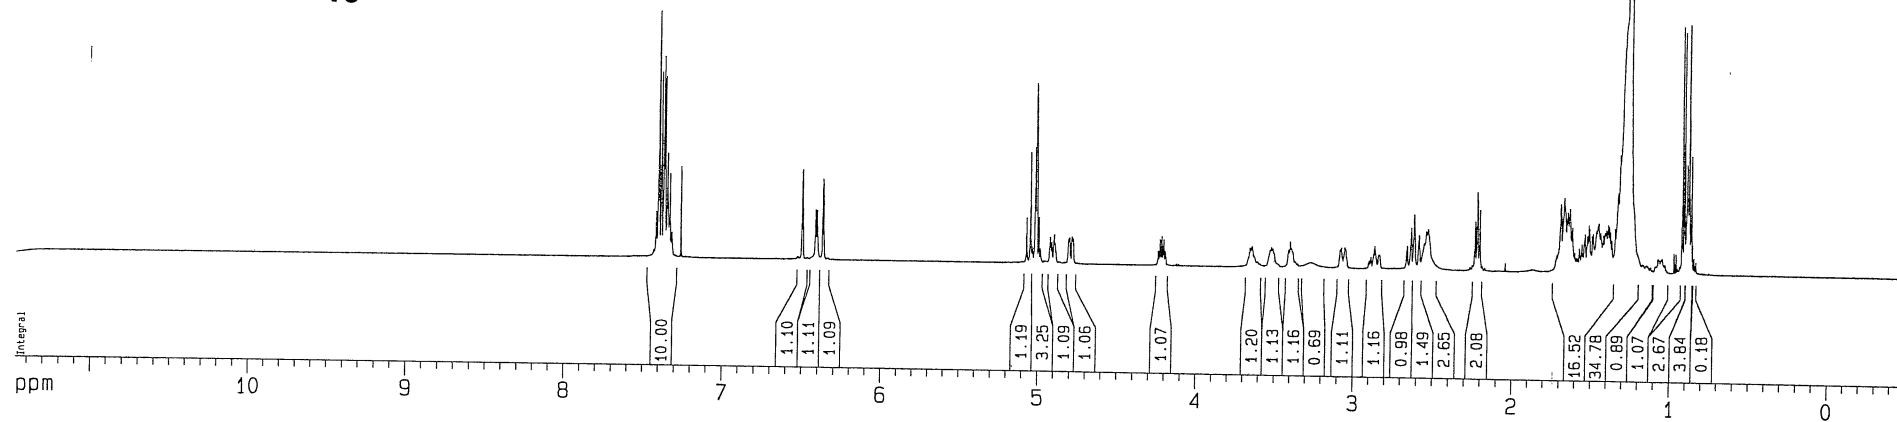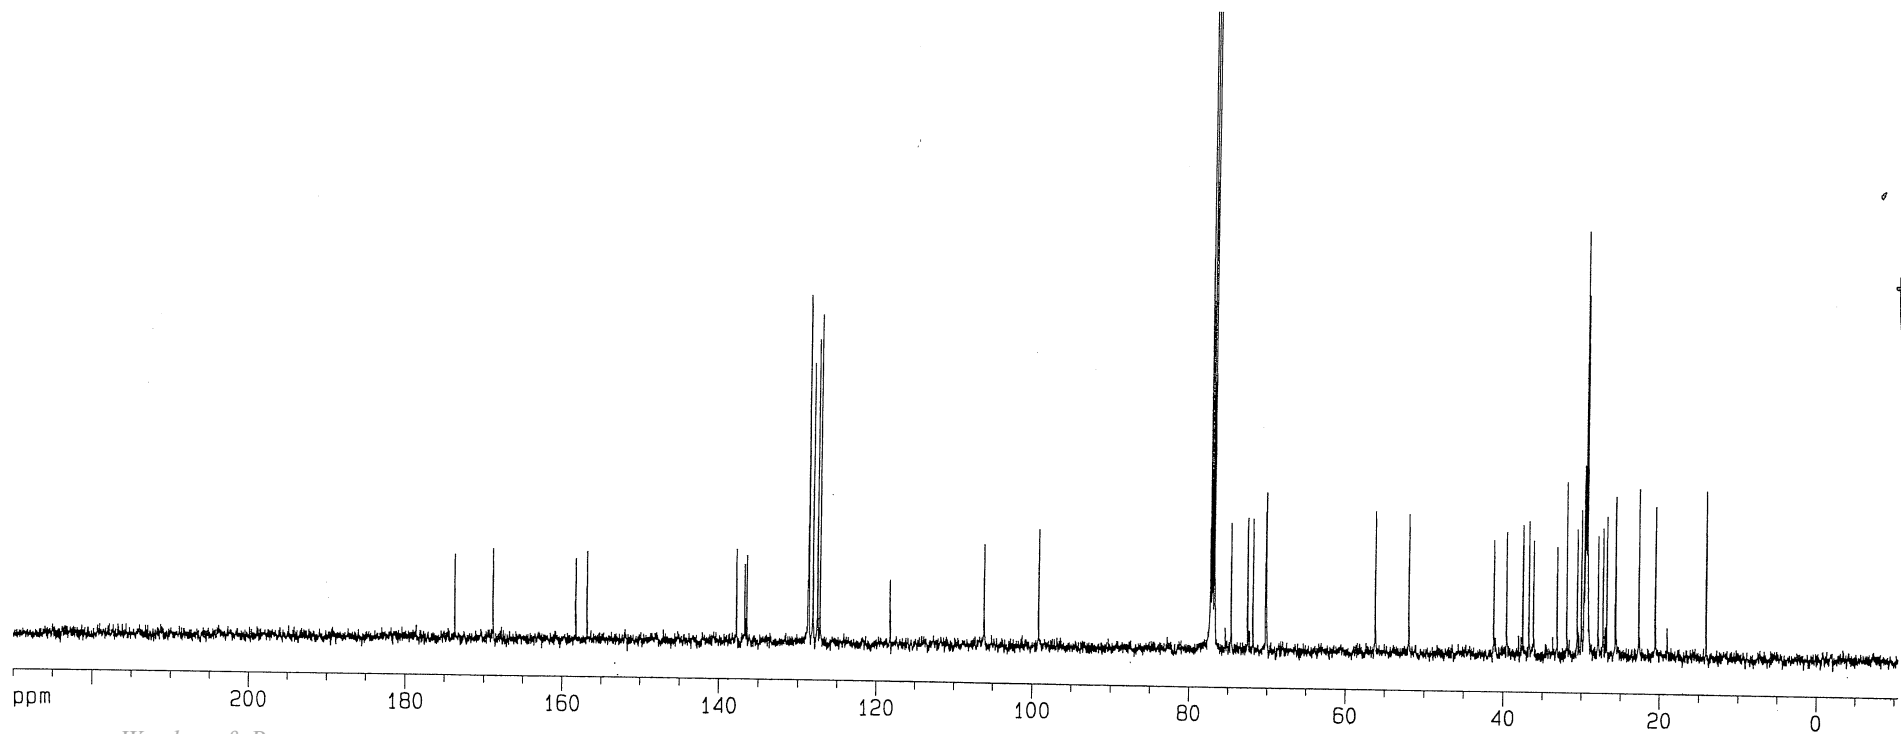

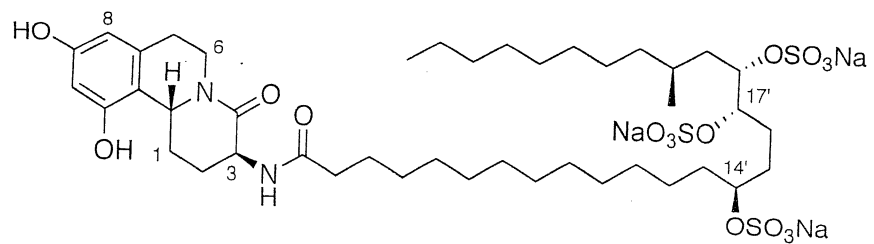**4**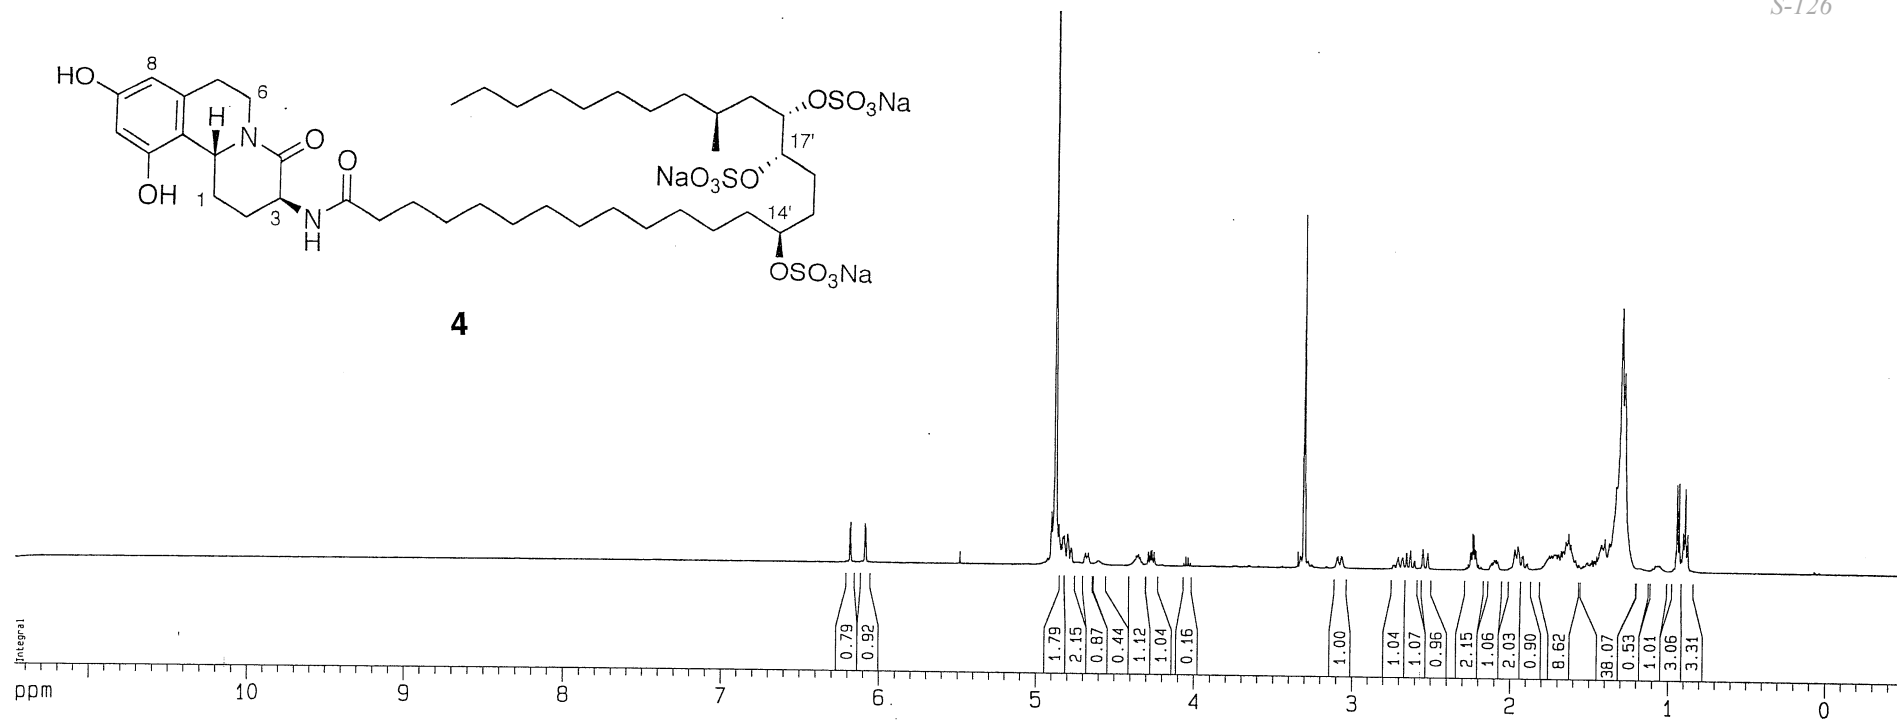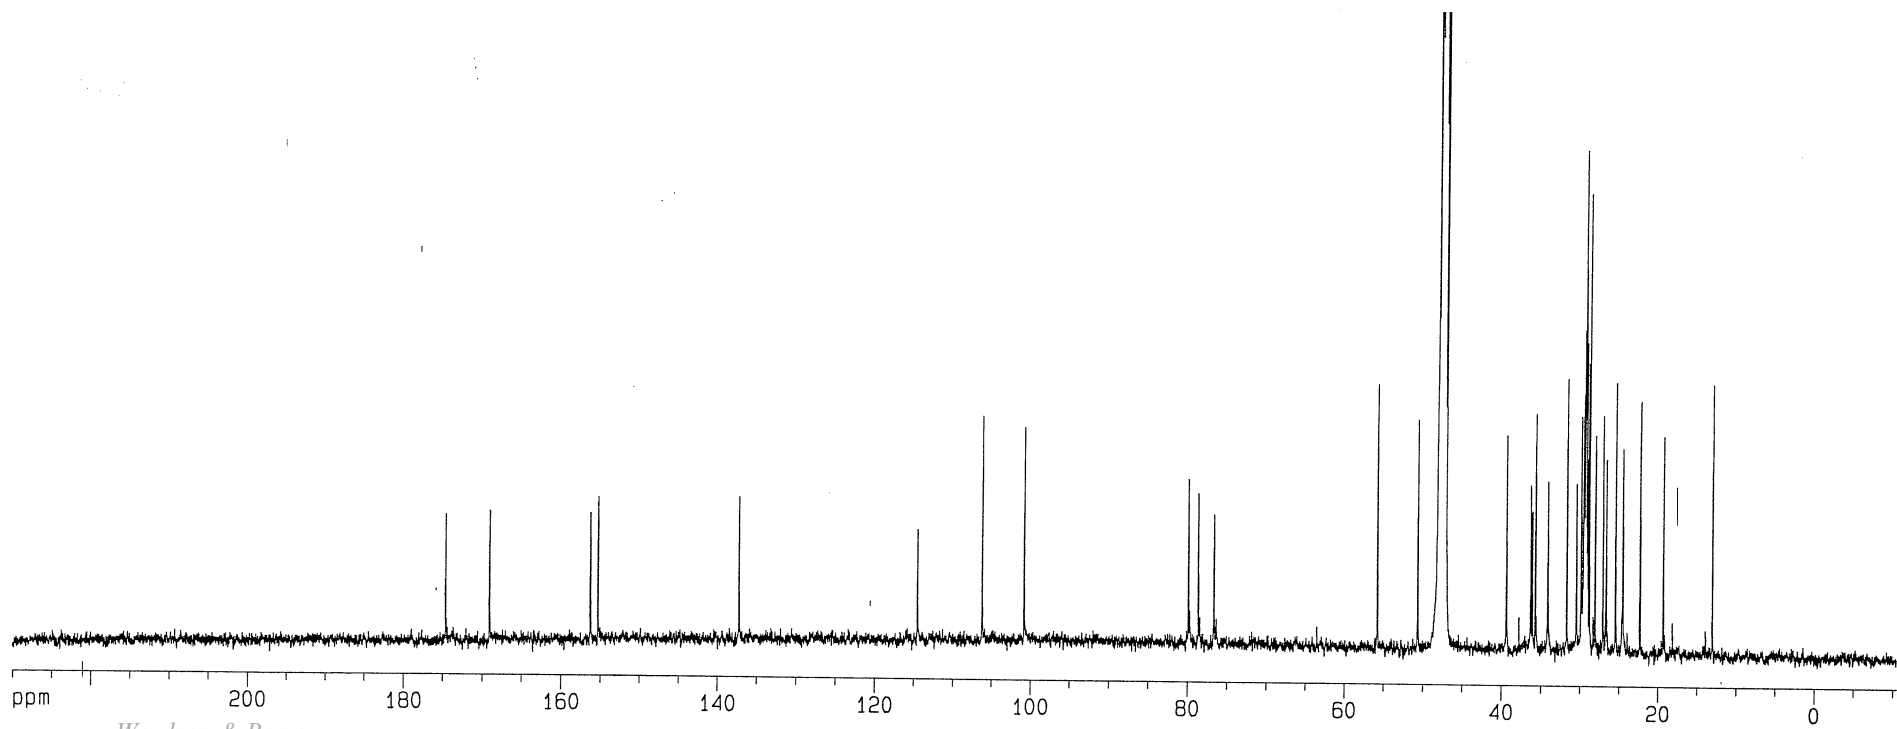

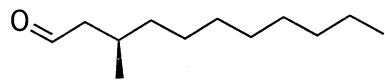

47

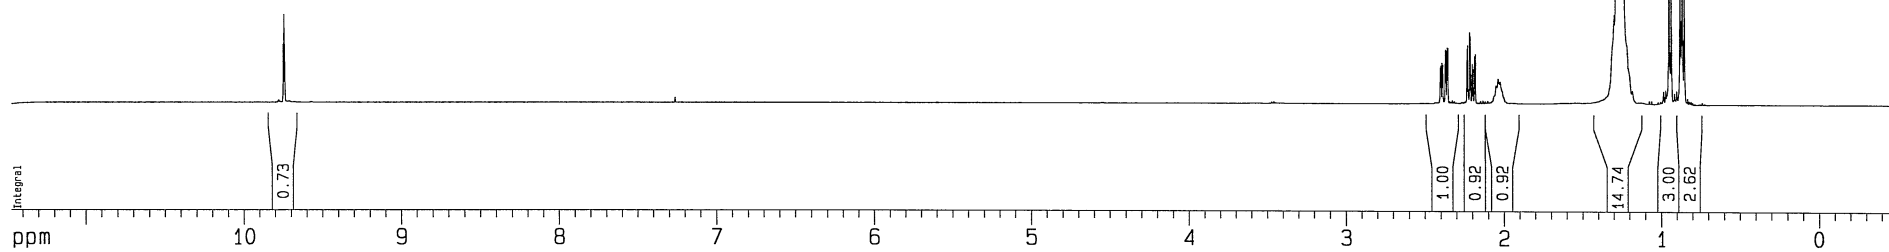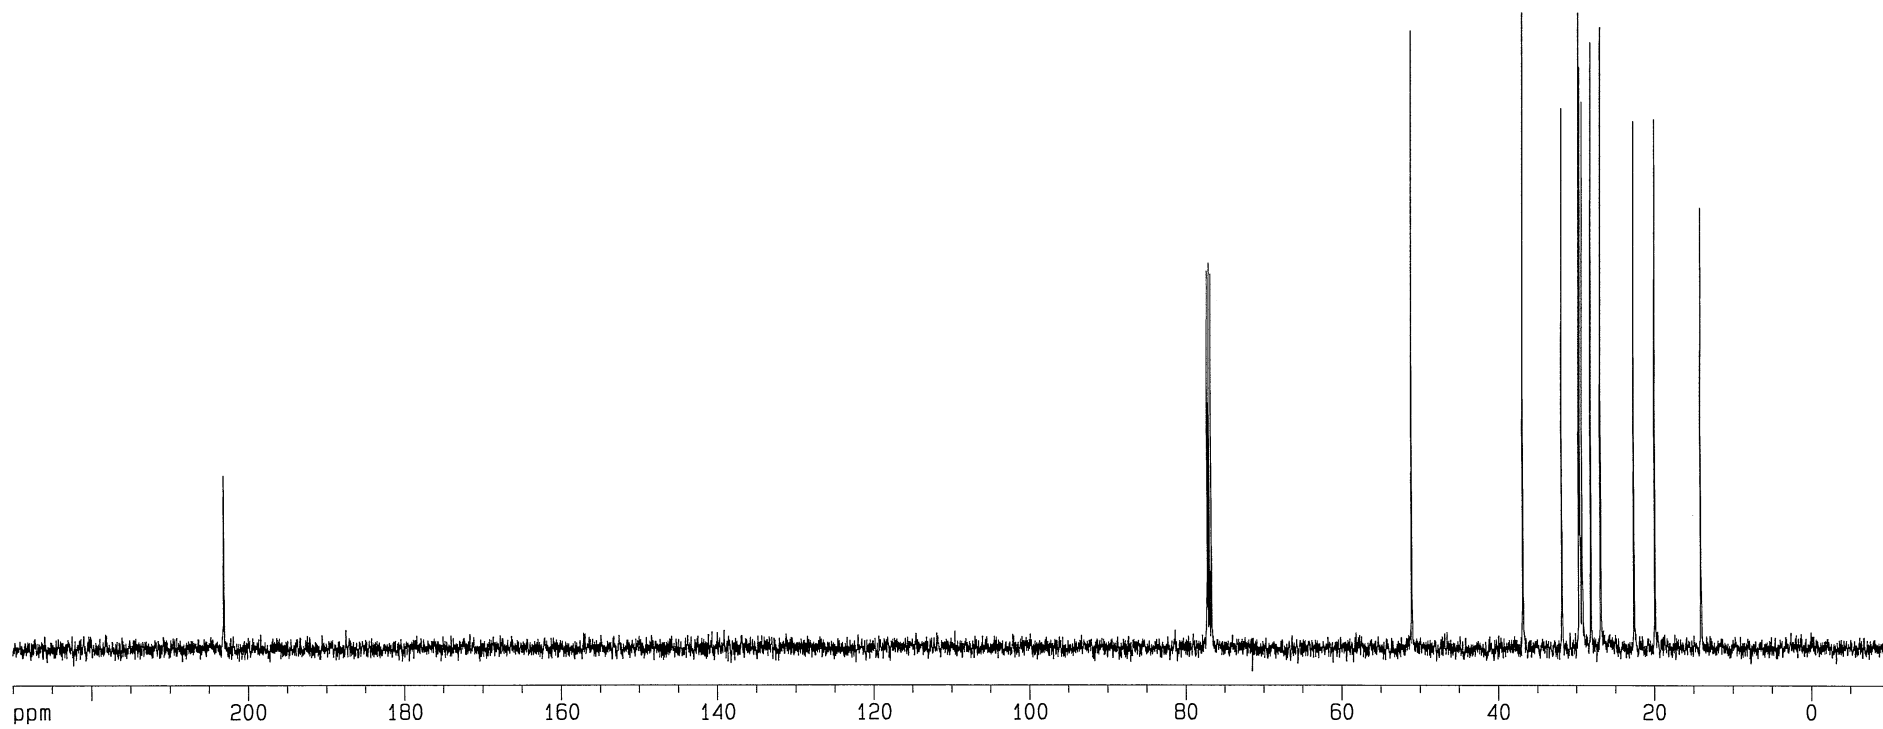

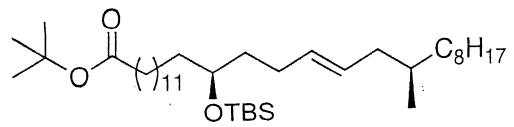**20**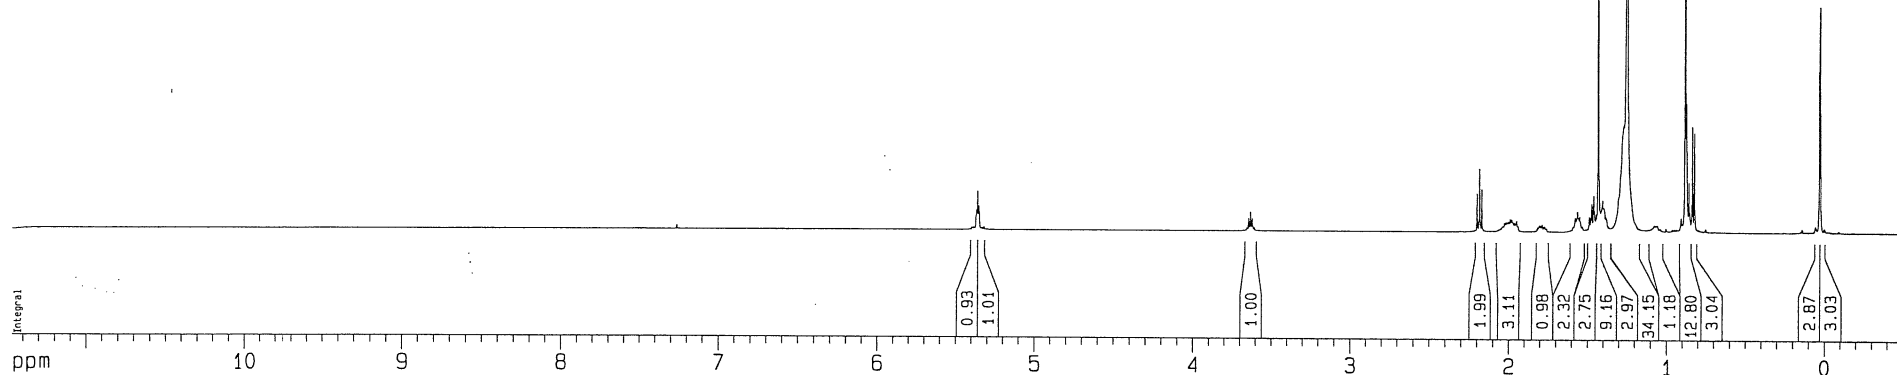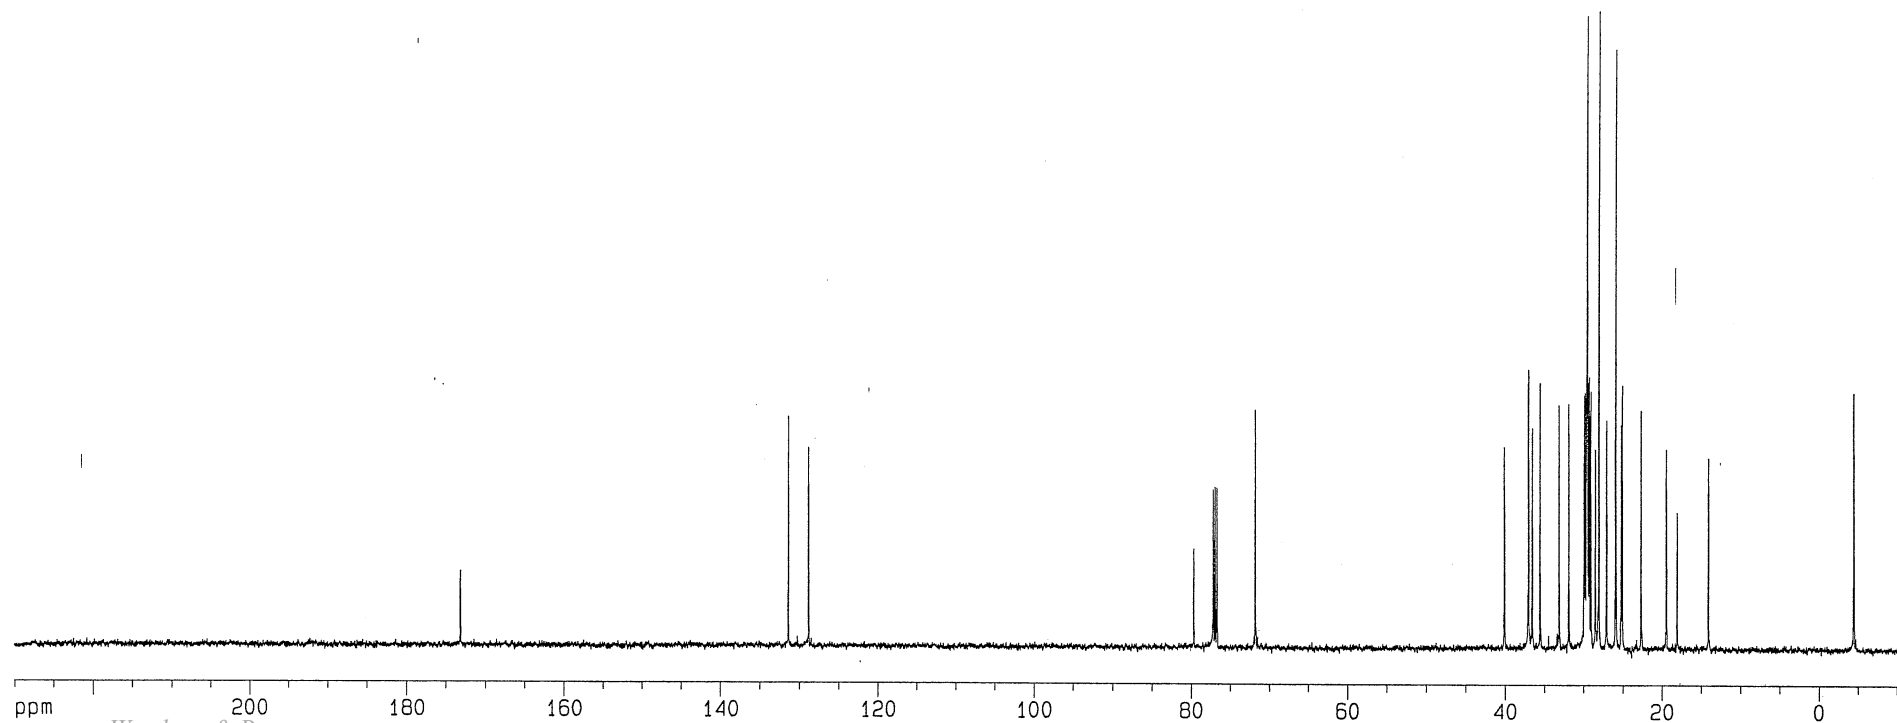



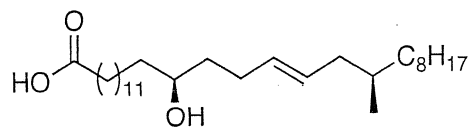**21**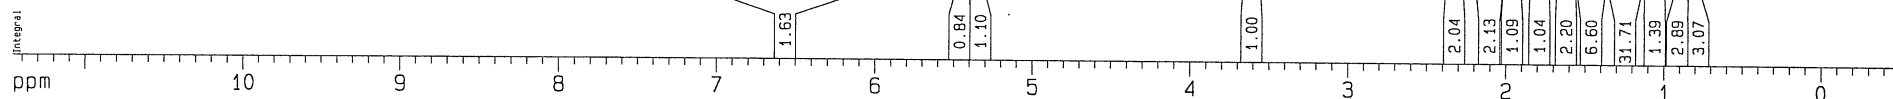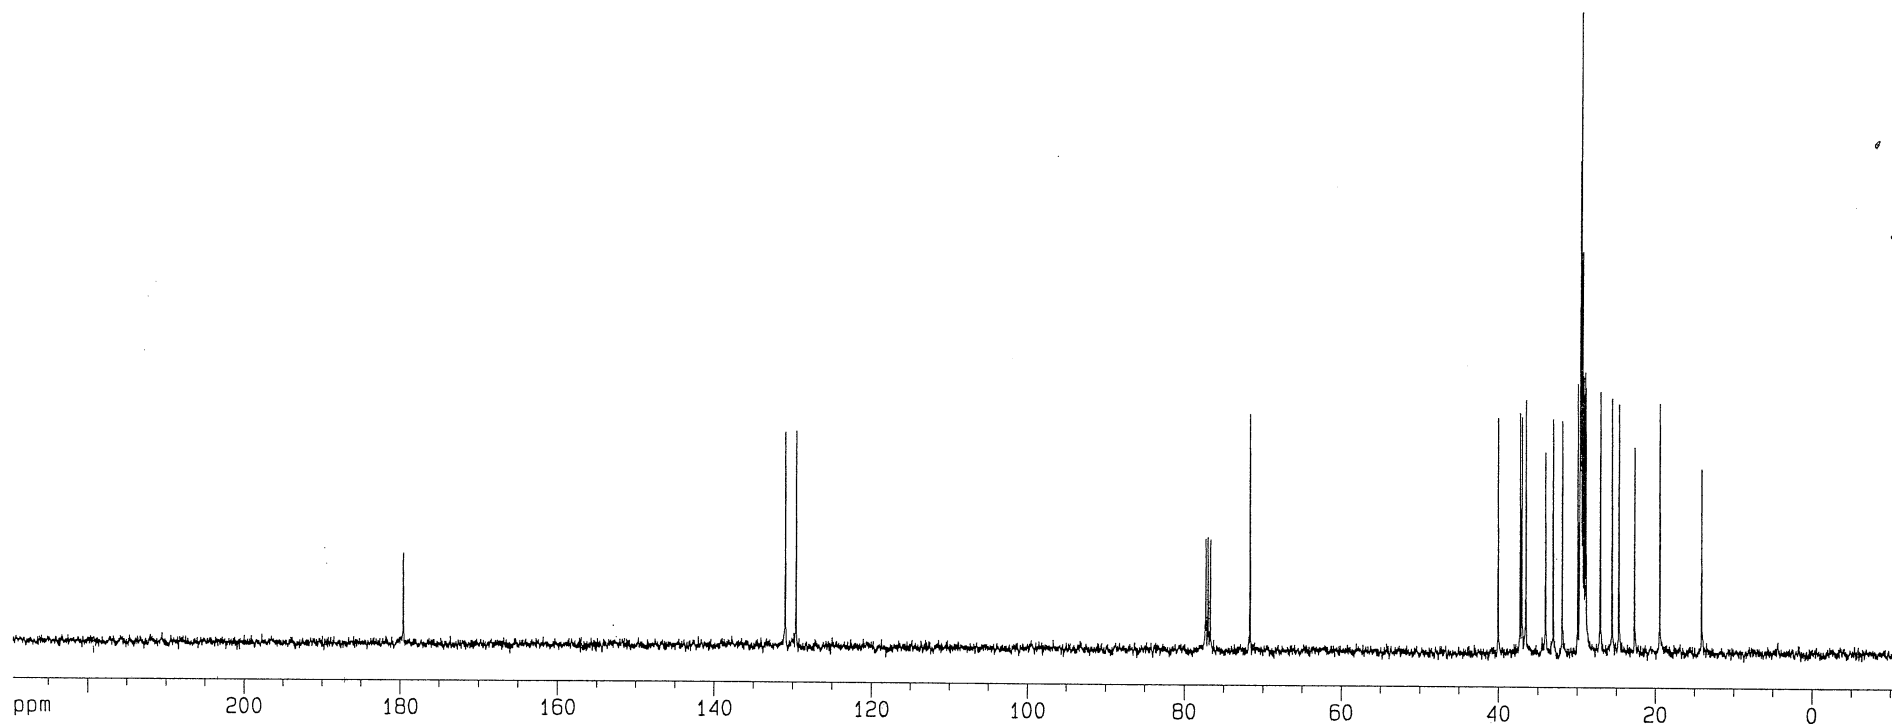

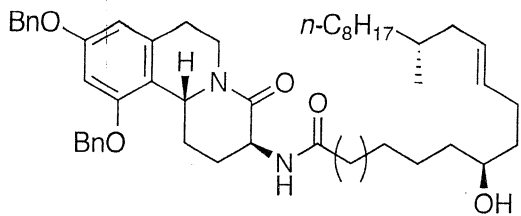**22**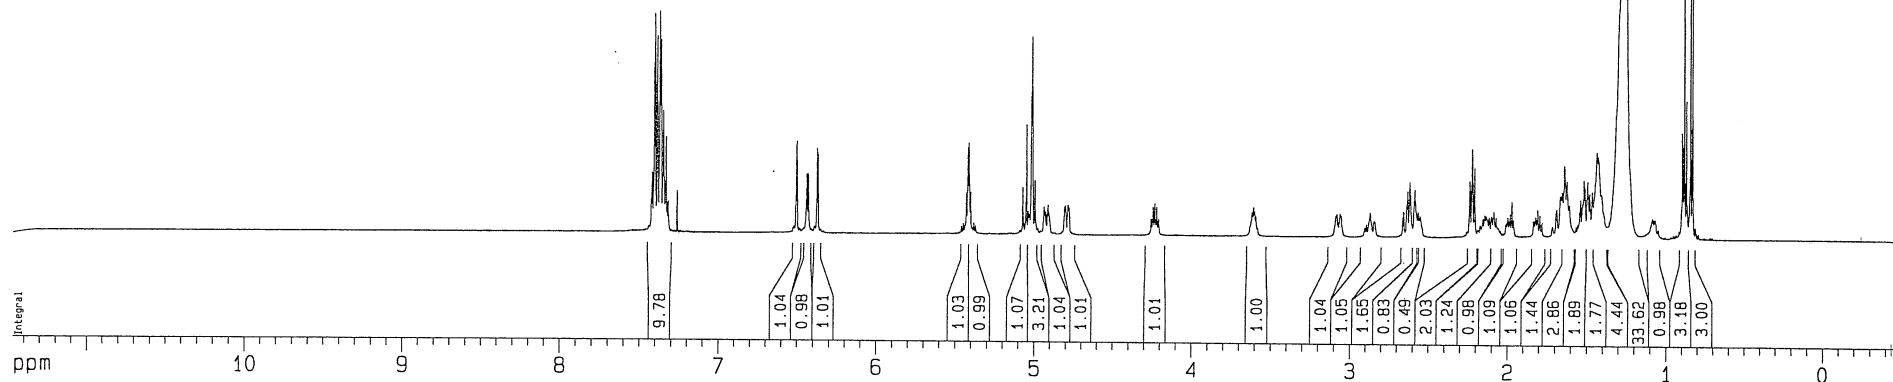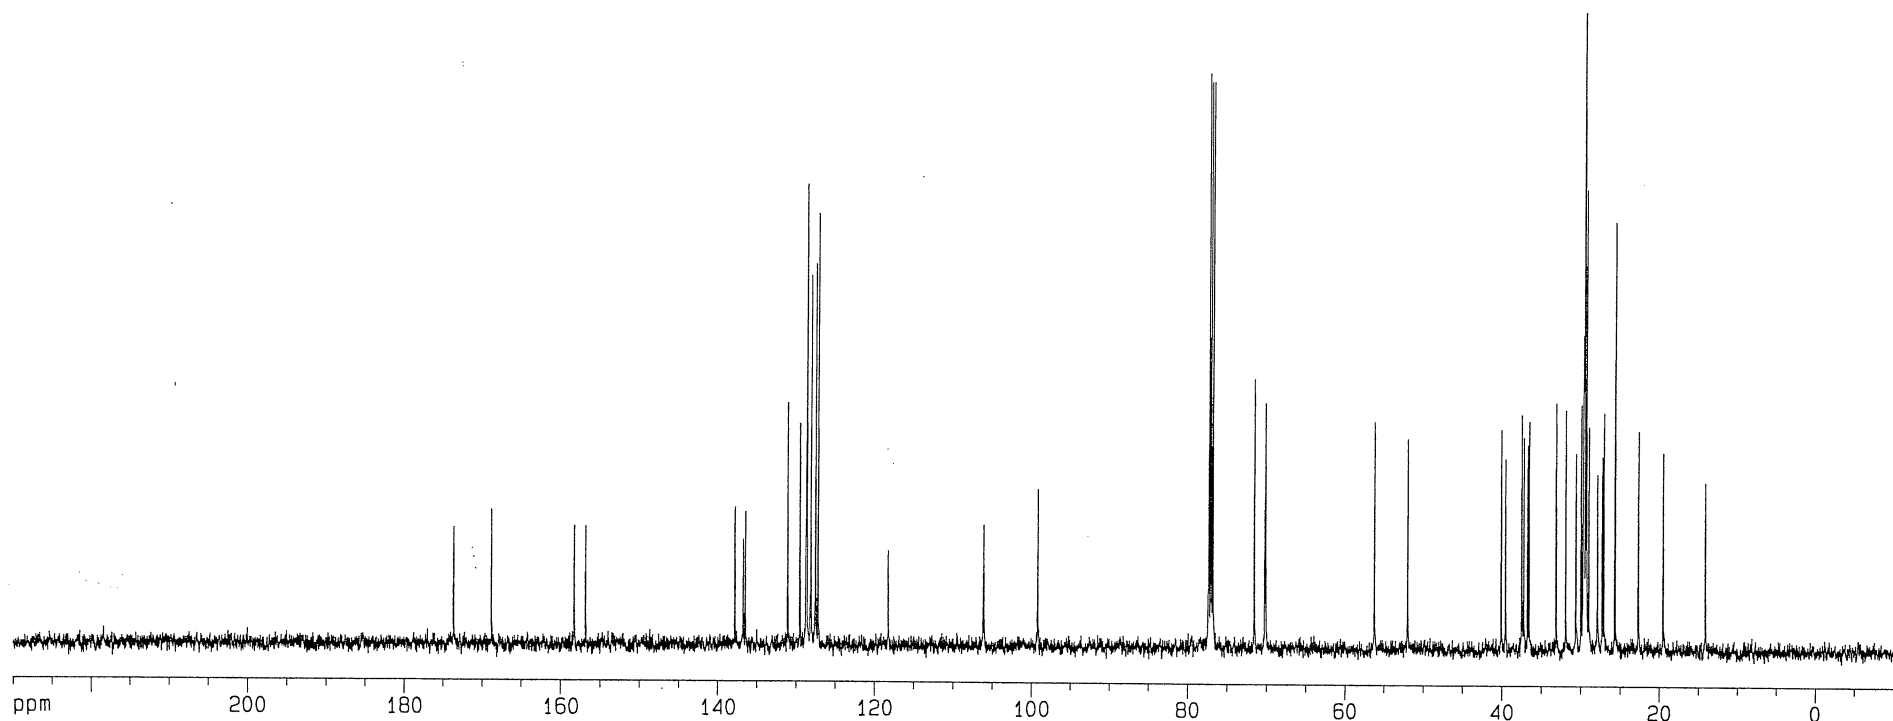

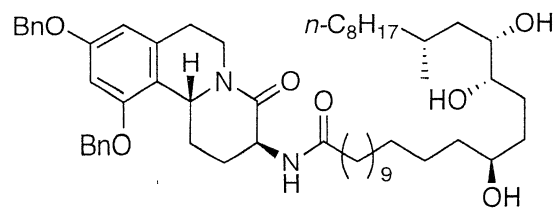**23**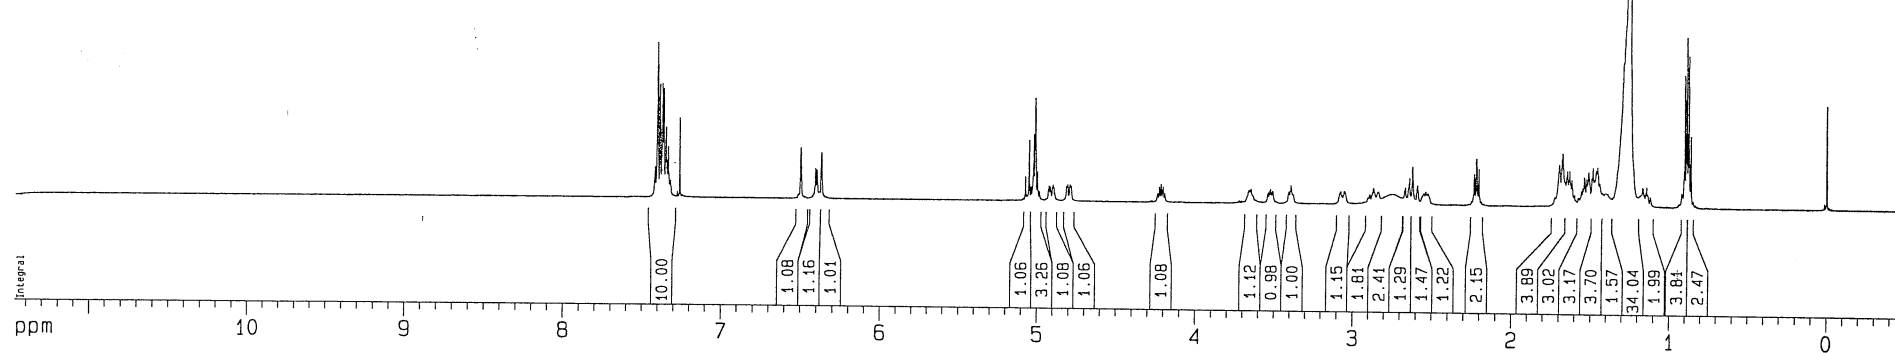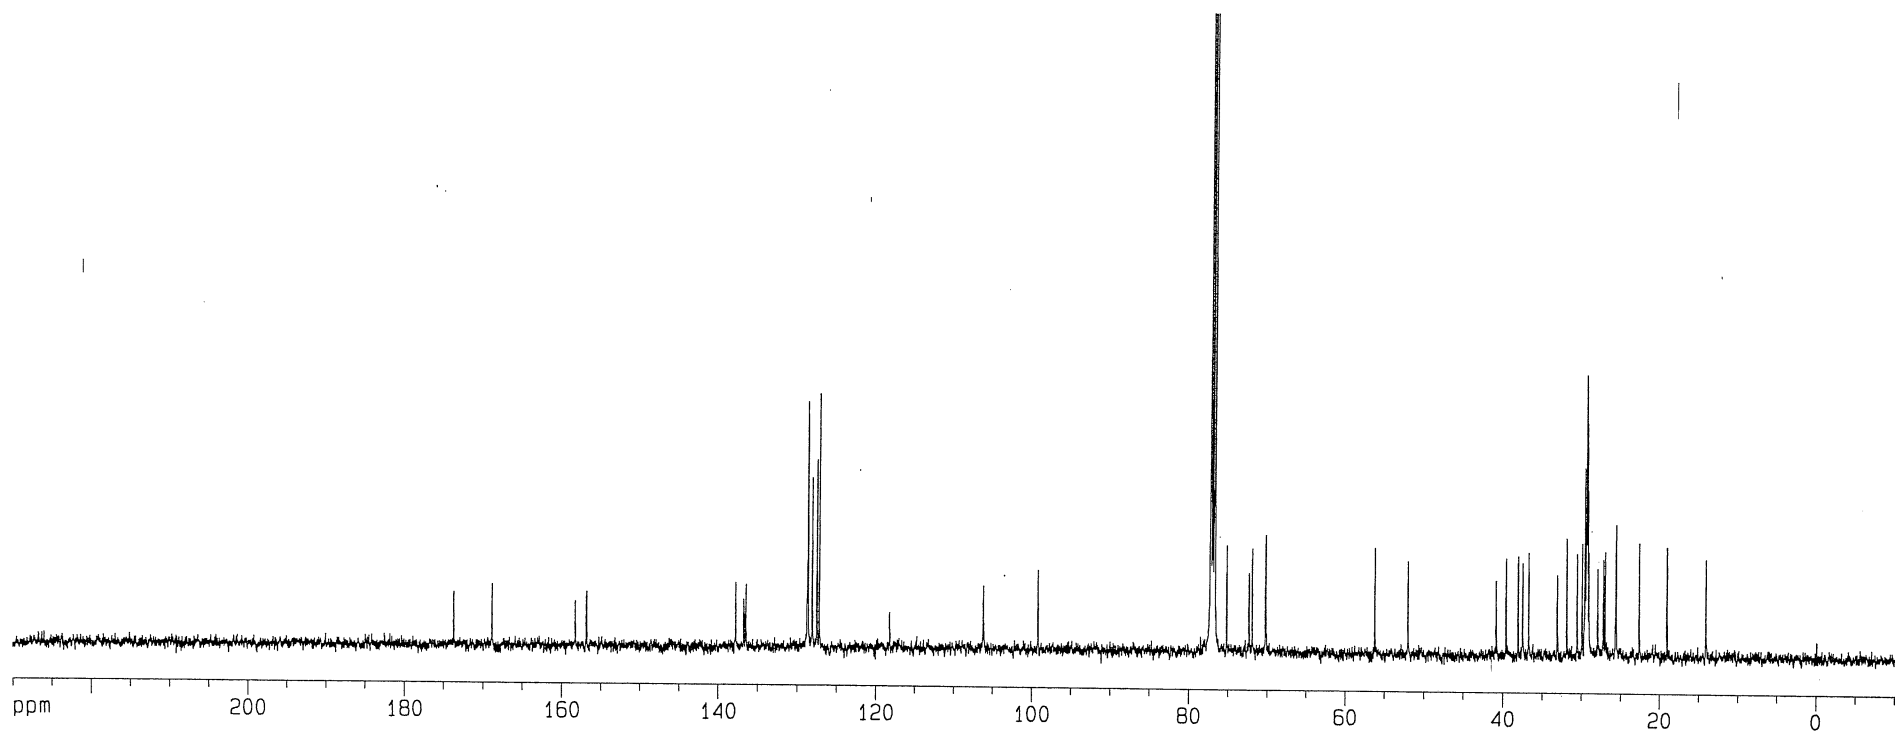

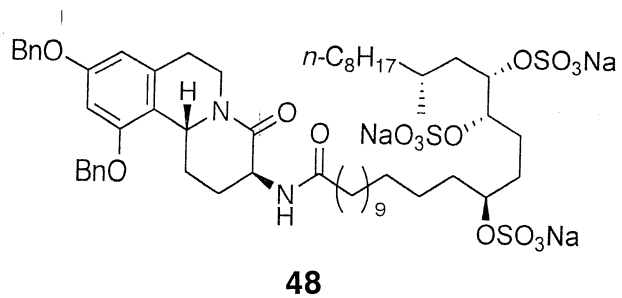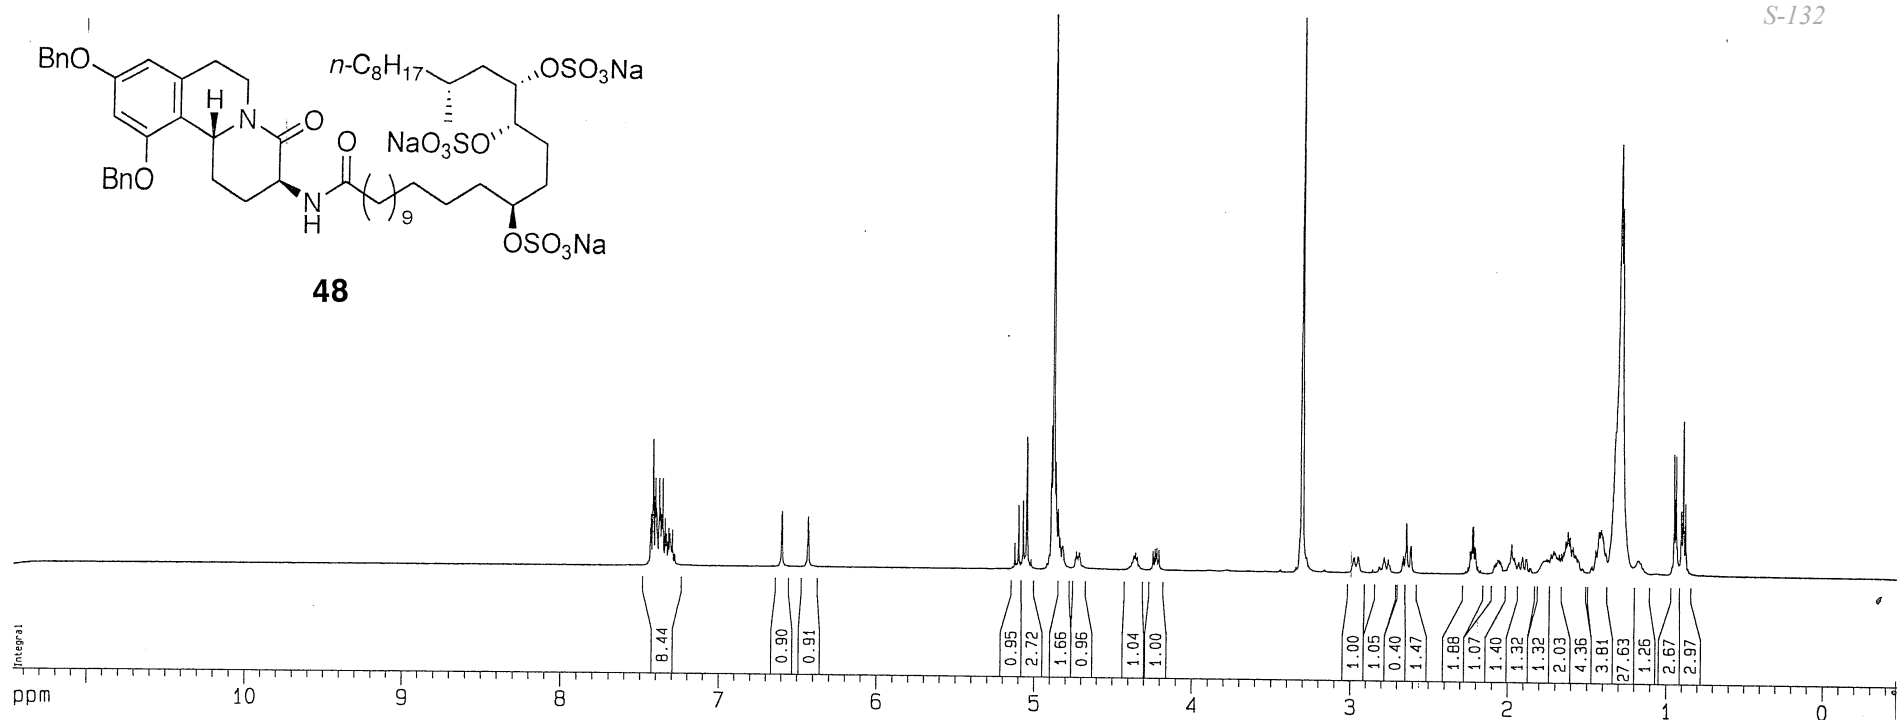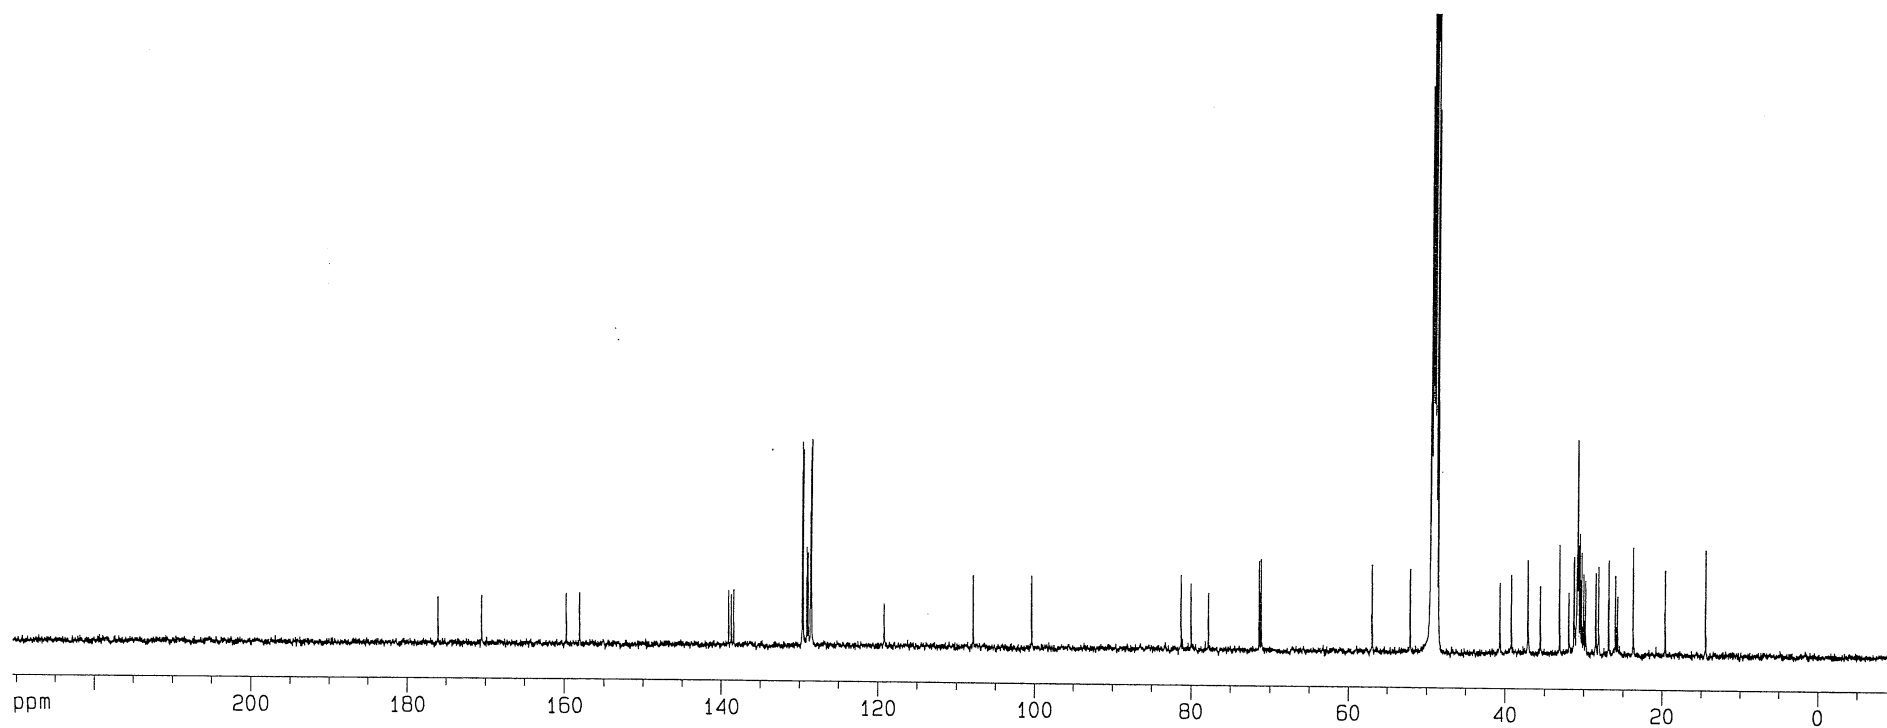

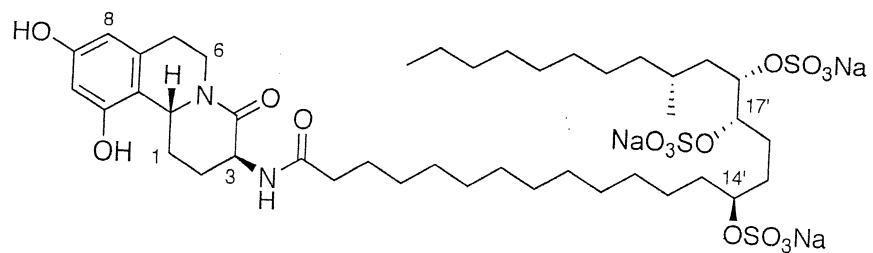**1**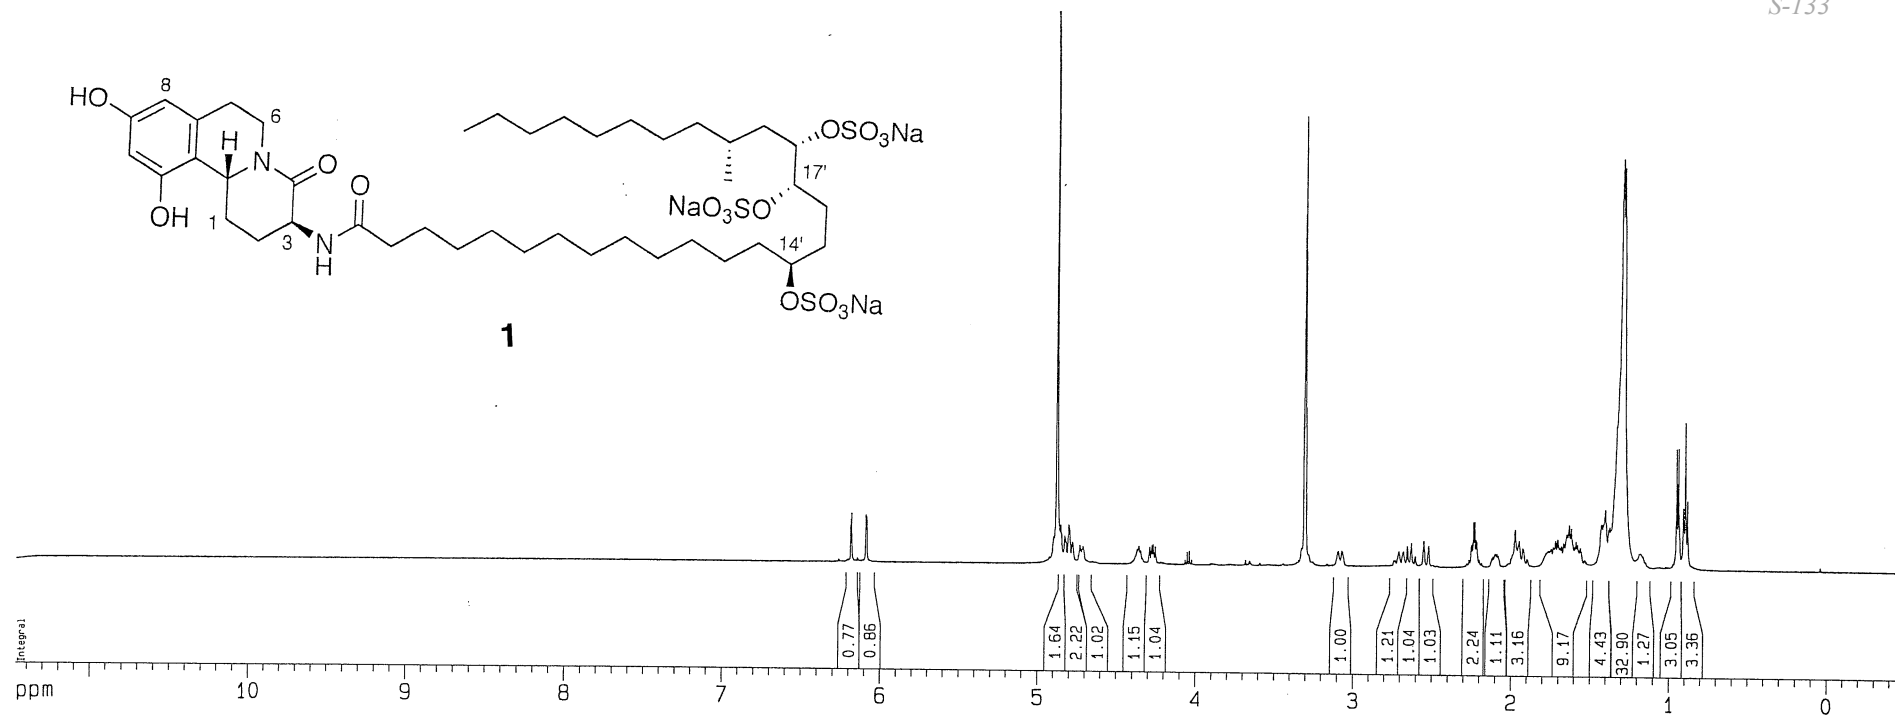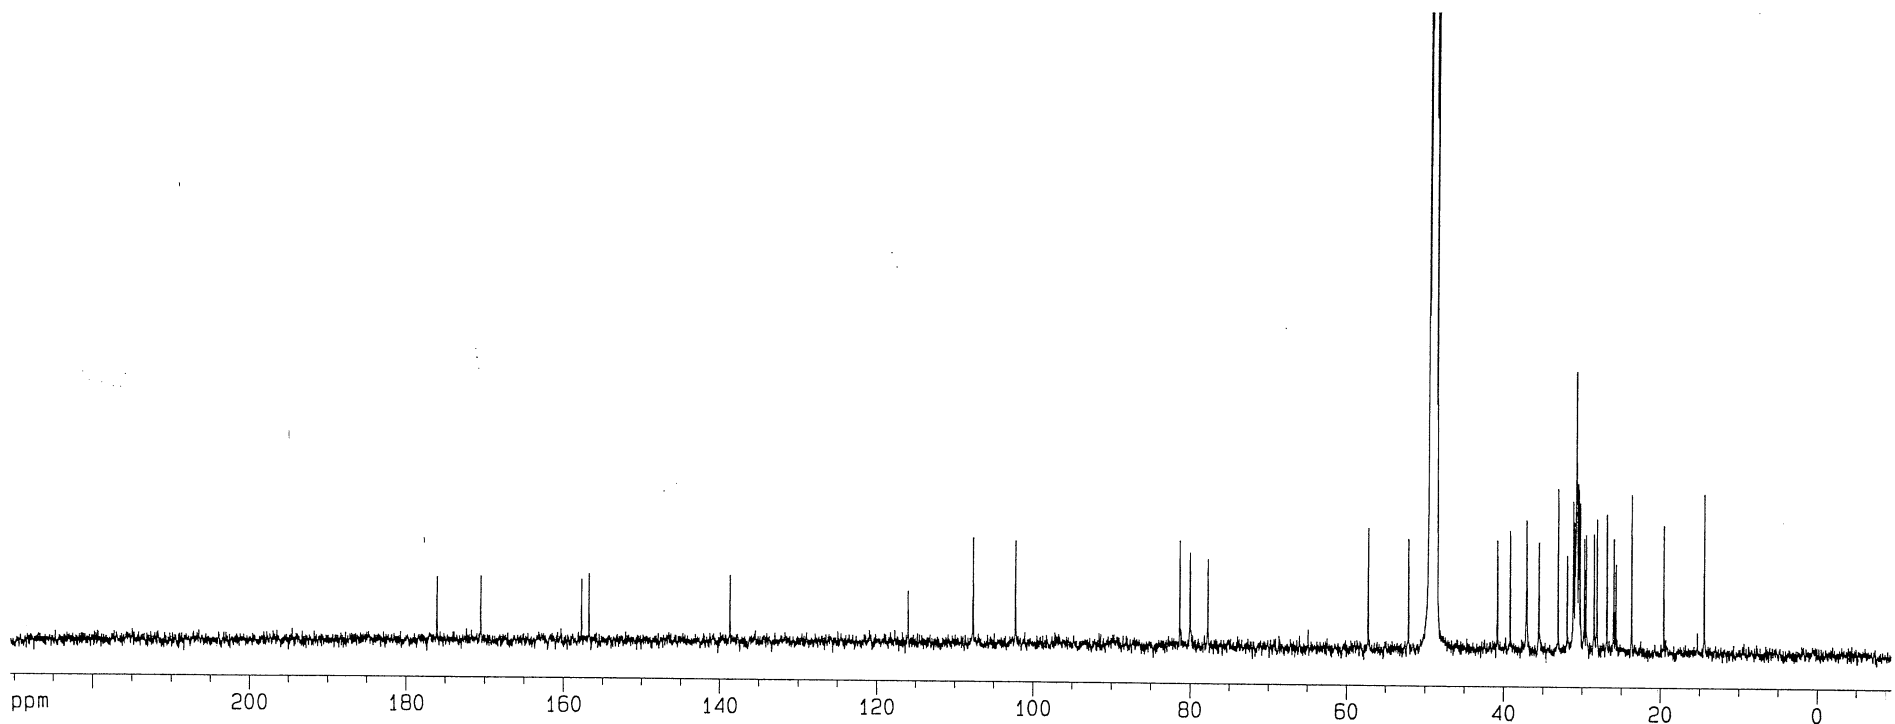

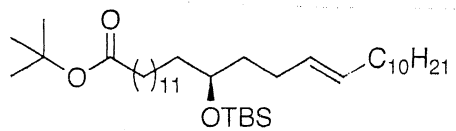

49

S-134

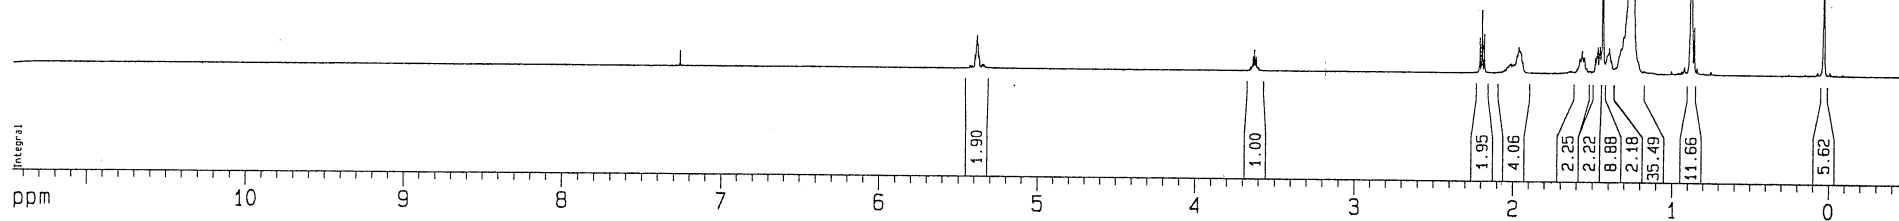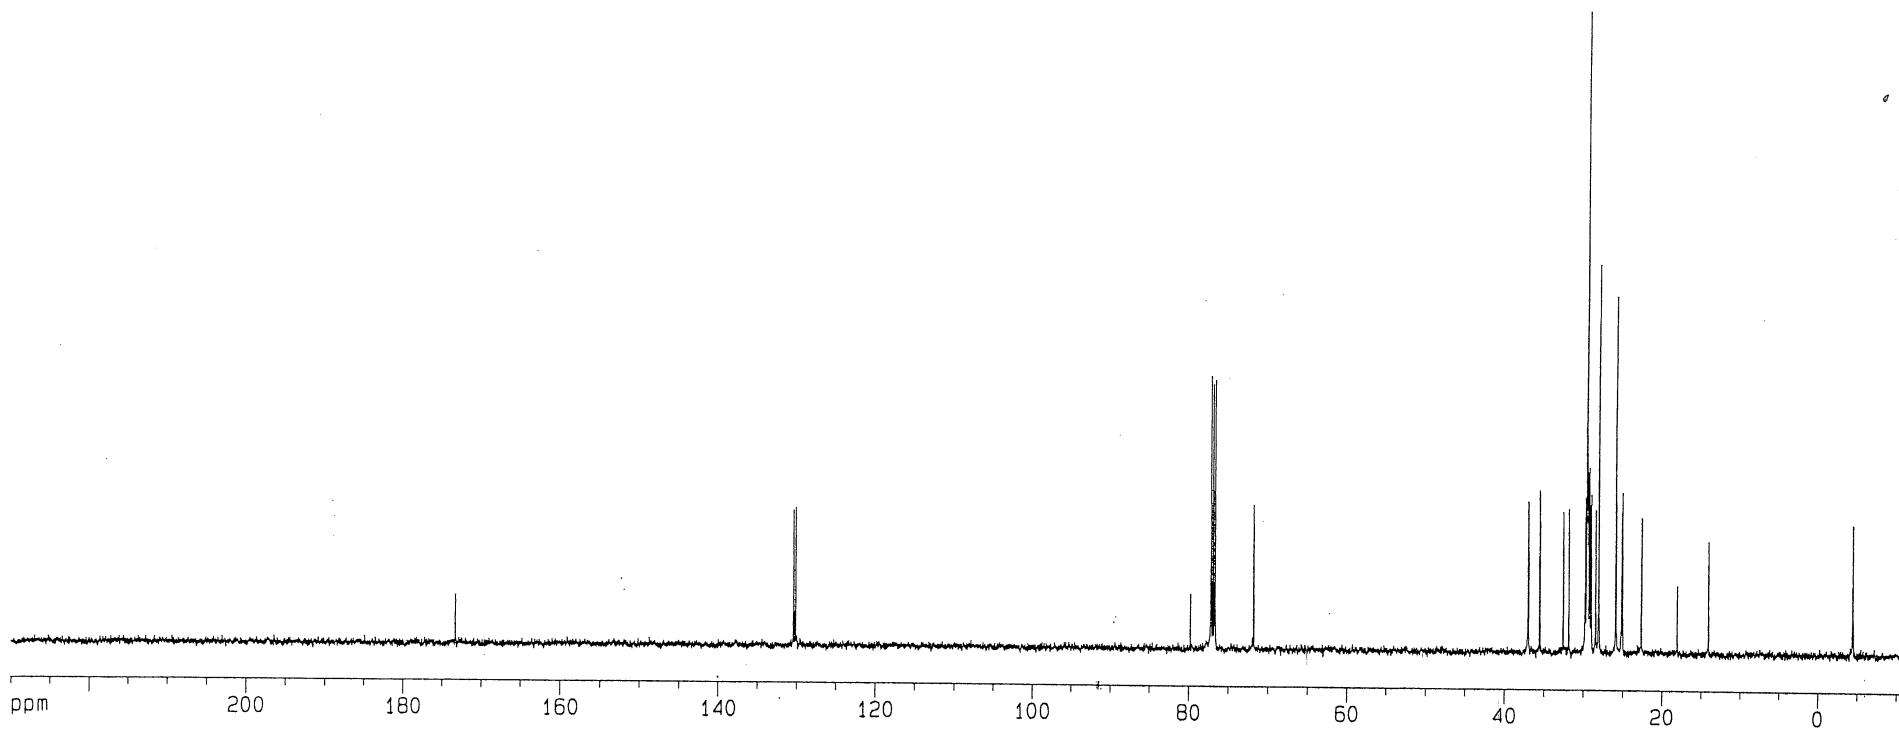

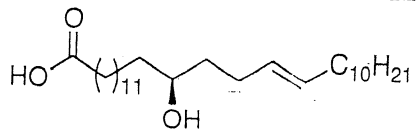

S-135

50

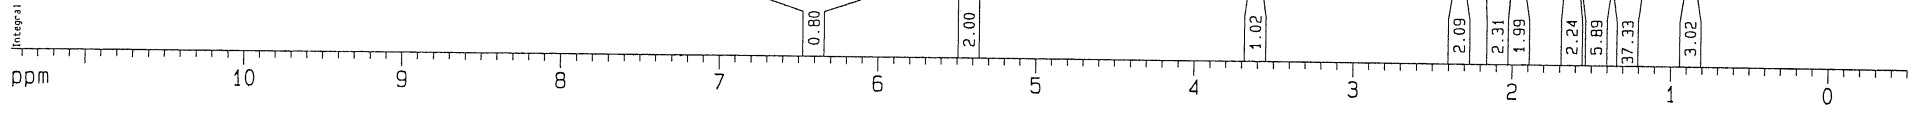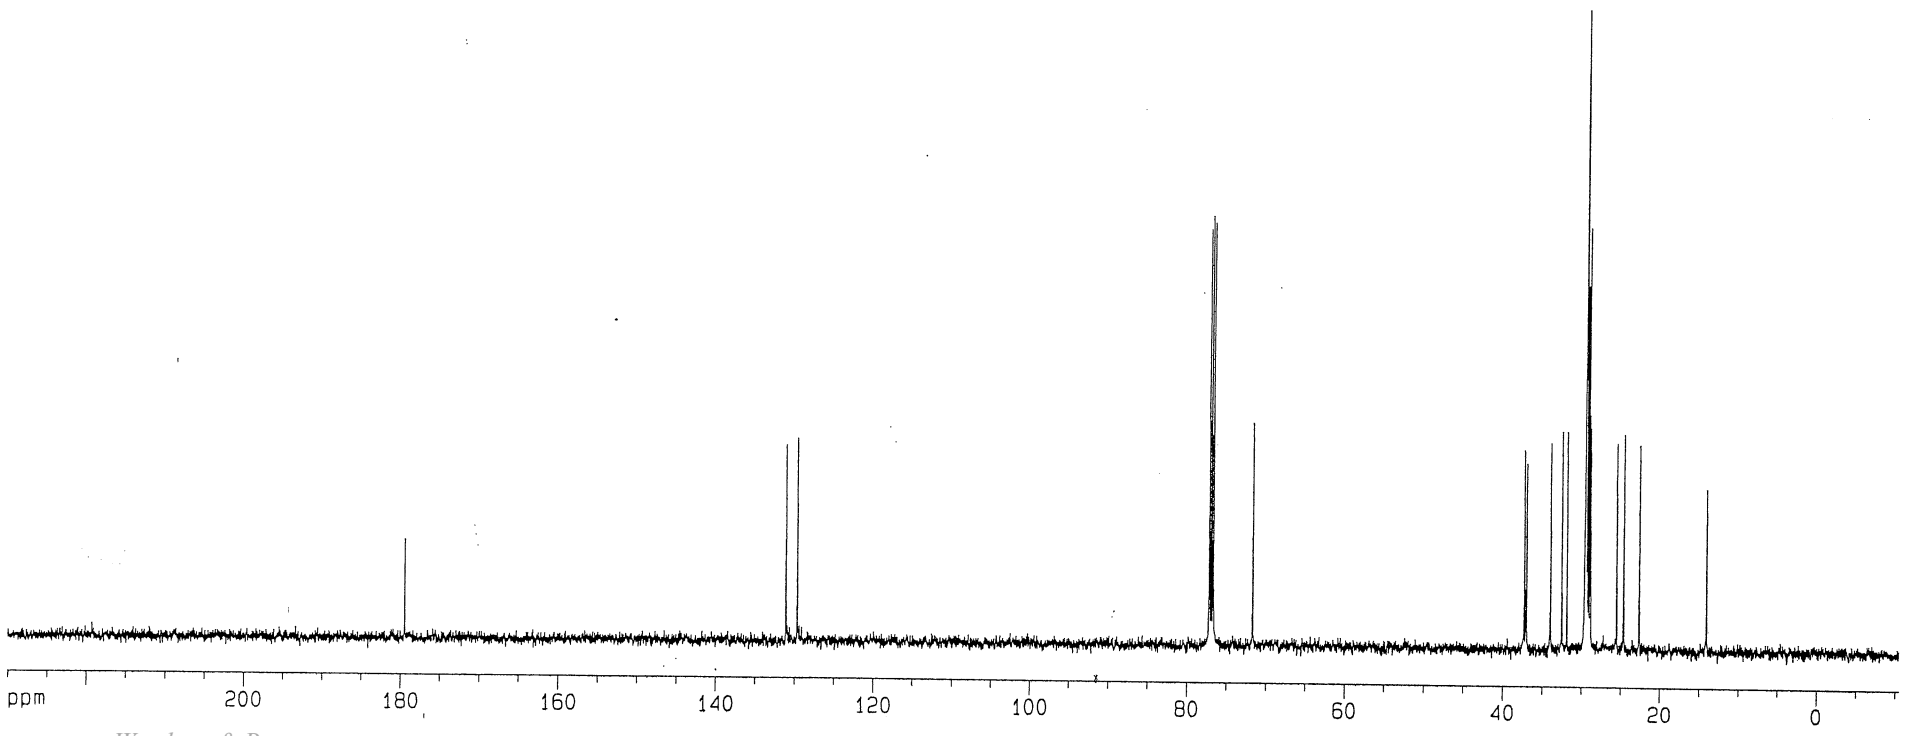

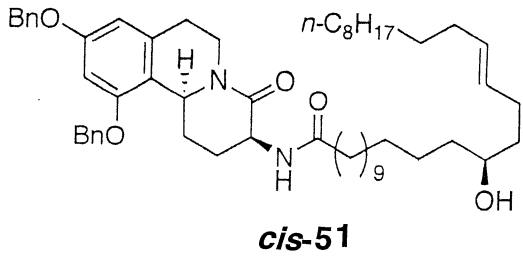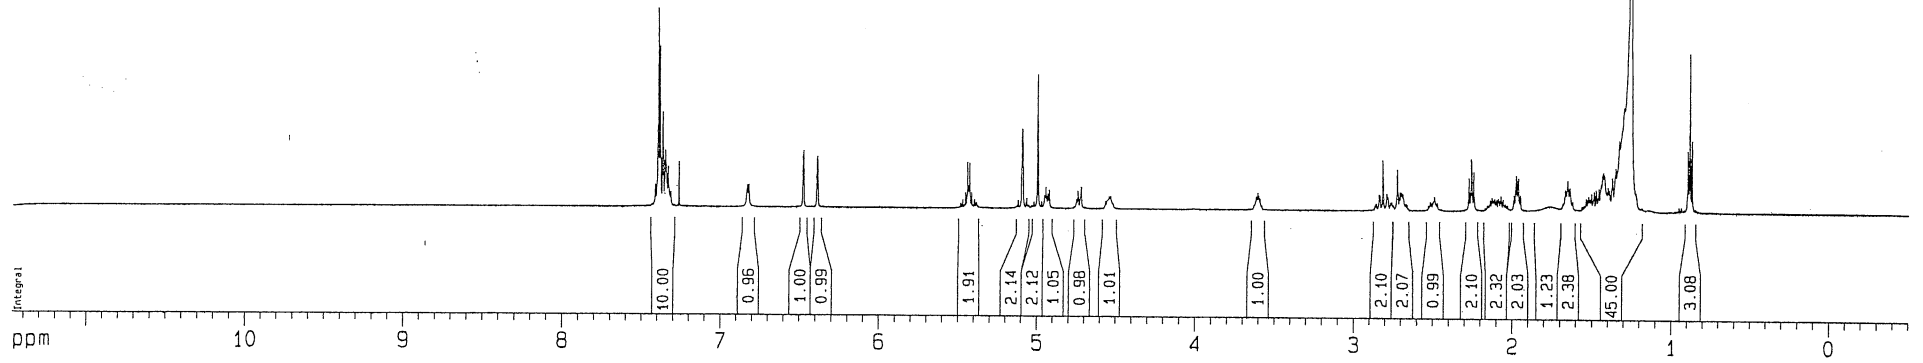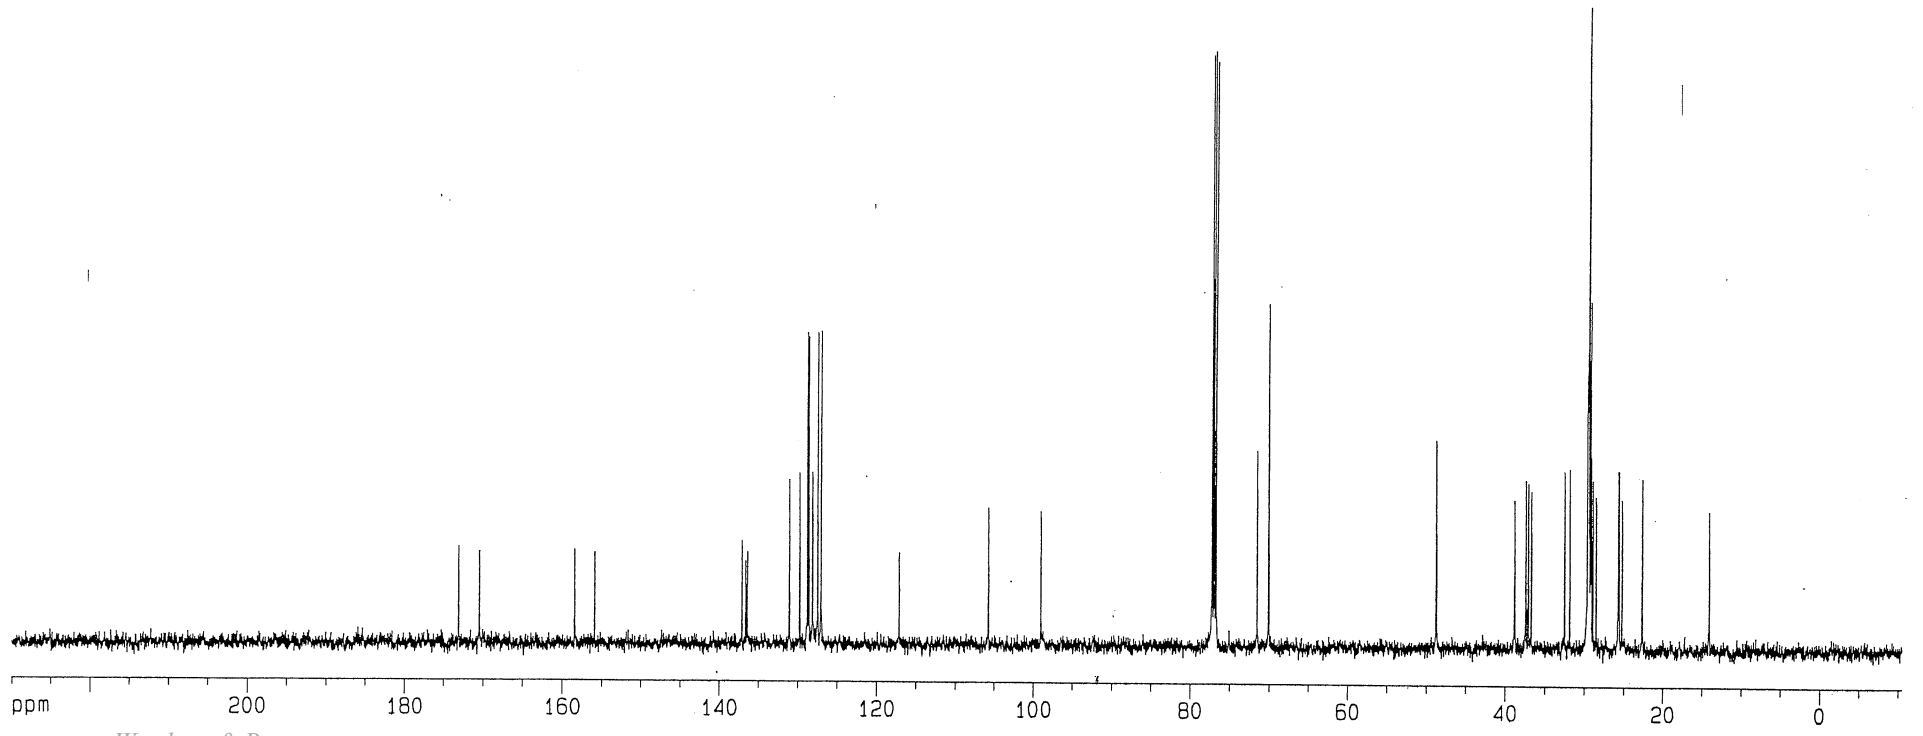



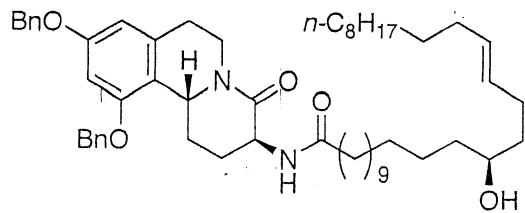

S-137

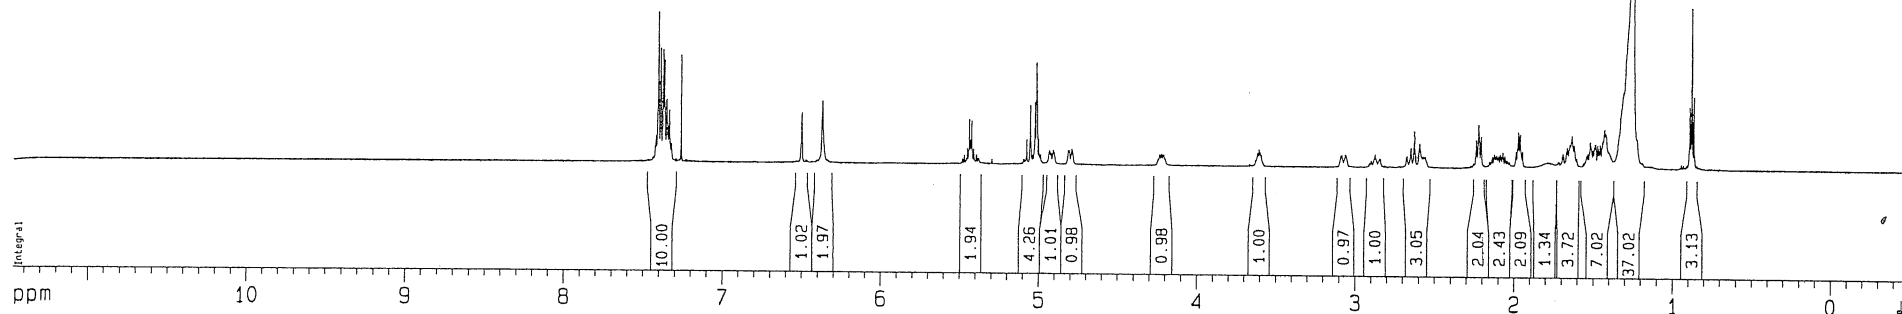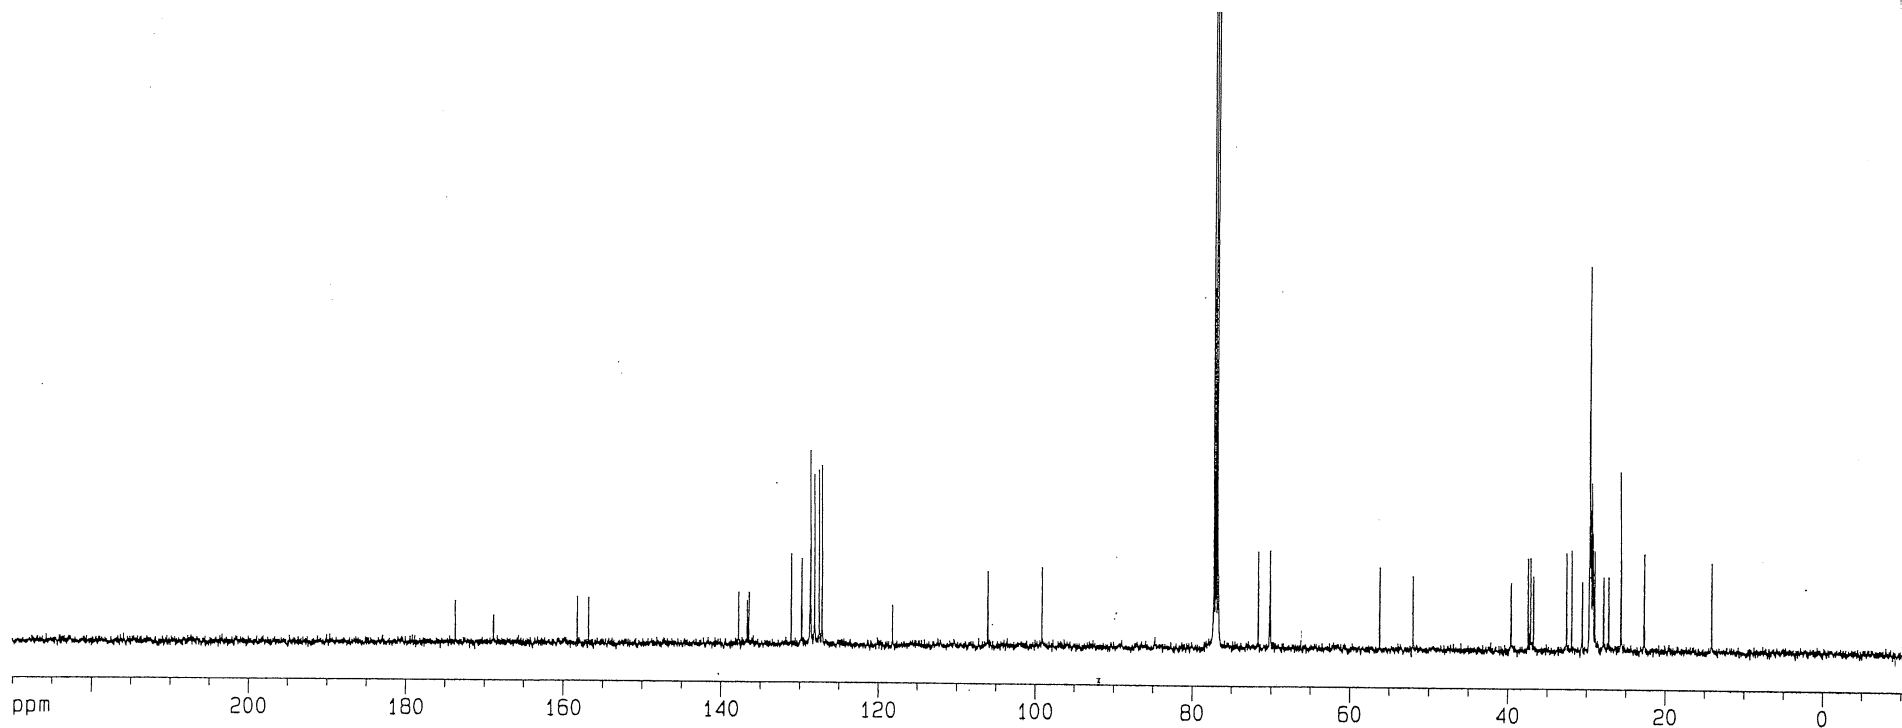

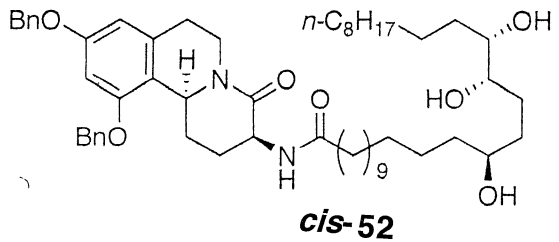

S-138

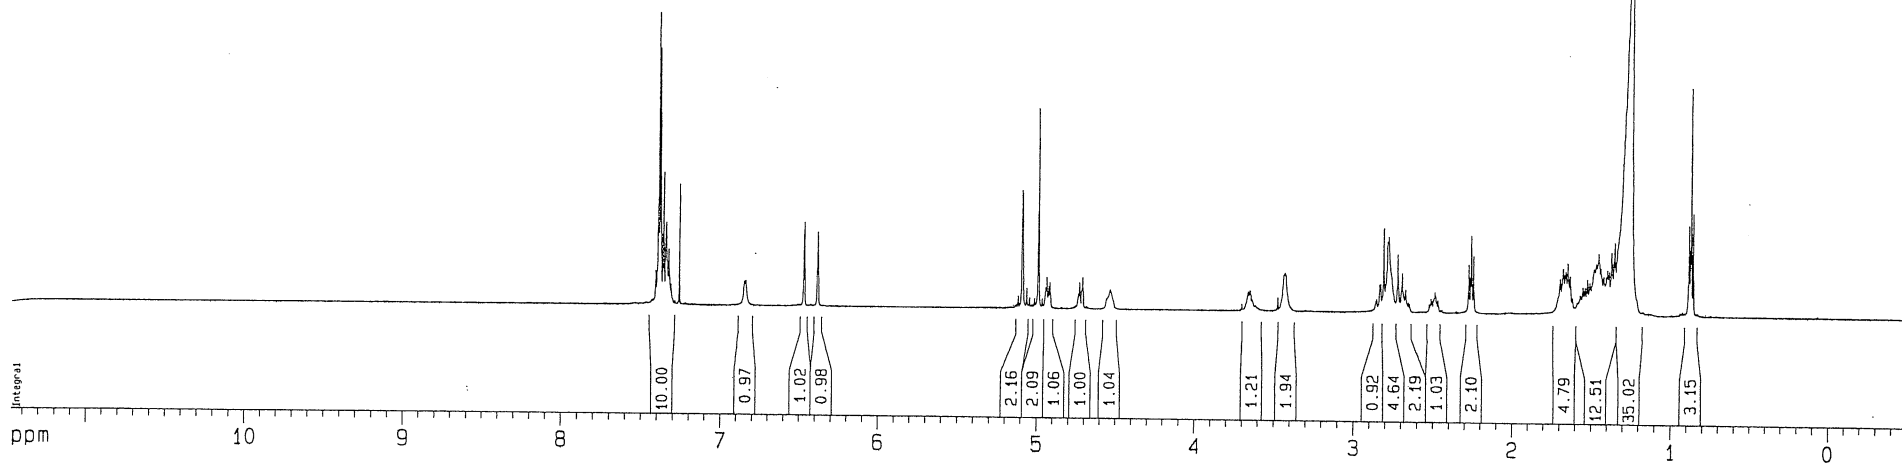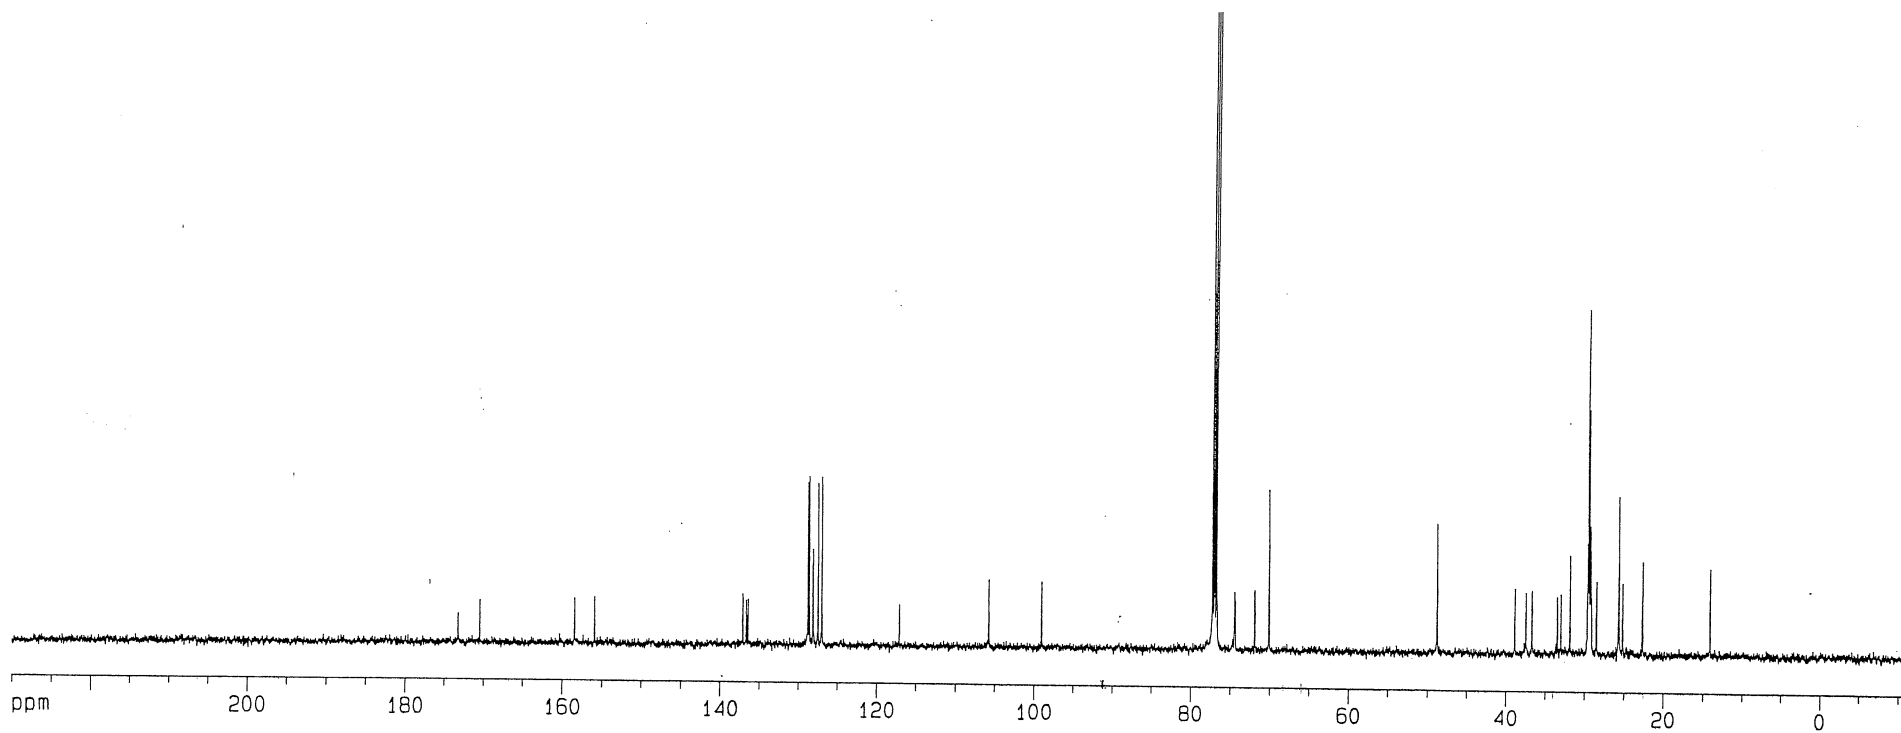

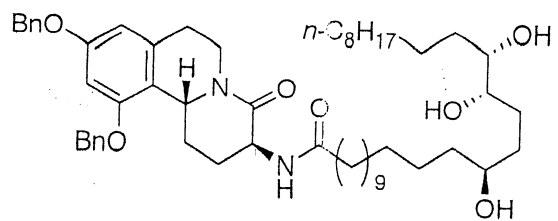*trans*-52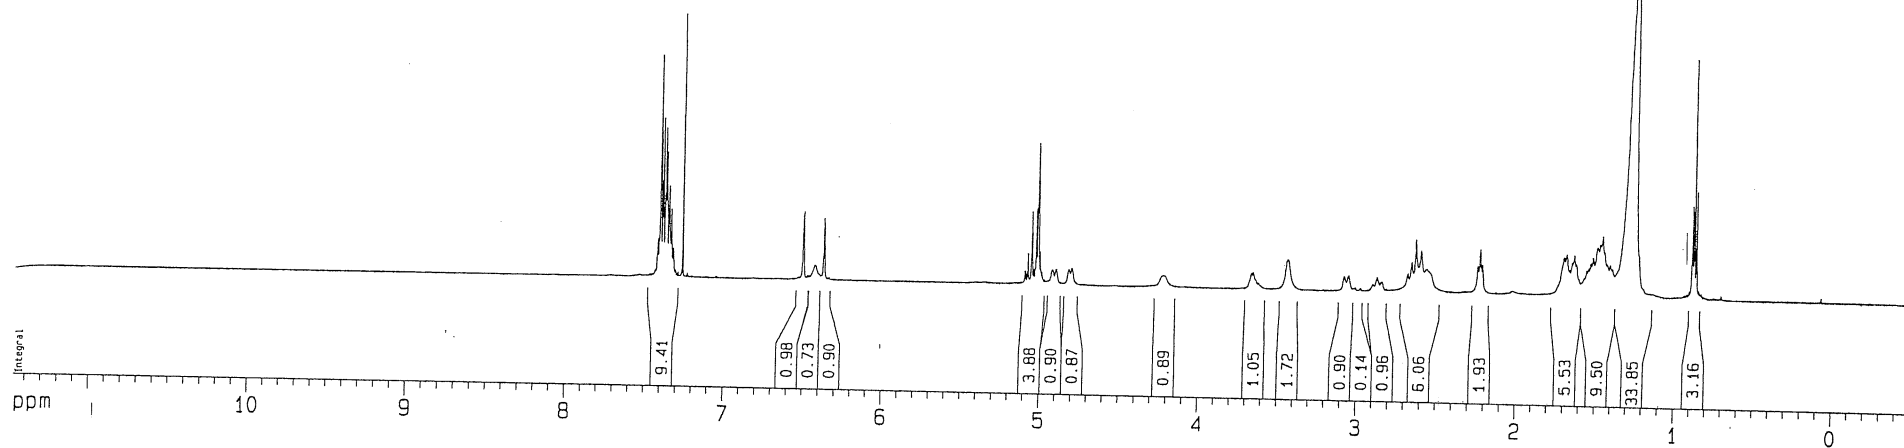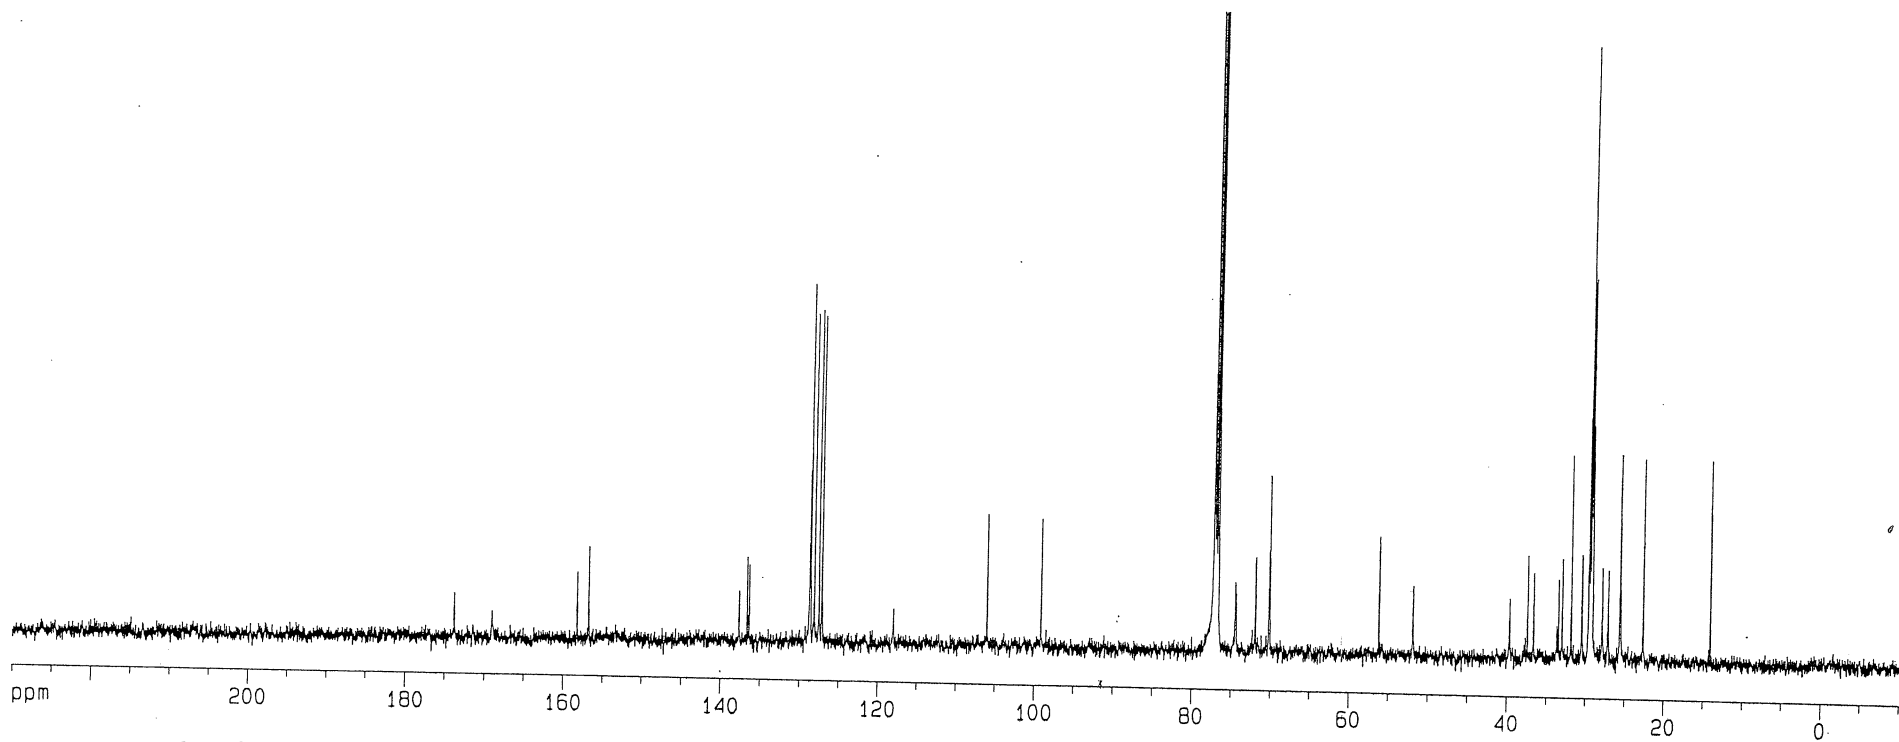

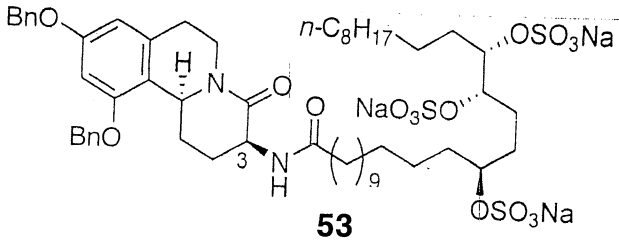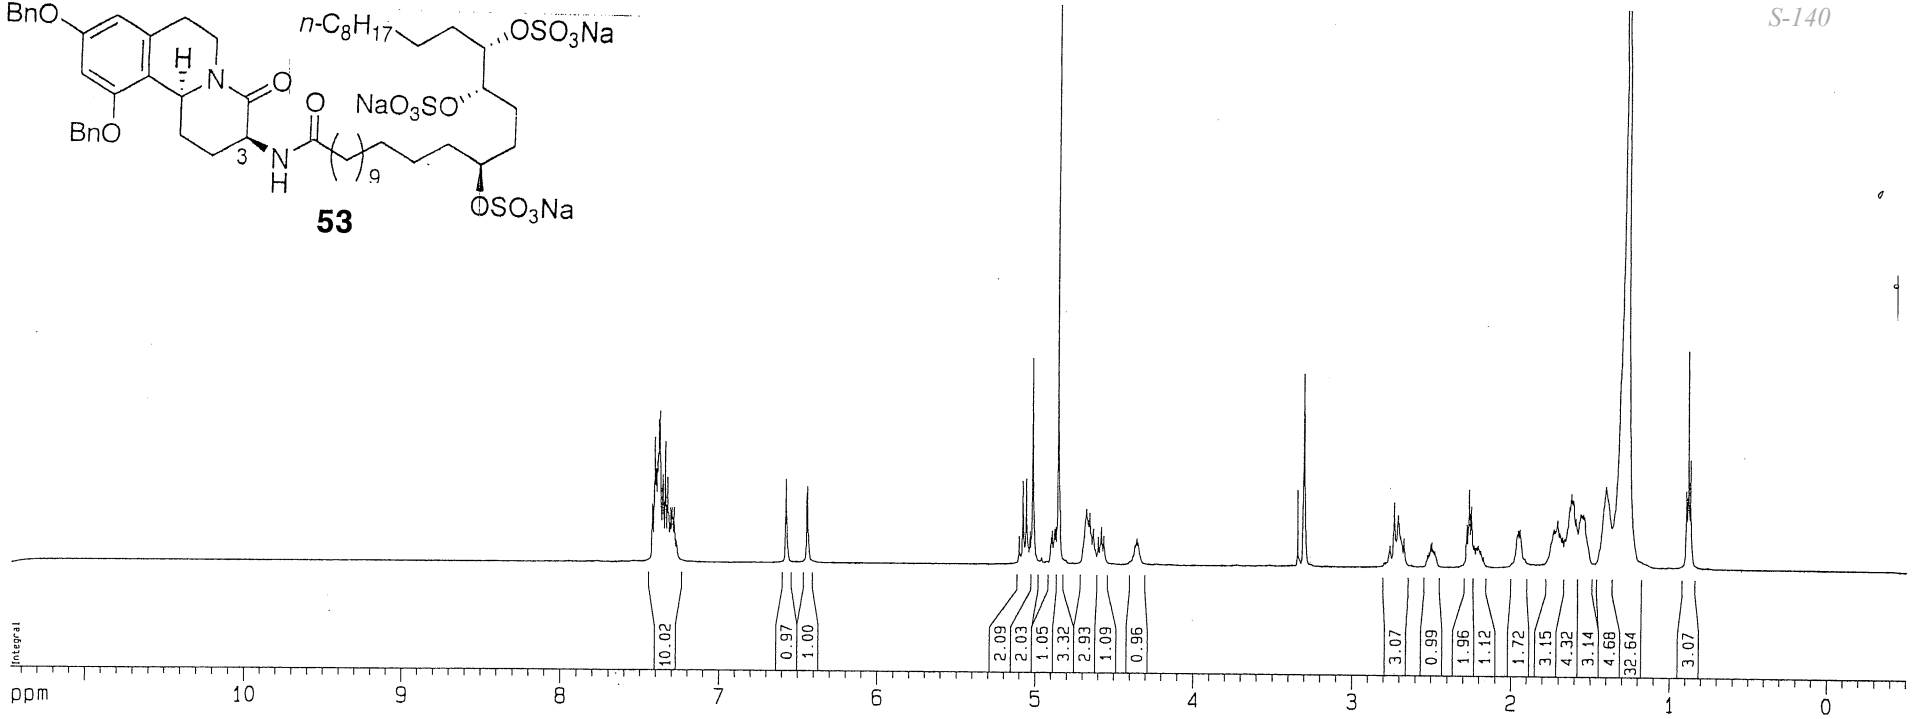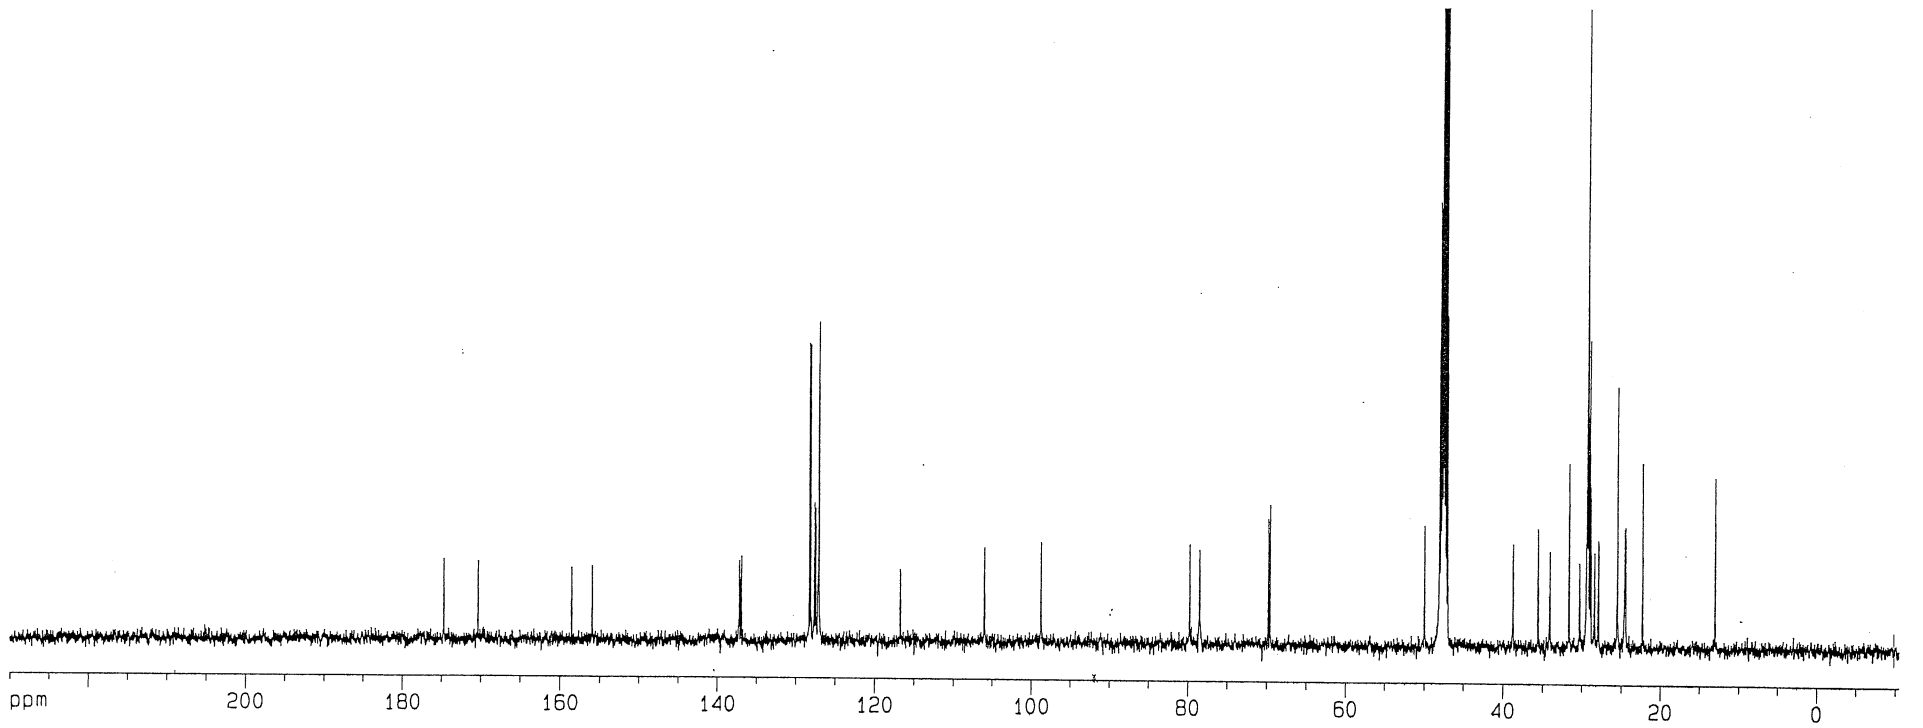

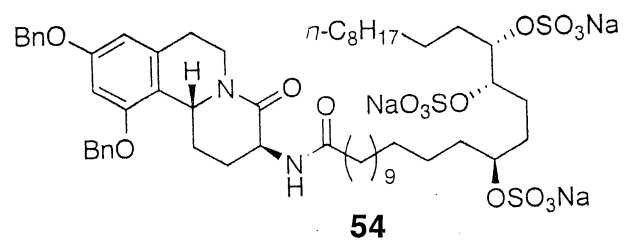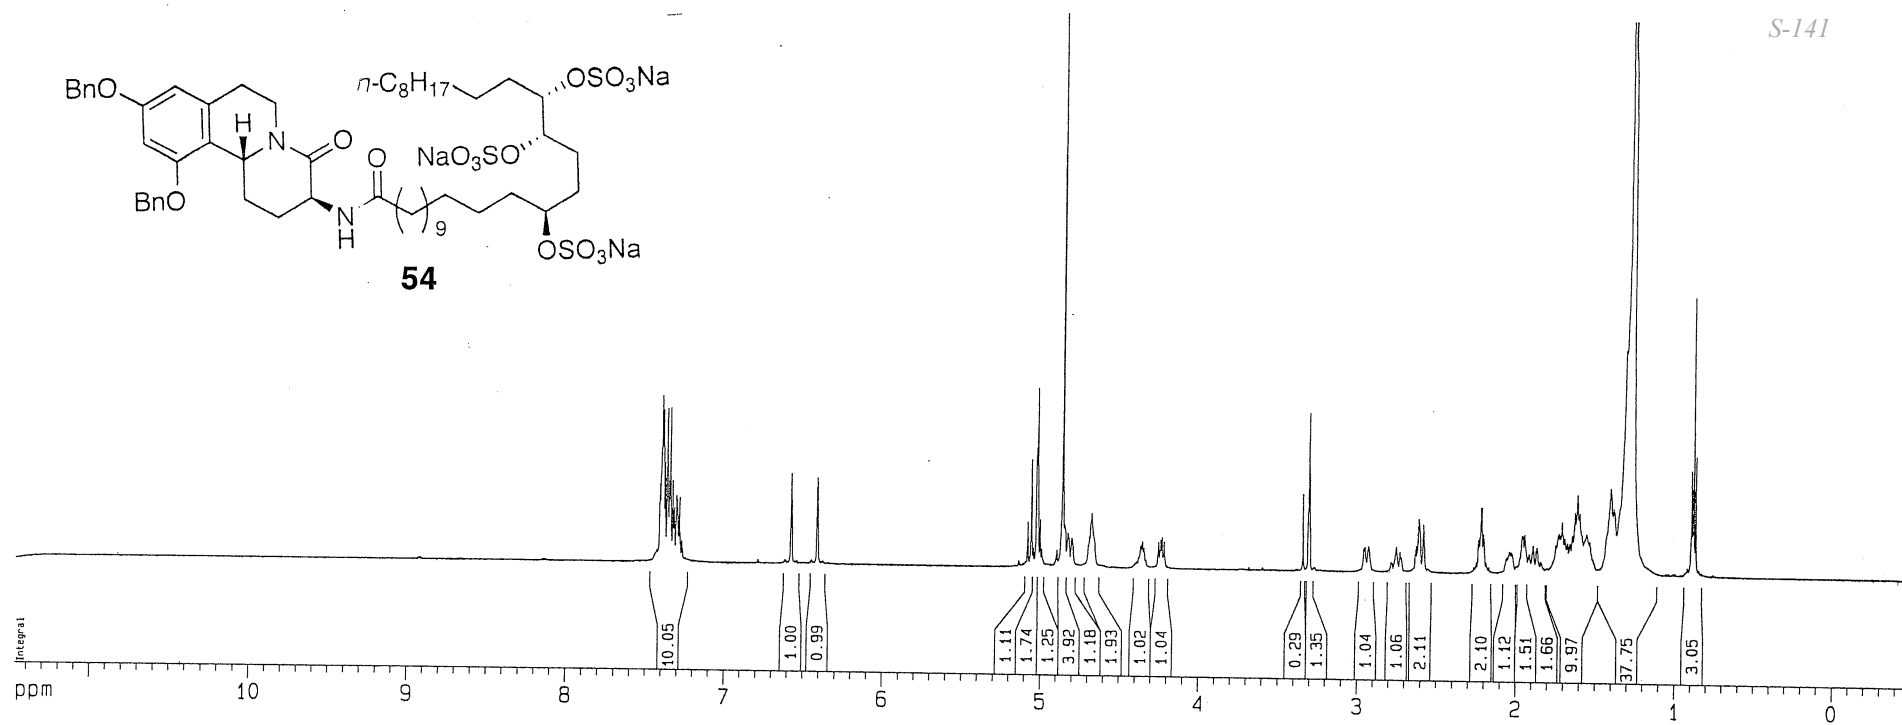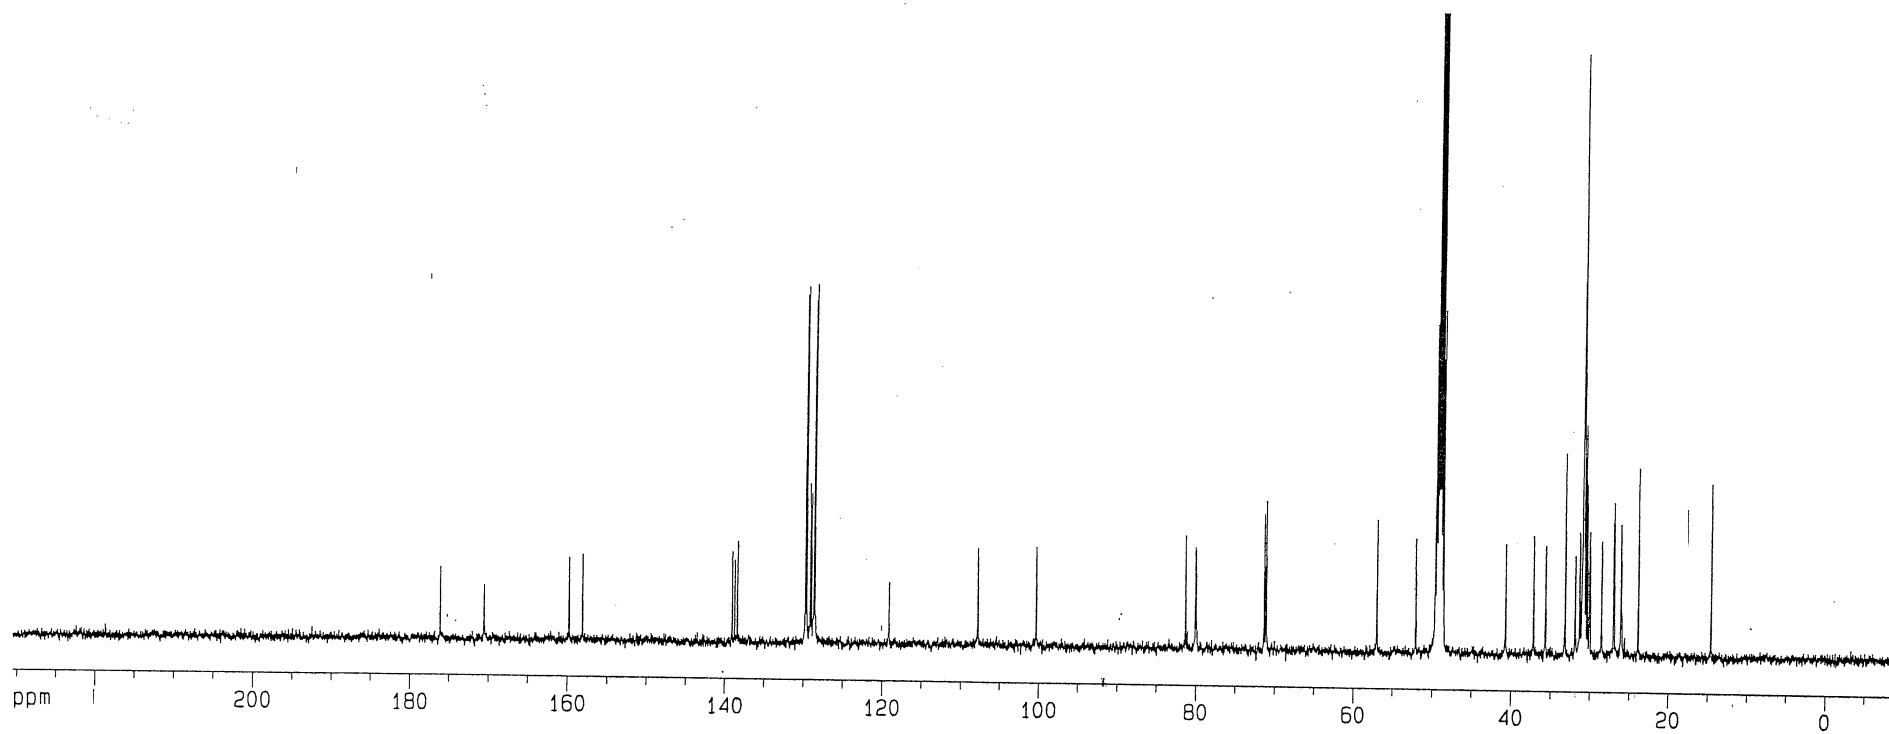

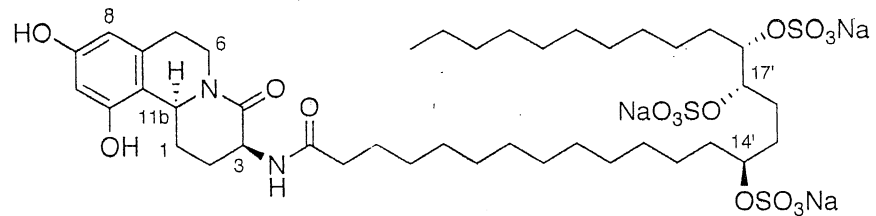(-)-Schulzeine B **2**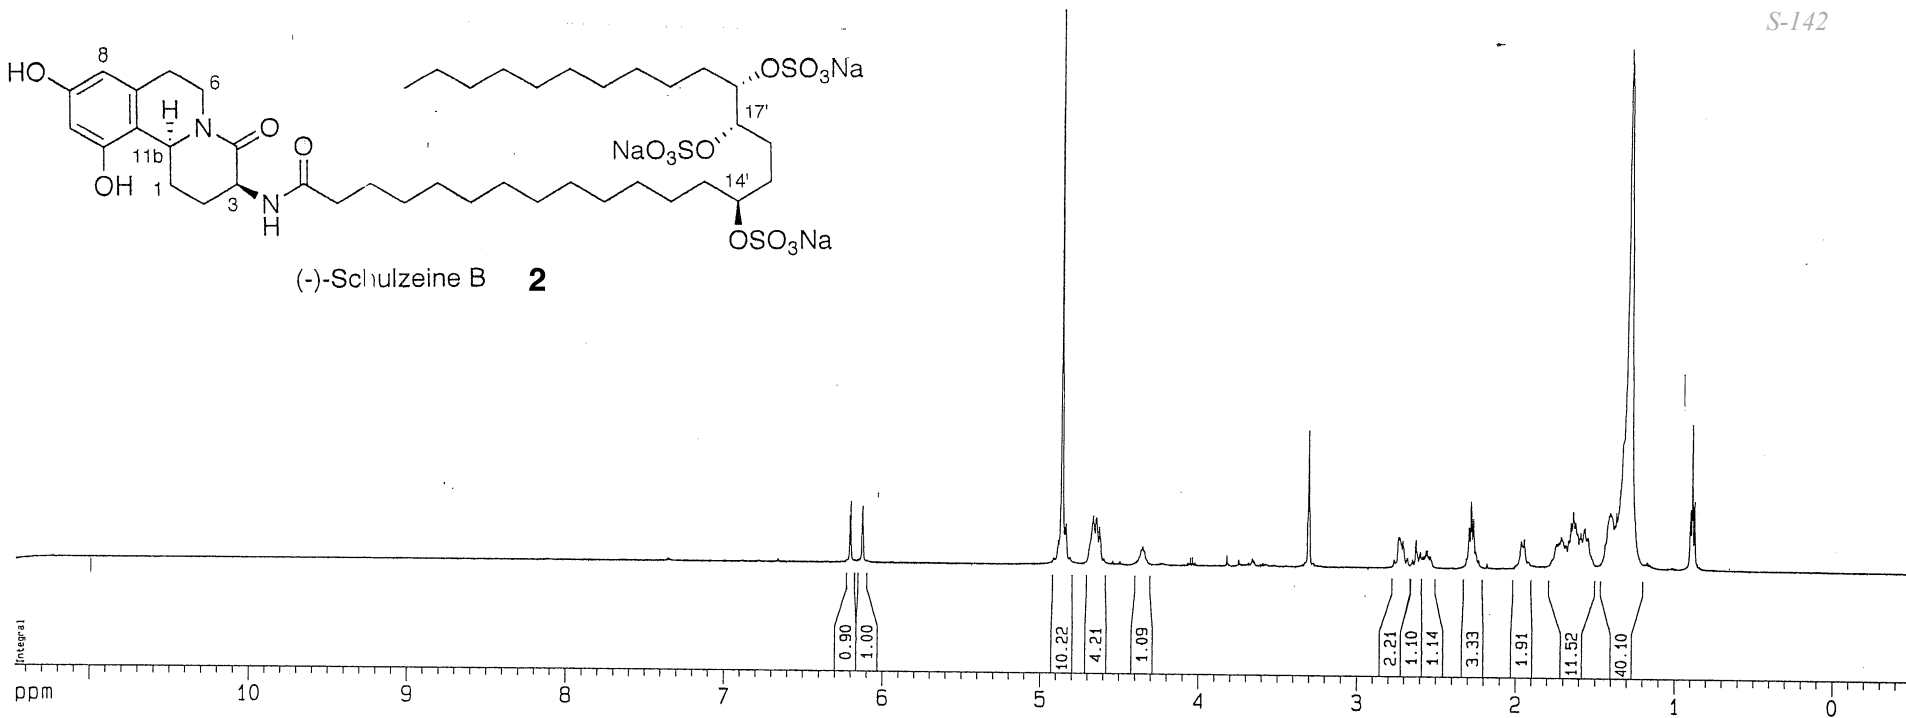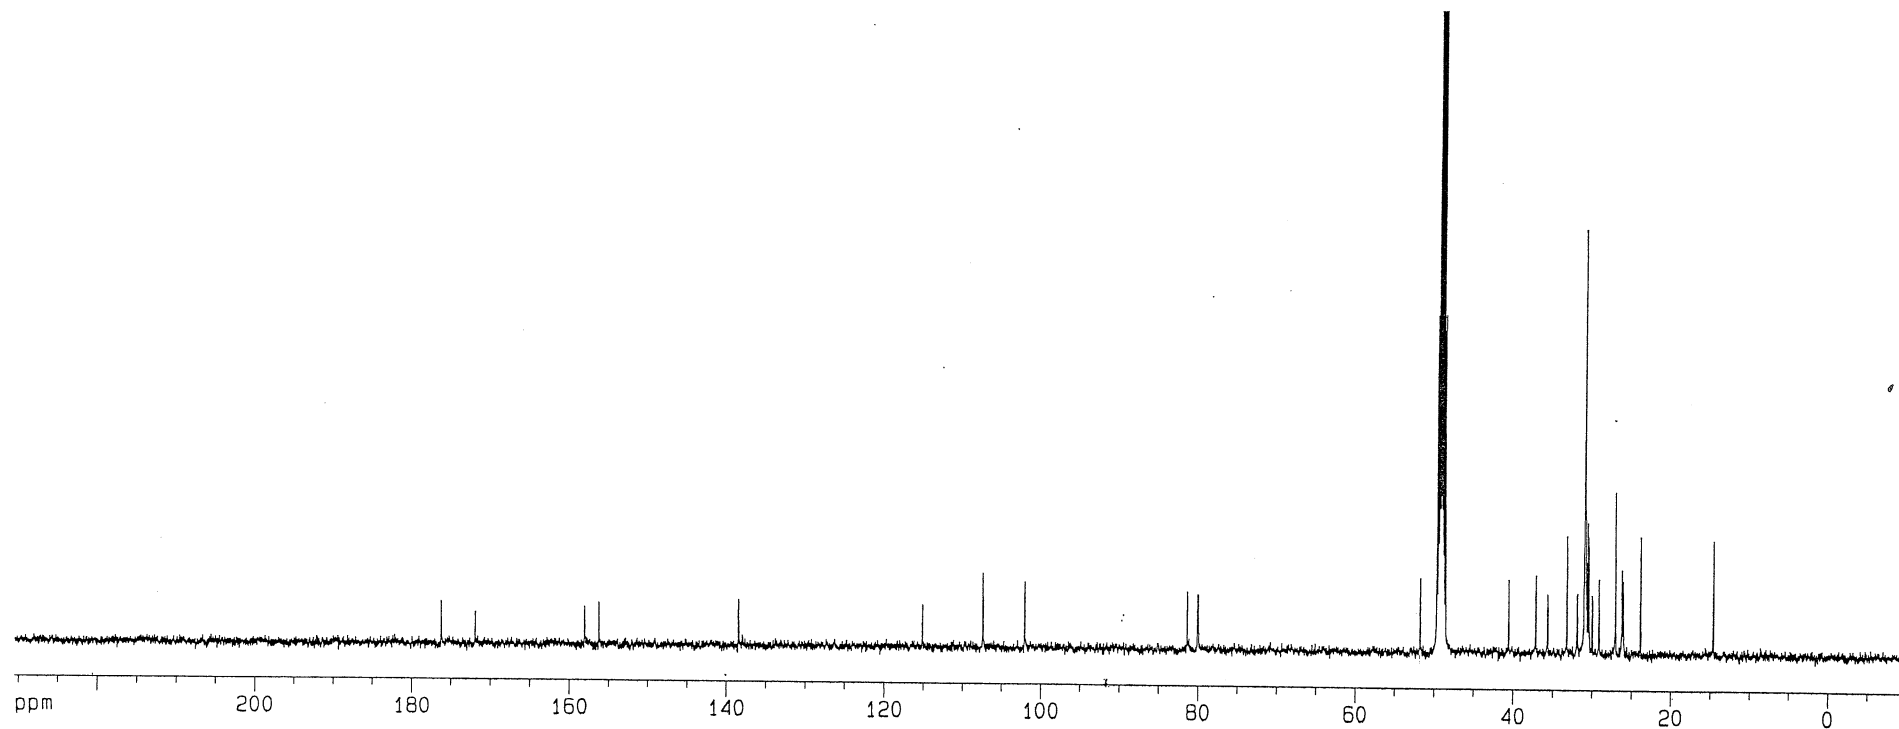

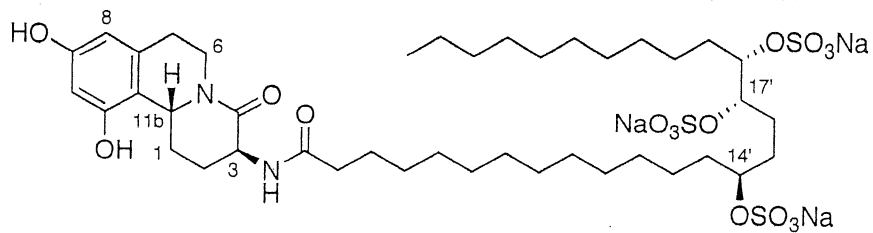

(-)-Schulzeine C

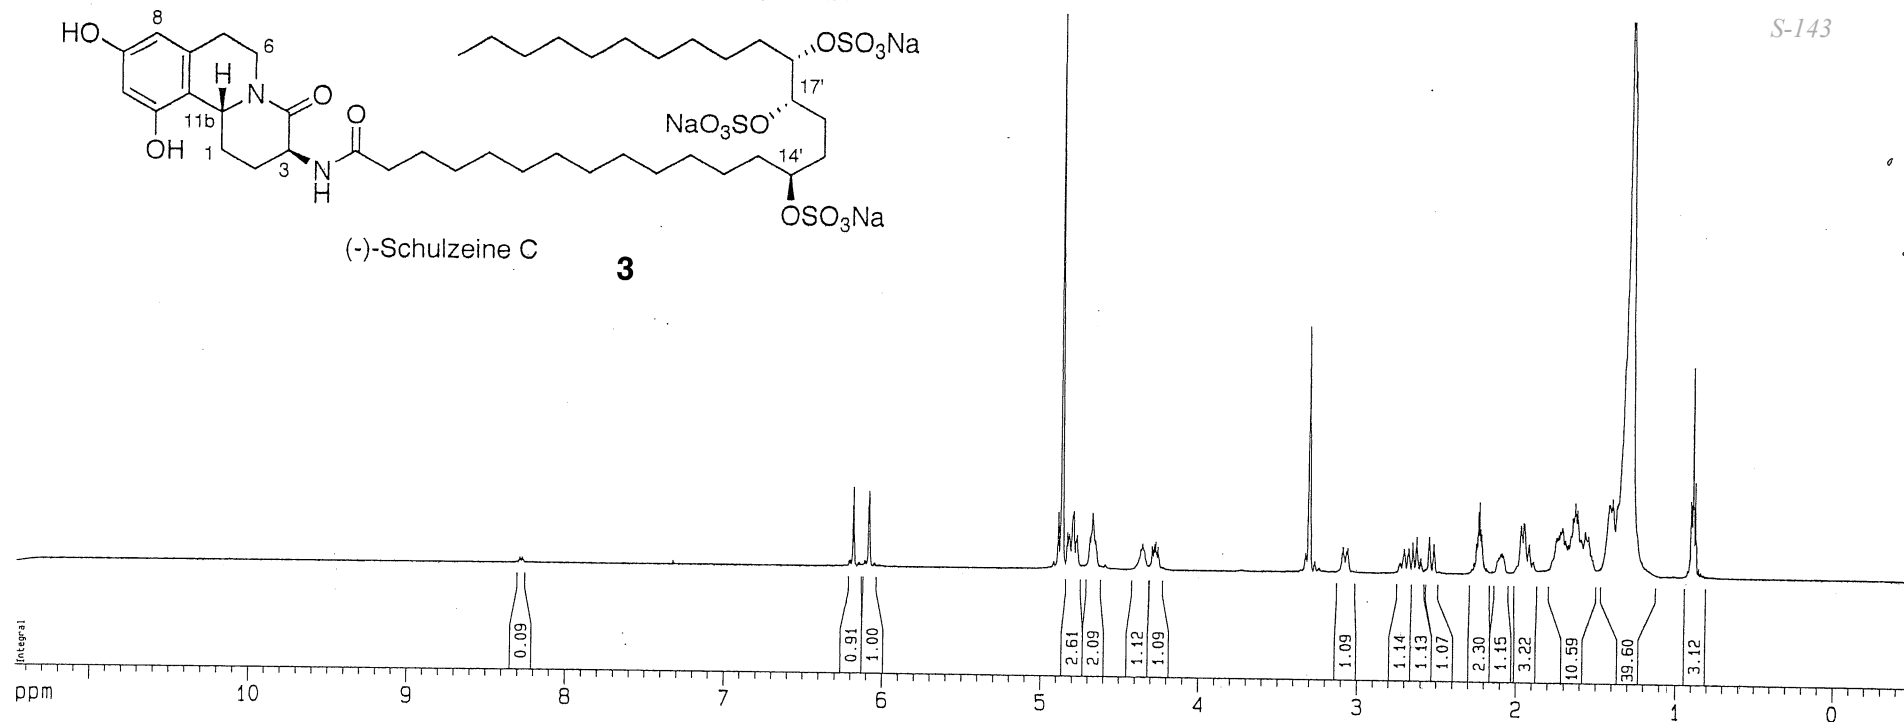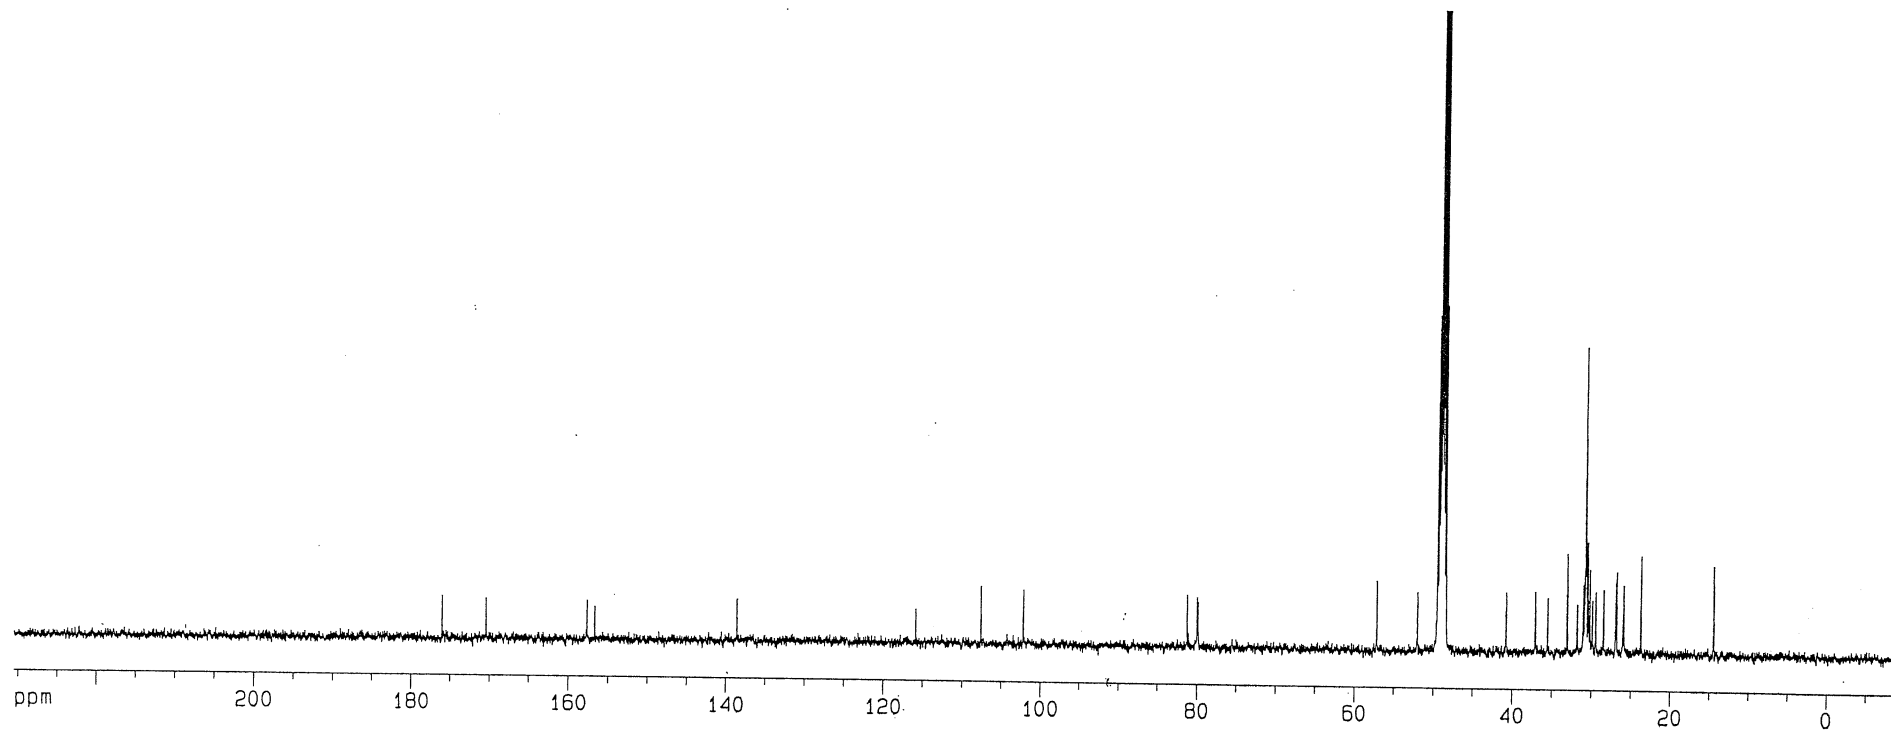

Supplement: NIHMS109228-supplement-2_si_002.pdf [file NIHMS109228-supplement-2_si_002.pdf]
